# Supplementary material for: Metal-free quinolylation of the primary amino groups of amino acid derivatives and peptides with dihydrooxazolo[3,2-a]quinoliniums
Source: Royal Society of Chemistry journal article supplement (doi:10.1039/c9gc01442j), 2019-01-01

## Supplementary Information

# Metal-free quinolylation of the primary amino groups of amino acid derivatives and peptides with dihydrooxazolo[3,2-a]quinoliniums

Peng Liu,<sup>a,b</sup> Bo Li,<sup>\*a,b</sup> Mengyu Xi,<sup>a,b</sup> Zhaoqiang Chen,<sup>a,b</sup> Haiguo Sun,<sup>a,b</sup> Xiajuan Huan,<sup>a</sup> Xuejun Xu,<sup>a</sup> Yong Zhang,<sup>a</sup> Kun Zou,<sup>a</sup> Xiangrui Jiang,<sup>a,b</sup> Zehong Miao,<sup>a,b</sup> Jinggen Liu,<sup>a,b</sup> Jingshan Shen,<sup>a,b</sup> Kaixian Chen,<sup>a,b,c</sup> Weiliang Zhu<sup>\*a,b,c</sup>

*<sup>a</sup>Key Laboratory of Receptor Research; Drug Discovery and Design Center, Shanghai Institute of Materia Medica, Chinese Academy of Sciences, 555 Zuchongzhi Road, Shanghai 201203, China*

*Email: boli@simm.ac.cn; wlzhu@simm.ac.cn*

*<sup>b</sup>School of Pharmacy, University of Chinese Academy of Sciences, No.19A Yuquan Road, Beijing 100049, China*

*<sup>c</sup>Open Studio for Druggability Research of Marine Natural Products, Pilot National Laboratory for Marine Science and Technology (Qingdao), 1 Wenhai Road, Aoshanwei, Jimo, Qingdao, 266237, China*

### Table of Contents

|                                  |    |
|----------------------------------|----|
| 1. Supporting figure .....       | 2  |
| 2. Chemical experiments .....    | 2  |
| 3. Biological studies .....      | 12 |
| 4. DFT Studies .....             | 14 |
| 5. References .....              | 16 |
| 6. NMR spectra of products ..... | 17 |

## 1. Supporting figure

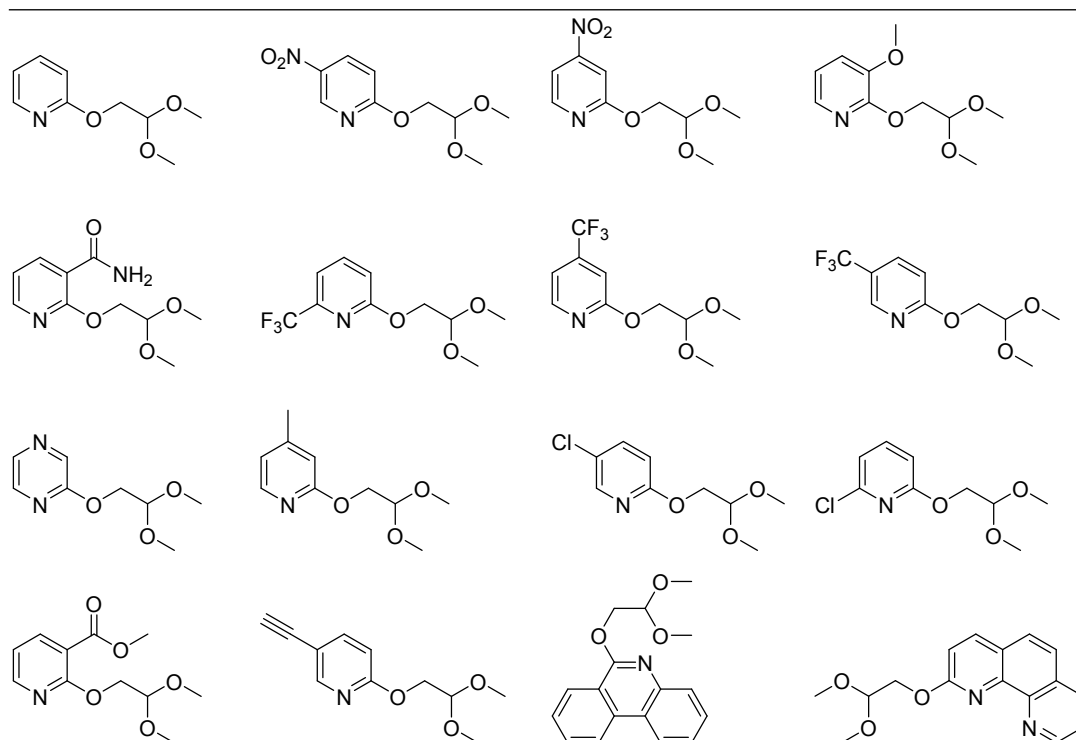

**Figure S1.** Screened substrates that can't react with N-terminus of amino acid

## 2. Chemical experiments

### 2.1 General information

All reactions were carried out at room temperature under anhydrous atmosphere. Yields were determined by HPLC. All materials and solvents were purchased from commercial suppliers and used without further purification. The LRMS and HRMS were recorded on Finnigan LCQ/DECA and Micromass Ultra Q-TOF (ESI) spectrometer, respectively.

The  $^1\text{H}$  and  $^{13}\text{C}$  spectra were taken on Bruker Avance - 400 and 500 NMR spectrometer operating at 400 MHz for  $^1\text{H}$  NMR and 125 MHz for  $^{13}\text{C}$  NMR, respectively, using TMS as the internal standard and  $\text{CDCl}_3$ ,  $\text{MeOD-}d_4$ ,  $\text{Acetone-}d_6$  or  $\text{DMSO-}d_6$  as the solvent. Chemical shifts are given in  $\delta$  values of ppm. The abbreviations s is singlet, d is doublet, t is triplet and m is multiplet. Coupling constants (J) were measured in hertz (Hz).

### 2.2 Substrate synthesis

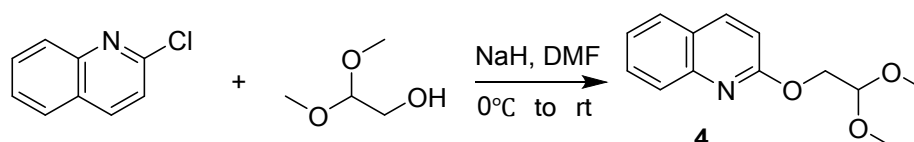

**2-(2,2-Dimethoxyethoxy)quinoline (4).** 2,2-dimethoxyethan-1-ol (3.89 g, 36.6 mmol) was charged into a 250 ml round-bottom flask containing anhydrous DMF (50 ml). Sodium hydride (1.76 g, 73.2 mmol) was added. After 30 minutes, 2-chloroquinoline (4 g, 24.4 mmol) was added and the reaction was stirred at room temperature for 24 h. The grey solution was quenched with

ice water (200 ml), extracted with EtOAc (200 ml × 2), washed with brine (200 ml × 2) and dried over Na<sub>2</sub>SO<sub>4</sub>, and purified by column chromatography to afford **4** as a white solid in 81% yield (4.608 g). <sup>1</sup>H NMR (400 MHz, CDCl<sub>3</sub>) δ 8.02 (d, *J* = 8.8 Hz, 1H), 7.85 (d, *J* = 8.5 Hz, 1H), 7.74 (d, *J* = 7.9 Hz, 1H), 7.64 (ddd, *J* = 8.3, 6.8, 1.5 Hz, 1H), 7.43 – 7.38 (m, 1H), 6.99 (d, *J* = 8.8 Hz, 1H), 4.86 (t, *J* = 5.3 Hz, 1H), 4.58 (d, *J* = 5.3 Hz, 2H), 3.51 (s, 6H). <sup>13</sup>C NMR (100 MHz, CDCl<sub>3</sub>) δ 161.41, 146.29, 138.81, 129.46, 127.37, 127.26, 125.18, 124.11, 113.07, 101.84, 64.58, 53.95. HRMS (ESI) [M+H]<sup>+</sup> found 234.1127, calcd for C<sub>13</sub>H<sub>16</sub>NO<sub>3</sub> 234.1125.

Alternative preparation method for compound **4**: quinolin-2-ol (10.0 mmol) was charged into a round-bottom flask containing anhydrous acetone (50 ml). Sodium carbonate (12.0 mmol) was added. After 30 minutes, 2-bromo-1,1-dimethoxyethane (11.0 mmol) was added and the reaction was stirred at reflux temperature for 48 h. The reaction mixture was quenched with ice water and filtered. After washing by water, the precipitate was dried to give the compound **4** in almost quantitative yield.

**2-(2,2-Dimethoxyethoxy)-4-methylquinoline (4A)**. Following the procedure of **4** starting from 2-chloro-4-methylquinoline, the product **4A** was obtained as a white solid in 39% yield. <sup>1</sup>H NMR (400 MHz, CDCl<sub>3</sub>) δ 7.89 (d, *J* = 8.2 Hz, 1H), 7.85 (d, *J* = 8.3 Hz, 1H), 7.63 (ddt, *J* = 8.2, 7.0, 1.3 Hz, 1H), 7.42 (ddt, *J* = 8.0, 7.0, 1.2 Hz, 1H), 6.85 (d, *J* = 1.3 Hz, 1H), 4.85 (td, *J* = 5.2, 1.0 Hz, 1H), 4.56 (dd, *J* = 5.3, 1.0 Hz, 2H), 3.50 (d, *J* = 1.0 Hz, 6H), 2.64 (d, *J* = 1.1 Hz, 3H). <sup>13</sup>C NMR (100 MHz, CDCl<sub>3</sub>) δ 161.26, 146.92, 146.28, 129.20, 127.74, 125.48, 123.86, 123.61, 112.98, 101.87, 64.30, 53.93, 18.65. HRMS (ESI) [M+H]<sup>+</sup> found 248.1277, calcd for C<sub>14</sub>H<sub>18</sub>NO<sub>3</sub> 248.1281.

**2-(2,2-Dimethoxyethoxy)-8-methylquinoline (4B)**. Following the procedure of **4** starting from 2-chloro-8-methylquinoline, the product **4B** was obtained as a white solid in 64% yield. <sup>1</sup>H NMR (400 MHz, CDCl<sub>3</sub>) δ 8.00 (d, *J* = 8.8 Hz, 1H), 7.59 (d, *J* = 8.1 Hz, 1H), 7.53 – 7.49 (m, 1H), 7.33 – 7.29 (m, 1H), 6.99 (d, *J* = 8.8 Hz, 1H), 4.92 (t, *J* = 5.4 Hz, 1H), 4.59 (d, *J* = 5.4 Hz, 2H), 3.52 (s, 6H), 2.71 (s, 3H). HRMS (ESI) [M+H]<sup>+</sup> found 248.1277, calcd for C<sub>14</sub>H<sub>18</sub>NO<sub>3</sub> 248.1281.

**6-Chloro-2-(2,2-dimethoxyethoxy)quinoline (4C)**. Following the procedure of **4** starting from 2,6-dichloroquinoline, the product **4C** was obtained as a white solid in 81% yield. <sup>1</sup>H NMR (400 MHz, CDCl<sub>3</sub>) δ 7.93 (d, *J* = 8.8 Hz, 1H), 7.78 (d, *J* = 8.9 Hz, 1H), 7.72 (d, *J* = 2.3 Hz, 1H), 7.57 (dd, *J* = 8.9, 2.4 Hz, 1H), 7.01 (d, *J* = 8.9 Hz, 1H), 4.85 (t, *J* = 5.3 Hz, 1H), 4.55 (d, *J* = 5.3 Hz, 2H), 3.50 (s, 6H). HRMS (ESI) [M+H]<sup>+</sup> found 268.0734, calcd for C<sub>13</sub>H<sub>15</sub>ClNO<sub>3</sub> 268.0735.

**8-Bromo-2-(2,2-dimethoxyethoxy)quinoline (4D)**. Following the procedure of **4** starting from 8-bromo-2-chloroquinoline and heating to 80 °C, the product **4D** was obtained as a white solid in 50% yield. <sup>1</sup>H NMR (400 MHz, CDCl<sub>3</sub>) δ 8.04 – 8.00 (m, 1H), 7.98 – 7.96 (m, 1H), 7.73 – 7.70 (m, 1H), 7.27 – 7.25 (m, 1H), 7.04 (d, *J* = 8.8 Hz, 1H), 4.99 (d, *J* = 5.4 Hz, 1H), 4.66 (d, *J* = 5.4 Hz, 2H), 3.53 (s, 6H). HRMS (ESI) [M+H]<sup>+</sup> found 312.016, calcd for C<sub>13</sub>H<sub>15</sub>BrNO<sub>3</sub> 312.018.

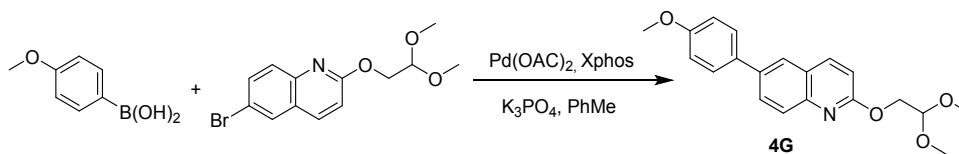

**2-(2,2-Dimethoxyethoxy)-6-(4-methoxyphenyl)quinoline (4G)**. (4-methoxyphenyl)boronic acid (73 mg, 0.64 mmol), 6-bromo-2-(2,2-dimethoxyethoxy)quinoline (100 mg, 0.32 mmol), Pd(OAc)<sub>2</sub> (1.5 mg, 0.64 mmol%), Xphos (12 mg, 2.56 mmol%) and K<sub>3</sub>PO<sub>4</sub> (136 mg, 0.64 mmol)

were charged into a 50 ml round-bottom flask containing toluene (20 ml). The reaction was nitrogen-flushed and then stirred at 100 °C overnight. Upon completion, the reaction mixture was cooled and evaporated to dryness. The residue was diluted in water and extracted twice with EtOAc, washed with brine and dried over Na<sub>2</sub>SO<sub>4</sub>, and purified by column chromatography to afford **4G** as white solid in 67% yield. <sup>1</sup>H NMR (400 MHz, CDCl<sub>3</sub>) δ 8.02 (d, *J* = 8.8 Hz, 1H), 7.89 – 7.83 (m, 3H), 7.62 (d, *J* = 8.8 Hz, 2H), 7.02 (d, *J* = 8.8 Hz, 2H), 6.98 (d, *J* = 8.8 Hz, 1H), 4.85 (t, *J* = 5.3 Hz, 1H), 4.57 (d, *J* = 5.3 Hz, 2H), 3.87 (s, 3H), 3.50 (s, 6H). HRMS (ESI) [M+H]<sup>+</sup> found 340.147, calcd for C<sub>20</sub>H<sub>22</sub>NO<sub>4</sub> 340.150.

**2-(2,2-Dimethoxyethoxy)-6-(4-(trifluoromethyl)phenyl)quinoline (4H)**. Following the procedure of **4G**, the product **4H** was obtained as a white solid in 90% yield. <sup>1</sup>H NMR (400 MHz, CDCl<sub>3</sub>) δ 8.11 – 8.01 (m, 1H), 7.97 – 7.83 (m, 3H), 7.83 – 7.68 (m, 4H), 7.07 – 6.97 (m, 1H), 4.90 – 4.80 (m, 1H), 4.63 – 4.52 (m, 2H), 3.52 (s, 3H), 3.49 (s, 3H). HRMS (ESI) [M+H]<sup>+</sup> found 378.1315, calcd for C<sub>20</sub>H<sub>19</sub>F<sub>3</sub>NO<sub>3</sub> 378.1312.

**4-(2-(2,2-Dimethoxyethoxy)quinolin-6-yl)benzonitrile (4I)**. Following the procedure of **4G**, the product **4I** was obtained as a white solid in 85% yield. <sup>1</sup>H NMR (400 MHz, CDCl<sub>3</sub>) δ 8.05 (d, *J* = 8.9 Hz, 1H), 7.93 (s, 1H), 7.92 (d, *J* = 4.8 Hz, 1H), 7.87 – 7.83 (m, 1H), 7.80 – 7.73 (m, 4H), 7.02 (d, *J* = 8.8 Hz, 1H), 4.85 (t, *J* = 5.3 Hz, 1H), 4.57 (d, *J* = 5.3 Hz, 2H), 3.50 (s, 6H). HRMS (ESI) [M+H]<sup>+</sup> found 335.1324, calcd for C<sub>20</sub>H<sub>19</sub>N<sub>2</sub>O<sub>3</sub> 335.1326.

**Methyl 4-(2-(2,2-dimethoxyethoxy)quinolin-6-yl)benzoate (4J)**. Following the procedure of **4G**, the product **4J** was obtained as a white solid in 88% yield. <sup>1</sup>H NMR (400 MHz, CDCl<sub>3</sub>) δ 8.14 (d, *J* = 8.4 Hz, 2H), 8.05 (d, *J* = 8.9 Hz, 1H), 7.95 (s, 1H), 7.92 – 7.89 (m, 2H), 7.75 (d, *J* = 8.4 Hz, 2H), 7.01 (d, *J* = 8.8 Hz, 1H), 4.85 (t, *J* = 5.3 Hz, 1H), 4.57 (d, *J* = 5.3 Hz, 2H), 3.95 (s, 3H), 3.50 (s, 6H). HRMS (ESI) [M+H]<sup>+</sup> found 368.1423, calcd for C<sub>21</sub>H<sub>22</sub>NO<sub>5</sub> 368.1424.

**2-(2,2-Dimethoxyethoxy)-7-(2-fluorophenyl)-4-methylquinoline (4K)**. Following the procedure of **4G**, the product **4K** was obtained as a white solid in 87% yield. <sup>1</sup>H NMR (400 MHz, CDCl<sub>3</sub>) δ 8.05 (s, 1H), 7.94 (d, *J* = 8.5 Hz, 1H), 7.65 (d, *J* = 8.5 Hz, 1H), 7.60 (t, *J* = 7.7 Hz, 1H), 7.42 – 7.35 (m, 1H), 7.29 (d, *J* = 7.3 Hz, 1H), 7.25 – 7.19 (m, 1H), 6.87 (s, 1H), 4.87 (t, *J* = 5.2 Hz, 1H), 4.58 (d, *J* = 5.2 Hz, 2H), 3.51 (s, 6H), 2.66 (s, 3H). <sup>13</sup>C NMR (125 MHz, CDCl<sub>3</sub>) δ 157.3, 156.5, 142.4, 142.0, 132.5, 126.6, 124.9, 124.3, 123.5, 120.6, 120.4, 120.1, 119.3, 111.7, 108.9, 97.5, 60.1, 49.6, 14.2. HRMS (ESI) [M+H]<sup>+</sup> found 342.1499, calcd for C<sub>20</sub>H<sub>21</sub>FNO<sub>3</sub> 342.15.

## 2.3 Experimental data

**N-methyl-2-(quinolin-2-ylamino)acetamide (6)**. 2-(2,2-dimethoxyethoxy)quinoline (200 mg, 0.86 mmol) reacted with hydrochloric acid in diethyl ether (5 mL). After that the solvent was evaporated under anhydrous atmosphere. The residue was dissolved in anhydrous n-butanol (10 mL) directly without further purification and treated with 2-amino-N-methylacetamide (151 mg, 1.71 mmol) and Et<sub>3</sub>N (237 μL, 1.71 mmol). After stirring overnight at room temperature, the reaction mixture was concentrated. H<sub>2</sub>O was added to the reaction mixture and the mixture was extracted twice with EtOAc. The combined organic layer was washed with brine, dried over Na<sub>2</sub>SO<sub>4</sub>, and concentrated in vacuo. The residue was purified by reverse-phase silica gel column chromatography (MeOH/H<sub>2</sub>O = 0% to 80%) to give **6** as a white solid in 95% yield (172 mg). <sup>1</sup>H NMR (400 MHz, CDCl<sub>3</sub>) δ 7.86 (d, *J* = 8.9 Hz, 1H), 7.72 (d, *J* = 8.4 Hz, 1H), 7.63 (d, *J* = 8.0 Hz, 1H), 7.57 (t, *J* = 7.5 Hz, 1H), 7.31 – 7.25 (m, 1H), 6.96 (s, 1H), 6.71 (d, *J* = 8.9 Hz, 1H), 5.67 (s, 1H), 4.24 (s, 2H), 2.84 (d, *J* = 4.9 Hz, 3H), 2.24 (s, 1H). <sup>13</sup>C NMR (125 MHz, CDCl<sub>3</sub>) δ 171.3,

156.0, 147.4, 137.8, 129.8, 127.5, 126.2, 123.7, 122.8, 111.9, 45.9, 26.2. HRMS (ESI) [M+H]<sup>+</sup> found m/z 216.1006, calcd for C<sub>12</sub>H<sub>14</sub>N<sub>3</sub>O 215.1058.

Alternative quaternary ammonium salt preparation method: Concentrated sulfuric acid is added dropwise to the sodium chloride solid to produce hydrogen chloride gas. This gas is then passed to the acetone solution containing the 2-(2,2-dimethoxyethoxy)quinoline for reaction. After the reaction is completed, the solvent is distilled for recovery. The obtained residue is a quaternary ammonium salt for further amino coupling reaction.

**(R)-N-methyl-2-(quinolin-2-ylamino)propanamide (6a).** Following the procedure of **6** starting from (S)-2-amino-N-methylpropanamide, the product **6a** was obtained as a white solid (yield 92% for 2 steps). <sup>1</sup>H NMR (400 MHz, CDCl<sub>3</sub>) δ 7.80 (d, *J* = 8.8 Hz, 1H), 7.67 (d, *J* = 8.3 Hz, 1H), 7.59 (d, *J* = 7.9 Hz, 1H), 7.53 (t, *J* = 7.3 Hz, 1H), 7.27 – 7.21 (m, 1H), 7.10 (s, 1H), 6.61 (d, *J* = 8.8 Hz, 1H), 5.28 (d, *J* = 5.9 Hz, 1H), 4.72 (p, *J* = 6.7 Hz, 1H), 2.78 (d, *J* = 4.9 Hz, 3H), 1.52 (d, *J* = 7.0 Hz, 3H). <sup>13</sup>C NMR (125 MHz, CDCl<sub>3</sub>) δ 174.3, 155.8, 147.4, 137.6, 129.7, 127.5, 126.1, 123.6, 122.6, 112.0, 50.7, 26.1, 18.1. HRMS (ESI) [M+H]<sup>+</sup> found m/z 230.1284, calcd for C<sub>13</sub>H<sub>16</sub>N<sub>3</sub>O 230.1288. [α]<sub>D</sub><sup>20</sup> -141.5 (c = 0.188, CH<sub>3</sub>OH).

**(S)-N,3,3-trimethyl-2-(quinolin-2-ylamino)butanamide (6b).** Following the procedure of **6** starting from 2-amino-N,3,3-trimethylbutanamide, the product **6b** was obtained as a white solid (yield 66% for 2 steps). <sup>1</sup>H NMR (400 MHz, CDCl<sub>3</sub>) δ 7.82 (d, *J* = 8.9 Hz, 1H), 7.69 (d, *J* = 8.4 Hz, 1H), 7.61 (s, 1H), 7.57 – 7.52 (m, 1H), 7.25 (t, *J* = 8.0 Hz, 1H), 6.70 (d, *J* = 8.9 Hz, 1H), 6.44 (s, 1H), 5.68 (s, 1H), 4.50 (d, *J* = 7.8 Hz, 1H), 2.80 (d, *J* = 4.9 Hz, 3H), 1.14 (s, 9H). <sup>13</sup>C NMR (125 MHz, CDCl<sub>3</sub>) δ 172.6, 156.3, 147.1, 137.8, 129.7, 127.5, 125.7, 123.6, 122.5, 112.0, 34.4, 27.0, 26.1. HRMS (ESI) [M+H]<sup>+</sup> found m/z 272.1756, calcd for C<sub>16</sub>H<sub>22</sub>N<sub>3</sub>O 272.1757. [α]<sub>D</sub><sup>20</sup> -178.7 (c = 0.075, CH<sub>3</sub>OH).

**(S)-N-methyl-2-phenyl-2-(quinolin-2-ylamino)acetamide (6c).** Following the procedure of **6** starting from (S)-2-amino-N-methyl-2-phenylacetamide, the product **6c** was obtained as a white solid (yield 63% for 2 steps). <sup>1</sup>H NMR (400 MHz, MeOD-*d*<sub>4</sub>) δ 7.88 (d, *J* = 8.9 Hz, 1H), 7.66 – 7.60 (m, 2H), 7.57 – 7.47 (m, 3H), 7.42 – 7.36 (m, 2H), 7.36 – 7.30 (m, 1H), 5.69 (s, 1H), 2.77 (s, 3H). <sup>13</sup>C NMR (125 MHz, MeOD-*d*<sub>4</sub>) δ 173.8, 156.1, 147.5, 138.6, 136.8, 128.9, 128.3, 127.7, 127.5, 127.1, 125.6, 123.7, 122.0, 112.4, 59.7, 25.1. HRMS (ESI) [M+H]<sup>+</sup> found m/z 292.145, calcd for C<sub>18</sub>H<sub>18</sub>N<sub>3</sub>O 292.144. [α]<sub>D</sub><sup>20</sup> -4.0 (c = 0.121, CH<sub>3</sub>OH).

**(S)-N-methyl-3-phenyl-2-(quinolin-2-ylamino)propanamide (6d).** Following the procedure of **6** starting from (S)-2-amino-N-methyl-3-phenylpropanamide, the product **6d** was obtained as a white solid (yield 72% for 2 steps). <sup>1</sup>H NMR (400 MHz, Acetone-*d*<sub>6</sub>) δ 7.86 (s, 1H), 7.63 (d, *J* = 8.3 Hz, 2H), 7.50 (t, *J* = 7.5 Hz, 1H), 7.41 (s, 1H), 7.33 (d, *J* = 7.5 Hz, 2H), 7.25 (t, *J* = 7.5 Hz, 2H), 7.17 (s, 2H), 6.88 (d, *J* = 8.9 Hz, 1H), 6.50 (s, 1H), 5.11 – 5.02 (m, 1H), 3.30 (dd, *J* = 13.8, 5.9 Hz, 1H), 3.13 (dd, *J* = 13.7, 7.8 Hz, 1H), 2.70 (d, *J* = 4.7 Hz, 3H). <sup>13</sup>C NMR (125 MHz, Acetone-*d*<sub>6</sub>) δ 205.2, 172.3, 156.2, 147.8, 138.5, 136.7, 129.3, 129.0, 128.1, 127.4, 126.2, 126.1, 123.6, 121.8, 113.1, 56.0, 38.0, 25.2. HRMS (ESI) [M+H]<sup>+</sup> found m/z 306.1597, calcd for C<sub>19</sub>H<sub>20</sub>N<sub>3</sub>O 306.1601. [α]<sub>D</sub><sup>20</sup> 29.9 (c = 0.126, CH<sub>3</sub>OH).

**Methyl quinolin-2-ylphenylalaninate (6e).** Following the procedure of **6** starting from methyl L-phenylalaninate, the product **6e** was obtained as a white solid (yield 61% for 2 steps). <sup>1</sup>H NMR (400 MHz, CDCl<sub>3</sub>) δ 7.82 (dd, *J* = 8.8, 2.4 Hz, 1H), 7.75 (d, *J* = 8.1 Hz, 1H), 7.62 (d, *J* = 7.7 Hz, 1H), 7.60 – 7.54 (m, 1H), 7.35 – 7.26 (m, 4H), 7.21 (d, *J* = 7.3 Hz, 2H), 6.65 (dd, *J* = 8.8, 2.7 Hz, 1H), 5.27 – 5.21 (m, 1H), 5.19 (s, 1H), 3.77 (d, *J* = 2.8 Hz, 3H), 3.39 (ddd, *J* = 13.7, 5.5, 2.4 Hz, 1H), 3.27 (ddd, *J* = 13.9, 5.7, 2.5 Hz, 1H). <sup>13</sup>C NMR (125 MHz, CDCl<sub>3</sub>) δ 173.3, 155.1, 147.1, 137.6, 136.6, 130.4, 129.6, 129.4, 128.5, 127.4, 126.9, 126.2, 123.6, 122.6, 112.1, 55.1, 20

52.2. HRMS (ESI) [M+H]<sup>+</sup> found *m/z* 307.1437, calcd for C<sub>19</sub>H<sub>19</sub>N<sub>2</sub>O<sub>2</sub> 307.1441. [α]<sub>D</sub> -2.9 (c = 0.105, CH<sub>3</sub>OH).

**(R)-2-(quinolin-2-ylamino)butanamide (6f).** Following the procedure of **6** starting from 2-aminobutanamide, the product **6f** was obtained as a white solid (yield 85% for 2 steps). <sup>1</sup>H NMR (400 MHz, DMSO-*d*<sub>6</sub>) δ 7.85 (d, *J* = 8.9 Hz, 1H), 7.62 (d, *J* = 7.9 Hz, 1H), 7.48 – 7.43 (m, 3H), 7.15 (ddd, *J* = 8.1, 4.8, 3.2 Hz, 1H), 7.06 (d, *J* = 7.8 Hz, 1H), 6.99 (s, 1H), 6.93 (d, *J* = 8.9 Hz, 1H), 4.54 (q, *J* = 6.9 Hz, 1H), 1.90 – 1.76 (m, 1H), 1.76 – 1.63 (m, 1H), 0.94 (t, *J* = 7.4 Hz, 3H). <sup>13</sup>C NMR (125 MHz, DMSO-*d*<sub>6</sub>) δ 175.1, 157.0, 148.0, 136.6, 129.4, 127.9, 126.0, 123.5, 121.7, 113.9, 55.4, 25.8, 10.8. HRMS (ESI) [M+H]<sup>+</sup> found *m/z* 230.1288, calcd for C<sub>13</sub>H<sub>16</sub>N<sub>3</sub>O 230.1288. [α]<sub>D</sub> 20

-66.3 (c = 0.080, CH<sub>3</sub>OH).

**Methyl quinolin-2-ylglycinate (6g).** Following the procedure of **6** starting from methyl glycinate, the product **6g** was obtained as a white solid (yield 95% for 2 steps). <sup>1</sup>H NMR (400 MHz, CDCl<sub>3</sub>) δ 7.83 (d, *J* = 8.9 Hz, 1H), 7.71 (d, *J* = 8.4 Hz, 1H), 7.60 (d, *J* = 7.9 Hz, 1H), 7.57 – 7.51 (m, 1H), 7.23 (t, 1H), 6.72 (d, 1H), 5.24 (s, 1H), 4.38 (d, *J* = 5.1 Hz, 2H), 3.80 (s, 3H). <sup>13</sup>C NMR (125 MHz, CDCl<sub>3</sub>) δ 171.8, 155.7, 147.6, 137.4, 129.5, 127.4, 126.4, 123.7, 122.5, 112.1, 52.3, 43.3, 29.7. HRMS (ESI) [M+H]<sup>+</sup> found *m/z* 217.0973, calcd for C<sub>12</sub>H<sub>13</sub>N<sub>2</sub>O<sub>2</sub> 217.0972.

**Methyl quinolin-2-yl-L-alaninate (6h).** Following the procedure of **6** starting from methyl D-alaninate, the product **6h** was obtained as a white solid (yield 93% for 2 steps). <sup>1</sup>H NMR (400 MHz, CDCl<sub>3</sub>) δ 7.81 (d, *J* = 8.8 Hz, 1H), 7.68 (d, *J* = 8.3 Hz, 1H), 7.59 (d, *J* = 8.8 Hz, 1H), 7.53 (t, *J* = 7.7 Hz, 1H), 7.25 – 7.21 (m, 1H), 6.67 (d, *J* = 8.8 Hz, 1H), 5.27 (s, 1H), 4.90 (p, *J* = 7.1 Hz, 1H), 3.77 (s, 3H), 1.56 (d, *J* = 7.1 Hz, 3H). <sup>13</sup>C NMR (125 MHz, CDCl<sub>3</sub>) δ 175.0, 155.3, 147.4, 137.4, 129.5, 127.4, 126.4, 123.6, 122.5, 112.0, 52.3, 49.7, 18.6. HRMS (ESI) [M+H]<sup>+</sup> found *m/z* 20

231.1129, calcd for C<sub>13</sub>H<sub>15</sub>N<sub>2</sub>O<sub>2</sub> 231.1128. [α]<sub>D</sub> -23.7 (c = 0.114, CH<sub>3</sub>OH).

**Methyl quinolin-2-yl-L-valinate (6i).** Following the procedure of **6** starting from methyl D-valinate, the product **6i** was obtained as a white solid (yield 91% for 2 steps). <sup>1</sup>H NMR (400 MHz, CDCl<sub>3</sub>) δ 7.76 (d, *J* = 8.8 Hz, 1H), 7.67 (d, *J* = 8.4 Hz, 1H), 7.56 (d, *J* = 8.8 Hz, 1H), 7.54 – 7.49 (m, 1H), 7.24 – 7.19 (m, 1H), 6.67 (d, *J* = 8.8 Hz, 1H), 5.21 (d, *J* = 7.5 Hz, 1H), 4.87 (dd, *J* = 8.3, 5.4 Hz, 1H), 3.75 (s, 3H), 1.05 (dd, *J* = 6.8, 3.4 Hz, 6H). <sup>13</sup>C NMR (125 MHz, CDCl<sub>3</sub>) δ 174.1, 156.1, 147.7, 137.2, 129.4, 127.3, 126.5, 123.7, 122.3, 112.1, 59.0, 51.9, 31.3, 19.1, 18.5. [α]<sub>D</sub> 20

-145.6 (c = 0.148, CH<sub>3</sub>OH).

**Methyl quinolin-2-yl-L-isoleucinate (6j).** Following the procedure of **6** starting from methyl D-isoleucinate, the product **6j** was obtained as a white solid (yield 82% for 2 steps). <sup>1</sup>H NMR (400 MHz, CDCl<sub>3</sub>) δ 7.84 (dd, *J* = 8.9, 2.2 Hz, 1H), 7.71 (d, *J* = 8.4 Hz, 1H), 7.59 (d, *J* = 7.9 Hz, 1H),

7.54 (t,  $J = 7.7$  Hz, 1H), 7.23 (t,  $J = 7.3$  Hz, 1H), 6.71 (dd,  $J = 8.9, 2.0$  Hz, 1H), 5.02 (s, 1H), 4.83 (s, 1H), 3.77 (s, 3H), 2.14 – 2.01 (m, 1H), 1.70 – 1.53 (m, 1H), 1.03 (d,  $J = 3.0$  Hz, 3H), 1.02 – 0.99 (m, 3H). HRMS (ESI)  $[M+H]^+$  found  $m/z$  273.1603, calcd for  $C_{16}H_{21}N_2O_2$  273.1598.  $[\alpha]_{D}^{20}$  -8.1 (c = 0.078,  $CH_3OH$ ).

**Methyl quinolin-2-yl-L-serinate (6k).** Following the procedure of **6** starting from methyl D-serinate, the product **6k** was obtained as a white solid (yield 88% for 2 steps).  $^1H$  NMR (400 MHz,  $CDCl_3$ )  $\delta$  7.86 (d,  $J = 8.9$  Hz, 1H), 7.68 (d,  $J = 8.4$  Hz, 1H), 7.62 (d,  $J = 7.9$  Hz, 1H), 7.59 – 7.53 (m, 1H), 7.28 – 7.25 (m, 1H), 6.77 (d,  $J = 8.9$  Hz, 1H), 5.87 (s, 1H), 4.97 (s, 1H), 4.26 (dd,  $J = 10.9, 2.6$  Hz, 1H), 3.98 (dd,  $J = 10.9, 6.2$  Hz, 1H), 3.85 (s, 3H).  $^{13}C$  NMR (125 MHz,  $CDCl_3$ )  $\delta$  171.8, 155.6, 146.2, 138.2, 130.0, 127.5, 125.6, 123.5, 123.0, 112.5, 65.5, 58.0, 52.9. HRMS (ESI)  $[M+H]^+$  found  $m/z$  247.1081, calcd for  $C_{13}H_{15}N_2O_3$  247.1077.  $[\alpha]_{D}^{20}$  5.8 (c = 0.136,  $CH_3OH$ ).

**Methyl quinolin-2-yl-L-threoninate (6l).** Following the procedure of **6** starting from methyl L-threoninate, the product **6l** was obtained as a white solid (yield 66% for 2 steps).  $^1H$  NMR (400 MHz,  $CDCl_3$ )  $\delta$  7.86 (d,  $J = 8.8$  Hz, 1H), 7.68 (d,  $J = 8.3$  Hz, 1H), 7.62 (dd,  $J = 8.0, 1.2$  Hz, 1H), 7.55 (ddd,  $J = 8.4, 7.0, 1.5$  Hz, 1H), 7.28 – 7.24 (m, 1H), 6.77 (d,  $J = 8.8$  Hz, 1H), 5.51 (s, 1H), 4.96 (dd,  $J = 7.3, 3.8$  Hz, 1H), 4.40 (qd,  $J = 6.4, 3.7$  Hz, 1H), 3.82 (s, 3H), 1.35 (d,  $J = 6.4$  Hz, 3H).  $^{13}C$  NMR (125 MHz,  $CDCl_3$ )  $\delta$  172.8, 156.0, 147.1, 137.6, 129.6, 127.4, 126.3, 123.8, 122.7, 112.4, 69.3, 59.9, 52.5, 20.4. HRMS (ESI)  $[M+H]^+$  found  $m/z$  261.1228, calcd for  $C_{14}H_{17}N_2O_3$  261.1234.  $[\alpha]_{D}^{20}$  -113.8 (c = 0.052,  $CH_3OH$ ).

**Methyl quinolin-2-yl-L-tyrosinate (6m).** Following the procedure of **6** starting from methyl L-tyrosinate, the product **6m** was obtained as a white solid (yield 63% for 2 steps).  $^1H$  NMR (400 MHz,  $CDCl_3$ )  $\delta$  7.85 (d,  $J = 8.9$  Hz, 1H), 7.73 (d,  $J = 8.5$  Hz, 1H), 7.61 (dd,  $J = 8.0, 1.2$  Hz, 1H), 7.54 (ddd,  $J = 8.4, 7.0, 1.5$  Hz, 1H), 7.26 (ddd,  $J = 8.0, 7.0, 1.1$  Hz, 1H), 6.97 (d,  $J = 8.5$  Hz, 2H), 6.68 (d,  $J = 8.5$  Hz, 2H), 6.64 (d,  $J = 8.9$  Hz, 1H), 5.47 (s, 1H), 5.03 (s, 1H), 3.75 (s, 3H), 3.25 (dd,  $J = 13.9, 5.3$  Hz, 1H), 3.13 (dd,  $J = 13.9, 6.4$  Hz, 1H).  $^{13}C$  NMR (125 MHz,  $CDCl_3$ )  $\delta$  173.6, 155.5, 155.5, 147.0, 138.1, 130.4, 129.9, 127.5, 127.3, 125.8, 123.6, 122.7, 115.6, 111.5, 55.5, 52.3, 37.2. HRMS (ESI)  $[M+H]^+$  found  $m/z$  323.1388, calcd for  $C_{19}H_{19}N_2O_3$  323.1390.  $[\alpha]_{D}^{20}$  12.4 (c = 0.106,  $CH_3OH$ ).

**Methyl quinolin-2-yl-L-tryptophanate (6n).** Following the procedure of **6** starting from methyl L-tryptophanate, the product **6n** was obtained as a white solid (yield 70% for 2 steps).  $^1H$  NMR (400 MHz,  $CDCl_3$ )  $\delta$  8.27 (s, 1H), 7.80 (d,  $J = 8.9$  Hz, 1H), 7.76 (d,  $J = 8.4$  Hz, 1H), 7.61 (d,  $J = 7.9$  Hz, 2H), 7.59 – 7.54 (m, 1H), 7.35 (d,  $J = 8.1$  Hz, 1H), 7.28 – 7.24 (m, 1H), 7.20 (t,  $J = 7.1$  Hz, 1H), 7.13 (t,  $J = 7.5$  Hz, 1H), 7.01 (d,  $J = 2.1$  Hz, 1H), 6.57 (d,  $J = 8.8$  Hz, 1H), 5.34 – 5.29 (m, 1H), 5.27 (d,  $J = 8.2$  Hz, 1H), 3.73 (s, 3H), 3.54 (dd,  $J = 14.6, 5.2$  Hz, 1H), 3.45 (dd,  $J = 14.6, 5.6$  Hz, 1H).  $^{13}C$  NMR (125 MHz,  $CDCl_3$ )  $\delta$  173.9, 155.4, 147.5, 137.4, 136.2, 129.5, 127.8, 127.4, 126.4, 123.6, 122.9, 122.5, 122.1, 119.6, 118.8, 112.2, 111.2, 110.7, 54.6, 52.2, 27.9. HRMS (ESI)  $[M+H]^+$  found  $m/z$  346.1560, calcd for  $C_{21}H_{20}N_3O_2$  346.1550.  $[\alpha]_{D}^{20}$  2.5 (c = 0.120,  $CH_3OH$ ).

**Methyl quinolin-2-yl-D-methioninate (6p).** Following the procedure of **6** starting from methyl L-methioninate, the product **6p** was obtained as a white solid (yield 96% for 2 steps).  $^1H$

NMR (400 MHz, CDCl<sub>3</sub>)  $\delta$  7.82 (d,  $J$  = 8.8 Hz, 1H), 7.68 (d,  $J$  = 8.4 Hz, 1H), 7.59 (d,  $J$  = 7.9 Hz, 1H), 7.53 (t,  $J$  = 7.7 Hz, 1H), 7.24 (t,  $J$  = 7.4 Hz, 1H), 6.70 (d,  $J$  = 8.8 Hz, 1H), 5.42 (s, 1H), 5.06 (q,  $J$  = 7.2 Hz, 1H), 3.78 (s, 3H), 2.65 (td,  $J$  = 7.9, 3.4 Hz, 2H), 2.35 (dq,  $J$  = 13.5, 7.4 Hz, 1H), 2.16 (dd,  $J$  = 14.3, 7.5 Hz, 1H). <sup>13</sup>C NMR (125 MHz, CDCl<sub>3</sub>)  $\delta$  173.9, 155.4, 147.3, 137.5, 129.6, 127.4, 126.4, 123.7, 122.6, 112.0, 53.2, 52.4, 32.0, 30.3, 15.5. HRMS (ESI) [M+H]<sup>+</sup> found  $m/z$  291.1167, calcd for C<sub>15</sub>H<sub>19</sub>N<sub>2</sub>O<sub>2</sub>S 291.1162. [ $\alpha$ ] -4.2 (c = 0.095, CH<sub>3</sub>OH).

**Methyl N<sup>6</sup>-(quinolin-2-yl)lysinate (6r).** Following the procedure of **6** starting from methyl lysinate, the product **6r** was obtained as a white solid (yield 53% for 2 steps). <sup>1</sup>H NMR (400 MHz, D<sub>2</sub>O)  $\delta$  7.94 (s, 1H), 7.63 (t, 1H), 7.59 (d,  $J$  = 7.5 Hz, 1H), 7.53 (s, 1H), 7.35 (t,  $J$  = 7.6 Hz, 1H), 6.76 (s, 1H), 4.06 (t,  $J$  = 6.4 Hz, 1H), 3.70 (s, 3H), 3.33 (t,  $J$  = 6.7 Hz, 2H), 2.00 – 1.80 (m, 2H), 1.67 (p,  $J$  = 7.2 Hz, 2H), 1.55 – 1.34 (m, 2H). <sup>13</sup>C NMR (125 MHz, D<sub>2</sub>O)  $\delta$  170.6, 152.5, 141.9, 135.6, 132.5, 128.7, 125.4, 121.1, 117.0, 113.8, 53.6, 52.7, 41.6, 29.4, 26.9, 21.7. HRMS (ESI) [M+H]<sup>+</sup> found  $m/z$  288.17, calcd for C<sub>16</sub>H<sub>22</sub>N<sub>3</sub>O<sub>2</sub> 288.1707.

**2-Amino-N-methyl-6-(quinolin-2-ylamino)hexanamide (6s).** Following the procedure of **6** starting from 2-(2,2-dimethoxyethoxy)-4-methylquinoline, the product **6A** was obtained as a white solid (yield 50% for 2 steps). <sup>1</sup>H NMR (500 MHz, CDCl<sub>3</sub>)  $\delta$  7.80 (d,  $J$  = 8.9 Hz, 1H), 7.65 (d,  $J$  = 8.4 Hz, 1H), 7.57 (d,  $J$  = 7.9 Hz, 1H), 7.54 – 7.46 (m, 1H), 7.19 (t,  $J$  = 7.7 Hz, 1H), 6.63 (d,  $J$  = 8.9 Hz, 1H), 3.56 – 3.49 (m, 2H), 3.40 – 3.33 (m, 1H), 2.80 (d,  $J$  = 4.9 Hz, 3H), 1.73 – 1.67 (m, 2H), 1.61 – 1.57 (m, 2H), 1.54 – 1.48 (m, 2H). <sup>13</sup>C NMR (125 MHz, CDCl<sub>3</sub>)  $\delta$  175.5, 156.9, 147.8, 137.3, 129.5, 127.4, 125.8, 123.2, 121.9, 111.2, 77.2, 76.9, 76.7, 55.0, 41.3, 34.7, 29.3, 25.7, 23.1. HRMS (ESI) [M+H]<sup>+</sup> found  $m/z$  287.1864, calcd for C<sub>16</sub>H<sub>23</sub>N<sub>4</sub>O 287.1866.

**N-methyl-2-((4-methylquinolin-2-yl)amino)acetamide (6A).** Following the procedure of **6** starting from 2-(2,2-dimethoxyethoxy)-4-methylquinoline, the product **6A** was obtained as a white solid (yield 91% for 2 steps). <sup>1</sup>H NMR (400 MHz, CDCl<sub>3</sub>)  $\delta$  7.81 (s, 1H), 7.73 (s, 1H), 7.58 (s, 1H), 7.30 (s, 1H), 7.05 (s, 1H), 6.55 (s, 1H), 5.63 (s, 1H), 4.21 (s, 2H), 2.83 (d,  $J$  = 4.5 Hz, 3H), 2.56 (s, 3H). <sup>13</sup>C NMR (125 MHz, DMSO-*d*<sub>6</sub>)  $\delta$  170.9, 156.7, 147.8, 144.1, 129.3, 126.4, 124.2, 123.8, 121.9, 113.5, 44.3, 26.0, 18.7. HRMS (ESI) [M+H]<sup>+</sup> found  $m/z$  230.1291, calcd for C<sub>13</sub>H<sub>16</sub>N<sub>3</sub>O 230.1288.

**N-methyl-2-((8-methylquinolin-2-yl)amino)acetamide (6B).** Following the procedure of **6** starting from 2-(2,2-dimethoxyethoxy)-8-methylquinoline, the product **6B** was obtained as a white solid (yield 45% for 2 steps). <sup>1</sup>H NMR (400 MHz, CDCl<sub>3</sub>)  $\delta$  7.85 (d,  $J$  = 8.8 Hz, 1H), 7.50 (dd,  $J$  = 8.0, 1.4 Hz, 1H), 7.46 (d,  $J$  = 7.1 Hz, 1H), 7.24 (s, 2H), 7.19 (dd,  $J$  = 7.9, 7.1 Hz, 1H), 6.72 (d,  $J$  = 8.8 Hz, 1H), 5.50 (s, 1H), 4.22 (d,  $J$  = 5.2 Hz, 2H), 2.83 (d,  $J$  = 4.9 Hz, 3H), 2.65 (s, 3H). <sup>13</sup>C NMR (125 MHz, CDCl<sub>3</sub>)  $\delta$  171.9, 155.2, 146.1, 138.0, 134.0, 130.1, 125.5, 123.4, 122.5, 111.6, 46.5, 26.0, 17.9. HRMS (ESI) [M+H]<sup>+</sup> found  $m/z$  230.1282, calcd for C<sub>13</sub>H<sub>16</sub>N<sub>3</sub>O 230.1288.

**2-((6-Chloroquinolin-2-yl)amino)-N-methylacetamide (6C).** Following the procedure of **6** starting from 6-chloro-2-(2,2-dimethoxyethoxy)quinoline, the product **6C** was obtained as a white solid (yield 53% for 2 steps). <sup>1</sup>H NMR (400 MHz, MeOD-*d*<sub>4</sub>)  $\delta$  7.86 (d,  $J$  = 9.0 Hz, 1H), 7.65 (s, 1H), 7.59 (d,  $J$  = 9.0 Hz, 1H), 7.46 (d,  $J$  = 8.9 Hz, 1H), 6.88 (d,  $J$  = 8.8 Hz, 1H), 4.13 (s, 2H), 2.76 (s, 3H). <sup>13</sup>C NMR (125 MHz, DMSO-*d*<sub>6</sub>)  $\delta$  170.6, 157.3, 146.6, 135.9, 129.6, 128.0, 126.6, 125.6, 124.4, 114.9, 44.3, 26.0. HRMS (ESI) [M+H]<sup>+</sup> found  $m/z$  250.0739, calcd for C<sub>12</sub>H<sub>13</sub>ClN<sub>3</sub>O 250.0742.



**2-((8-Bromoquinolin-2-yl)amino)-N-methylacetamide (6D).** Following the procedure of **6** starting from 8-bromo-2-(2,2-dimethoxyethoxy)quinoline, the product **6D** was obtained as a white solid (yield 42% for 2 steps). <sup>1</sup>H NMR (400 MHz, CDCl<sub>3</sub>) δ 7.90 (dd, *J* = 7.6, 1.2 Hz, 1H), 7.81 (d, *J* = 8.9 Hz, 1H), 7.59 (dd, *J* = 7.9, 1.1 Hz, 1H), 7.13 (t, *J* = 7.8 Hz, 1H), 6.76 (d, *J* = 8.9 Hz, 1H), 6.10 (s, 1H), 4.23 (d, *J* = 6.0 Hz, 2H), 2.85 (d, *J* = 4.9 Hz, 3H). <sup>13</sup>C NMR (125 MHz, CDCl<sub>3</sub>) δ 171.5, 156.7, 144.4, 137.9, 133.1, 127.3, 124.8, 123.0, 121.2, 113.2, 46.8, 26.0. HRMS (ESI) [M+H]<sup>+</sup> found *m/z* 294.0245, calcd for C<sub>12</sub>H<sub>13</sub>BrN<sub>3</sub>O 294.0237.

**2-((3-Chloroisoquinolin-1-yl)amino)-N-methylacetamide (6E).** Following the procedure of **6** starting from 3-chloro-1-(2,2-dimethoxyethoxy)isoquinoline, the product **6E** was obtained as a white solid (yield 52% for 2 steps). <sup>1</sup>H NMR (400 MHz, CDCl<sub>3</sub>) δ 7.86 (d, *J* = 8.4 Hz, 1H), 7.65 – 7.58 (m, 2H), 7.50 – 7.42 (m, 1H), 7.01 (s, 1H), 6.49 (s, 1H), 6.39 (s, 1H), 4.29 (d, *J* = 5.0 Hz, 2H), 2.91 (d, *J* = 4.8 Hz, 3H). <sup>13</sup>C NMR (125 MHz, CDCl<sub>3</sub>) δ 170.5, 154.7, 143.8, 138.7, 130.8, 126.4, 126.2, 122.0, 116.6, 109.4, 45.4, 26.3. HRMS (ESI) [M+H]<sup>+</sup> found *m/z* 250.0739, calcd for C<sub>12</sub>H<sub>13</sub>ClN<sub>3</sub>O 250.0742.

**N-methyl-2-((6-phenylquinolin-2-yl)amino)acetamide (6F).** Following the procedure of **6** starting from 2-(2,2-dimethoxyethoxy)-6-phenylquinoline, the product **6F** was obtained as a white solid (yield 75% for 2 steps). <sup>1</sup>H NMR (400 MHz, CDCl<sub>3</sub>) δ 7.90 (d, *J* = 8.8 Hz, 1H), 7.82 (t, 2H), 7.76 (d, *J* = 9.1 Hz, 1H), 7.67 (d, *J* = 8.0 Hz, 2H), 7.47 (t, *J* = 7.6 Hz, 2H), 7.36 (t, *J* = 7.4 Hz, 1H), 6.83 (s, 1H), 6.72 (d, *J* = 8.8 Hz, 1H), 5.50 (s, 1H), 4.23 (d, *J* = 5.1 Hz, 2H), 2.84 (d, *J* = 4.9 Hz, 2H). <sup>13</sup>C NMR (125 MHz, CDCl<sub>3</sub>) δ 171.2, 156.0, 146.7, 140.7, 138.0, 135.7, 129.3, 128.9, 127.1, 127.1, 126.5, 125.4, 123.9, 112.3, 45.9, 26.2. HRMS (ESI) [M+H]<sup>+</sup> found *m/z* 292.1449, calcd for C<sub>18</sub>H<sub>18</sub>N<sub>3</sub>O 292.1444.

**2-((6-(4-Methoxyphenyl)quinolin-2-yl)amino)-N-methylacetamide (6G).** Following the procedure of **6** starting from 2-(2,2-dimethoxyethoxy)-6-(4-methoxyphenyl)quinoline, the product **6G** was obtained as a white solid (yield 54% for 2 steps). <sup>1</sup>H NMR (400 MHz, DMSO-*d*<sub>6</sub>) δ 7.91 (d, *J* = 9.0 Hz, 1H), 7.87 (d, *J* = 1.9 Hz, 1H), 7.75 (dd, *J* = 8.7, 2.0 Hz, 1H), 7.65 (d, *J* = 8.7 Hz, 2H), 7.51 (d, 1H), 7.28 (t, *J* = 5.5 Hz, 1H), 7.01 (d, *J* = 8.7 Hz, 2H), 6.89 (d, *J* = 8.9 Hz, 1H), 4.00 (d, *J* = 5.5 Hz, 2H), 3.78 (s, 3H), 2.60 (d, *J* = 4.0 Hz, 3H). <sup>13</sup>C NMR (125 MHz, DMSO-*d*<sub>6</sub>) δ 170.8, 159.0, 157.0, 147.1, 136.9, 133.3, 132.8, 128.1, 128.0, 126.6, 124.7, 123.8, 114.8, 114.1, 55.6, 44.5, 26.0. HRMS (ESI) [M+H]<sup>+</sup> found *m/z* 322.1549, calcd for C<sub>19</sub>H<sub>20</sub>N<sub>3</sub>O<sub>2</sub> 322.155.

**N-methyl-2-((6-(4-(trifluoromethyl)phenyl)quinolin-2-yl)amino)acetamide (6H).** Following the procedure of **6** starting from 2-(2,2-dimethoxyethoxy)-6-(4-(trifluoromethyl)phenyl)quinoline, the product **6H** was obtained as a white solid (yield 65% for 2 steps). <sup>1</sup>H NMR (400 MHz, DMSO-*d*<sub>6</sub>) δ 8.06 (d, *J* = 1.8 Hz, 1H), 7.96 (t, 3H), 7.86 (dd, *J* = 8.7, 2.0 Hz, 1H), 7.80 (d, *J* = 8.3 Hz, 2H), 7.57 (d, 1H), 7.41 (t, *J* = 5.8 Hz, 1H), 6.93 (d, *J* = 8.9 Hz, 1H), 4.02 (d, *J* = 5.4 Hz, 2H), 2.60 (d, *J* = 3.9 Hz, 3H). <sup>13</sup>C NMR (125 MHz, DMSO-*d*<sub>6</sub>) δ 170.6, 157.5, 148.1, 144.4, 137.1, 131.7, 128.3, 127.5, 126.8, 126.3, 126.2, 126.2, 123.8, 114.5, 44.4, 26.0. HRMS (ESI) [M+H]<sup>+</sup> found *m/z* 360.1317, calcd for C<sub>19</sub>H<sub>17</sub>FN<sub>3</sub>O 360.1318.

**2-((6-(4-Cyanophenyl)quinolin-2-yl)amino)-N-methylacetamide (6I).** Following the procedure of **6** starting from 4-(2-(2,2-dimethoxyethoxy)quinolin-6-yl)benzotrile, the product **6I** was obtained as a white solid (yield 78% for 2 steps). <sup>1</sup>H NMR (400 MHz, DMSO-*d*<sub>6</sub>) δ 8.11 (s, 1H), 7.94 (dt, *J* = 19.1, 9.6 Hz, 7H), 7.59 (d, *J* = 8.8 Hz, 1H), 7.49 (t, *J* = 5.6 Hz, 1H), 6.96 (d, *J* = 9.1 Hz, 1H), 4.04 (d, *J* = 5.2 Hz, 2H), 2.62 (d, *J* = 4.4 Hz, 3H). <sup>13</sup>C NMR (125 MHz, DMSO-*d*<sub>6</sub>) δ

170.6, 157.6, 148.3, 144.9, 137.1, 133.3, 131.3, 128.2, 127.6, 126.9, 126.5, 123.7, 119.5, 114.5, 109.7, 44.4, 26.0. HRMS (ESI) [M+H]<sup>+</sup> found m/z 317.1401, calcd for C<sub>19</sub>H<sub>17</sub>N<sub>4</sub>O 317.1397.

**Methyl 4-(2-((2-(methylamino)-2-oxoethyl)amino)quinolin-6-yl)benzoate (6J).** Following the procedure of **6** starting from methyl 4-(2-(2,2-dimethoxyethoxy)quinolin-6-yl)benzoate, the product **6J** was obtained as a white solid (yield 57% for 2 steps). <sup>1</sup>H NMR (400 MHz, DMSO-*d*<sub>6</sub>) δ 8.09 (d, *J* = 2.0 Hz, 1H), 8.05 (d, *J* = 8.4 Hz, 2H), 7.98 (d, *J* = 8.9 Hz, 1H), 7.94 – 7.88 (m, 4H), 7.59 (d, *J* = 8.7 Hz, 1H), 7.44 (t, *J* = 5.5 Hz, 1H), 6.95 (d, *J* = 8.9 Hz, 1H), 4.04 (d, *J* = 5.6 Hz, 2H), 3.88 (s, 3H), 2.62 (d, *J* = 4.6 Hz, 3H). <sup>13</sup>C NMR (125 MHz, DMSO-*d*<sub>6</sub>) δ 170.7, 166.6, 157.5, 148.1, 145.0, 137.1, 131.9, 130.3, 128.3, 128.2, 127.0, 126.8, 126.3, 123.8, 114.4, 56.5, 52.6, 26.0. HRMS (ESI) [M+H]<sup>+</sup> found m/z 350.1501, calcd for C<sub>20</sub>H<sub>20</sub>N<sub>3</sub>O<sub>3</sub> 350.1499.

**2-((7-(2-Fluorophenyl)-4-methylquinolin-2-yl)amino)-N-methylacetamide (6K).** Following the procedure of **6** starting from 2-(2,2-dimethoxyethoxy)-7-(2-fluorophenyl)-4-methylquinoline, the product **6K** was obtained as a white solid (yield 70% for 2 steps). <sup>1</sup>H NMR (400 MHz, MeOD-*d*<sub>4</sub>) δ 7.83 (d, *J* = 8.5 Hz, 1H), 7.80 (s, 1H), 7.54 (t, *J* = 7.8 Hz, 1H), 7.41 (d, *J* = 8.5 Hz, 1H), 7.39 – 7.35 (m, 1H), 7.27 (d, *J* = 7.5 Hz, 1H), 7.25 – 7.20 (m, 1H), 6.70 (s, 1H), 4.14 (s, 2H), 2.76 (s, 3H), 2.56 (s, 3H). <sup>13</sup>C NMR (126 MHz, MeOD) δ 172.4, 160.3, 158.4, 156.5, 146.9, 144.3, 136.1, 130.1, 128.6, 125.4, 123.8, 123.0, 122.7, 122.3, 115.3, 112.2, 43.7, 24.5, 16.8. HRMS (ESI) [M+H]<sup>+</sup> found m/z 324.1507, calcd for C<sub>19</sub>H<sub>19</sub>FN<sub>3</sub>O 324.1507.

**N-(2-(2,5-dimethoxyphenyl)-2-hydroxyethyl)-2-(quinolin-2-ylamino)acetamide (8a).** Following the procedure of **6** starting from midodrine hydrochloride, the product **8a** was obtained as a white solid (yield 72% for 2 steps). <sup>1</sup>H NMR (400 MHz, MeOD-*d*<sub>4</sub>) δ 7.88 (d, *J* = 8.9 Hz, 1H), 7.62 (t, *J* = 8.0 Hz, 2H), 7.53 – 7.48 (m, 1H), 7.24 (t, 1H), 7.00 (d, 1H), 6.81 (d, 1H), 6.75 (d, 1H), 6.70 (dd, *J* = 8.9, 3.1 Hz, 1H), 5.08 (dd, *J* = 7.1, 4.3 Hz, 1H), 4.12 (s, 2H), 3.72 (s, 3H), 3.68 (s, 3H), 3.56 (dd, 1H), 3.39 (dd, 1H). <sup>13</sup>C NMR (125 MHz, MeOD-*d*<sub>4</sub>) δ 172.5, 156.8, 153.8, 150.3, 147.3, 137.2, 131.1, 129.1, 127.2, 125.4, 123.7, 122.0, 112.5, 112.3, 111.1, 66.7, 54.9, 54.6, 45.1, 44.6. HRMS (ESI) [M+H]<sup>+</sup> found m/z 382.1761, calcd for C<sub>21</sub>H<sub>24</sub>N<sub>3</sub>O<sub>4</sub> 382.1761.

**(1S,3S,5S)-2-((1S,3S,5R,7S)-3-hydroxyadamantan-1-yl)-2-(quinolin-2-ylamino)acetyl)-2-azabicyclo[3.1.0]hexane-3-carbonitrile (8b).** Following the procedure of **6** starting from saxagliptin, the product **8b** was obtained as a white solid (yield 46% for 2 steps). <sup>1</sup>H NMR (400 MHz, CDCl<sub>3</sub>) δ 7.58 – 7.46 (m, 5H), 7.22 (t, *J* = 7.3 Hz, 1H), 6.65 (d, *J* = 8.7 Hz, 1H), 5.94 (d, *J* = 9.5 Hz, 1H), 5.27 (d, *J* = 9.4 Hz, 1H), 5.00 (dd, *J* = 10.6, 2.4 Hz, 1H), 4.63 (td, *J* = 6.2, 2.6 Hz, 1H), 2.75 (s, 1H), 2.51 (ddd, *J* = 13.8, 10.7, 5.8 Hz, 1H), 2.36 (dd, *J* = 13.7, 2.4 Hz, 1H), 2.32 – 2.23 (m, 3H), 2.07 (d, *J* = 11.6 Hz, 1H), 2.00 – 1.92 (m, 2H), 1.86 (dd, *J* = 25.7, 12.0 Hz, 2H), 1.73 (q, *J* = 14.1 Hz, 6H), 1.59 (d, *J* = 14.3 Hz, 3H), 1.28 (s, 2H), 1.18 (s, 1H), 1.17 – 1.11 (m, 1H). <sup>13</sup>C NMR (125 MHz, CDCl<sub>3</sub>) δ 171.7, 156.6, 147.5, 136.9, 129.2, 127.5, 126.1, 123.8, 122.2, 119.5, 113.2, 68.7, 58.9, 46.2, 45.3, 44.6, 44.2, 40.7, 38.3, 38.0, 37.7, 35.5, 30.6, 30.4, 30.3, 17.5, 13.7. HRMS (ESI) [M+H]<sup>+</sup> found m/z 443.2432, calcd for C<sub>27</sub>H<sub>31</sub>N<sub>4</sub>O<sub>2</sub> 443.2442. [α]<sub>D</sub><sup>20</sup> -

111.0 (c = 0.091, CH<sub>3</sub>OH).

**Methyl quinolin-2-yl-L-tyrosyl-L-seryl-L-leucinate (8c).** Following the procedure of **6** starting from methyl tyrosyleutide, the product **8c** was obtained as a white solid (yield 56% for 2 steps). <sup>1</sup>H NMR (400 MHz, DMSO-*d*<sub>6</sub>) δ 9.16 (s, 1H), 8.20 (d, *J* = 7.9 Hz, 1H), 7.98 (d, *J* = 7.9 Hz, 1H), 7.84 (d, *J* = 8.9 Hz, 1H), 7.60 (d, *J* = 7.9 Hz, 1H), 7.50 – 7.42 (m, 2H), 7.21 (d, *J* = 7.6 Hz, 1H), 7.17 (s, 1H), 7.13 (d, *J* = 7.6 Hz, 2H), 6.85 (d, *J* = 8.9 Hz, 1H), 6.62 (d, *J* = 7.6 Hz, 2H), 4.84

(t,  $J = 5.0$  Hz, 1H), 4.76 (s, 1H), 4.31 (dd,  $J = 14.0, 7.0$  Hz, 2H), 4.15 (d,  $J = 5.0$  Hz, 1H), 3.61 (s, 3H), 3.19 – 3.17 (m, 3H), 1.58 – 1.44 (m, 2H), 1.41 – 1.35 (m, 2H), 0.81 – 0.75 (m, 6H).  $^{13}\text{C}$  NMR (125 MHz, DMSO- $d_6$ )  $\delta$  173.1, 173.1, 170.5, 156.8, 156.1, 147.9, 136.8, 130.6, 129.4, 129.0, 127.9, 126.2, 123.5, 121.9, 115.3, 113.6, 62.1, 56.7, 55.3, 52.3, 50.6, 49.1, 37.2, 24.5, 23.1, 21.7.

HRMS (ESI)  $[\text{M}+\text{H}]^+$  found  $m/z$  523.2554, calcd for  $\text{C}_{28}\text{H}_{35}\text{N}_4\text{O}_6$  523.2551.  $[\alpha]_D^{20}$  -7.2 (c = 0.107,  $\text{CH}_3\text{OH}$ ).

**(S)-N-(4-(hydroxymethyl)phenyl)-2-((S)-3-methyl-2-(quinolin-2-ylamino)butanamido)-5-ureidopentanamide (8d)**. Following the procedure of **6** starting from Val-Cit-PAB-OH, the product **8d** was obtained as a white solid (yield 56% for 2 steps).  $^1\text{H}$  NMR (400 MHz, MeOD- $d_4$ )  $\delta$  7.87 (d,  $J = 8.9$  Hz, 1H), 7.63 – 7.58 (m, 2H), 7.47 (ddd,  $J = 8.4, 7.0, 1.4$  Hz, 1H), 7.39 (d,  $J = 8.5$  Hz, 2H), 7.25 (d,  $J = 8.6$  Hz, 2H), 7.22 – 7.17 (m, 1H), 6.91 (d,  $J = 8.9$  Hz, 1H), 4.58 – 4.53 (m, 3H), 4.49 (d,  $J = 7.5$  Hz, 1H), 3.37 (s, 2H), 3.09 (dt,  $J = 13.3, 6.7$  Hz, 1H), 2.99 (dt,  $J = 13.5, 6.7$  Hz, 1H), 2.30 – 2.19 (m, 1H), 1.94 – 1.84 (m, 1H), 1.80 – 1.68 (m, 1H), 1.60 – 1.43 (m, 2H), 1.11 (d,  $J = 6.9$  Hz, 3H), 1.09 (d,  $J = 6.8$  Hz, 3H).  $^{13}\text{C}$  NMR (125 MHz, MeOD- $d_4$ )  $\delta$  174.4, 170.9, 160.8, 157.0, 147.4, 137.4, 137.0, 136.9, 129.0, 127.1, 127.1, 125.4, 123.6, 121.9, 120.0, 112.6, 63.4, 60.9, 53.4, 48.4, 30.4, 29.3, 26.3, 18.7, 17.9. HRMS (ESI)  $[\text{M}+\text{H}]^+$  found  $m/z$  507.2724,

calcd for  $\text{C}_{27}\text{H}_{35}\text{N}_6\text{O}_4$  507.2714.  $[\alpha]_D^{20}$  -186.3 (c = 0.096,  $\text{CH}_3\text{OH}$ ).

**(S)-2-((S)-2-((7-(2-fluorophenyl)-4-methylquinolin-2-yl)amino)-3-methylbutanamido)-N-(4-(hydroxymethyl)phenyl)-5-ureidopentanamide (8e)**. Following the procedure of **6** starting from Val-Cit-PAB-OH, the product **8e** was obtained as a white solid (yield 52% for 2 steps).  $^1\text{H}$  NMR (500 MHz, MeOD- $d_4$ )  $\delta$  7.88 (d,  $J = 8.4$  Hz, 1H), 7.80 (s, 1H), 7.51 (t,  $J = 7.8$  Hz, 1H), 7.44 (d,  $J = 8.4$  Hz, 1H), 7.42 – 7.37 (m, 1H), 7.33 (d,  $J = 8.5$  Hz, 2H), 7.28 (t,  $J = 7.5$  Hz, 1H), 7.24 – 7.21 (m, 1H), 7.20 (d,  $J = 8.4$  Hz, 2H), 6.82 (s, 1H), 4.56 (dd,  $J = 9.0, 5.1$  Hz, 1H), 4.52 (s, 2H), 4.48 (d,  $J = 7.4$  Hz, 1H), 3.11 – 3.04 (m, 1H), 3.01 – 2.94 (m, 1H), 2.61 (s, 3H), 2.31 – 2.22 (m, 1H), 1.89 (dt,  $J = 14.3, 6.6$  Hz, 1H), 1.78 – 1.68 (m, 1H), 1.57 – 1.47 (m, 2H), 1.13 (d,  $J = 6.8$  Hz, 3H), 1.11 (d,  $J = 6.8$  Hz, 3H).  $^{13}\text{C}$  NMR (125 MHz, MeOD- $d_4$ )  $\delta$  175.8, 172.3, 162.2, 160.3, 158.7, 148.8, 146.2, 138.8, 138.3, 137.9, 132.1, 130.5, 130.4, 128.4, 127.4, 125.7, 124.8, 124.6, 124.1, 121.5, 117.2, 117.0, 114.2, 64.8, 62.4, 54.8, 31.7, 30.7, 27.7, 20.1, 19.3, 18.7. HRMS (ESI)

$[\text{M}+\text{H}]^+$  found  $m/z$  615.3081, calcd for  $\text{C}_{34}\text{H}_{40}\text{FN}_6\text{O}_4$  615.309.  $[\alpha]_D^{20}$  -0.8 (c = 0.105,  $\text{CH}_3\text{OH}$ ).

**(S)-1-((4R,7S,10S,13S,16S,19S)-7-(2-amino-2-oxoethyl)-10-(3-amino-3-oxopropyl)-13-((S)-sec-butyl)-16-(4-hydroxybenzyl)-6,9,12,15,18-pentaazo-19-(quinolin-2-ylamino)-1,2-dithia-5,8,11,14,17-pentaazacycloicosane-4-carbonyl)-N-((S)-1-((2-amino-2-oxoethyl)amino)-4-methyl-1-oxopentan-2-yl)pyrrolidine-2-carboxamide (8f)**. Following the procedure of **6** starting from oxytocin, the product **8f** was obtained as a white solid (yield 42% for 2 steps).  $^1\text{H}$  NMR (400 MHz, MeOD- $d_4$ )  $\delta$  8.36 (d,  $J = 9.2$  Hz, 1H), 7.96 (d,  $J = 7.8$  Hz, 1H), 7.89 (t,  $J = 7.8$  Hz, 1H), 7.74 (d,  $J = 8.3$  Hz, 1H), 7.61 (t,  $J = 7.4$  Hz, 1H), 7.00 (d, 4H), 6.18 (s, 1H), 5.17 (s, 1H), 4.87 (d,  $J = 6.8$  Hz, 2H), 4.50 – 4.42 (m, 1H), 4.31 (dd,  $J = 9.4, 5.4$  Hz, 1H), 4.07 (d,  $J = 6.5$  Hz, 1H), 3.95 (d,  $J = 7.6$  Hz, 1H), 3.91 (d,  $J = 17.1$  Hz, 1H), 3.81 (d,  $J = 8.4$  Hz, 1H), 3.76 (d,  $J = 17.0$  Hz, 1H), 3.68 (dt,  $J = 10.4, 5.7$  Hz, 1H), 3.42 (dt,  $J = 13.6, 4.3$  Hz, 2H), 3.37 (s, 4H), 2.91 (s, 1H), 2.71 (s, 1H), 2.39 (t,  $J = 6.9$  Hz, 2H), 2.31 – 2.14 (m, 3H), 2.03 – 1.83 (m, 4H), 1.68 (qd,  $J = 9.7, 9.3, 5.1$  Hz, 4H), 1.37 – 1.24 (m, 1H), 1.05 (d,  $J = 6.7$  Hz, 3H), 1.00 (t,  $J = 7.4$  Hz, 3H), 0.94 (d,  $J = 6.3$  Hz,

3H), 0.91 (d,  $J = 6.1$  Hz, 3H).  $^{13}\text{C}$  NMR (125 MHz, MeOD- $d_4$ )  $\delta$  176.6, 173.7, 173.5, 173.2, 172.9, 172.1, 168.4, 167.7, 157.7, 157.4, 155.6, 133.1, 129.8, 128.7, 127.2, 125.9, 121.8, 117.7, 115.8, 114.4, 113.5, 61.0, 60.8, 55.8, 54.9, 53.6, 53.0, 52.3, 50.6, 48.5, 48.2, 41.9, 39.7, 37.7, 35.7, 31.4, 29.0, 25.6, 24.5, 24.5, 22.1, 20.5, 14.6, 10.2. HRMS (ESI)  $[\text{M}+\text{H}]^+$  found  $m/z$  1132.4742, calcd for **10**

$\text{C}_{52}\text{H}_{70}\text{N}_{13}\text{O}_{12}\text{S}_2$  1132.4742.  $[\alpha]_D$  -110.2 ( $c = 0.077$ ,  $\text{CH}_3\text{OH}$ ).

**(S)-N-((S)-1-amino-3-hydroxy-1-oxopropan-2-yl)-1-(quinolin-2-yl-D-tyrosyl-L-alanyl-D-phenylalanyl-glycyl-D-tyrosyl)pyrrolidine-2-carboxamide (8g)**. Following the procedure of **6** starting from dermorphin, the product **8g** was obtained as a white solid (yield 47% for 2 steps).  $^1\text{H}$  NMR (400 MHz, DMSO- $d_6$ )  $\delta$  9.25 (s, 1H), 9.17 (s, 1H), 8.27 (d,  $J = 8.0$  Hz, 1H), 8.20 (s, 1H), 8.12 (d,  $J = 8.6$  Hz, 1H), 8.00 (d,  $J = 6.9$  Hz, 1H), 7.82 (d,  $J = 8.9$  Hz, 1H), 7.75 (d,  $J = 7.4$  Hz, 1H), 7.59 (d,  $J = 7.6$  Hz, 1H), 7.49 (d,  $J = 7.8$  Hz, 1H), 7.46 – 7.38 (m, 1H), 7.18 (dd,  $J = 13.4, 5.1$  Hz, 5H), 7.12 (d,  $J = 7.5$  Hz, 3H), 7.10 – 7.05 (m, 3H), 6.85 (d,  $J = 8.9$  Hz, 1H), 6.66 (d,  $J = 8.2$  Hz, 2H), 6.62 (d,  $J = 8.0$  Hz, 2H), 4.91 (t,  $J = 5.3$  Hz, 1H), 4.74 (d,  $J = 4.4$  Hz, 1H), 4.60 (s, 1H), 4.47 (s, 1H), 4.35 (d,  $J = 6.0$  Hz, 1H), 4.26 – 4.04 (m, 2H), 3.78 – 3.69 (m, 1H), 3.68 – 3.54 (m, 4H), 2.97 (d,  $J = 10.9$  Hz, 3H), 2.87 – 2.76 (m, 1H), 2.69 – 2.60 (m, 1H), 2.57 (d,  $J = 12.8$  Hz, 1H), 1.93 (d,  $J = 51.9$  Hz, 4H), 0.82 (d,  $J = 6.9$  Hz, 3H).  $^{13}\text{C}$  NMR (125 MHz, DMSO- $d_6$ )  $\delta$  172.5, 172.3, 172.3, 171.6, 171.6, 171.0, 168.8, 156.6, 156.3, 156.1, 147.9, 138.2, 136.8, 130.7, 130.6, 129.6, 129.5, 128.8, 128.4, 128.1, 127.8, 126.6, 126.2, 123.5, 121.9, 115.5, 115.3, 113.6, 62.0, 60.4, 56.5, 55.5, 54.1, 53.1, 48.5, 47.4, 42.0, 38.1, 37.5, 36.7, 29.3, 24.9, 18.8. HRMS (ESI) **10**

$[\text{M}+\text{H}]^+$  found  $m/z$  928.3993, calcd for  $\text{C}_{49}\text{H}_{54}\text{N}_9\text{O}_{10}$  928.3999.  $[\alpha]_D$  -19.9 ( $c = 0.098$ ,  $\text{CH}_3\text{OH}$ ).

**(4R,7S,10S,13R,16S,19R)-13-((1H-indol-3-yl)methyl)-10-(4-aminobutyl)-16-benzyl-N-(1,3-dihydroxybutan-2-yl)-7-((R)-1-hydroxyethyl)-6,9,12,15,18-pentaoxo-19-((R)-3-phenyl-2-(quinolin-2-ylamino)propanamido)-1,2-dithia-5,8,11,14,17-pentaazacycloicosane-4-carboxamide (8h)**. Following the procedure of **6** starting from otreotide, the product **8h** was obtained as a white solid (yield 41% for 2 steps).  $^1\text{H}$  NMR (500 MHz, Methanol- $d_4$ )  $\delta$  8.27 (d,  $J = 9.4$  Hz, 1H), 7.85 (d,  $J = 7.9$  Hz, 1H), 7.78 (dd,  $J = 14.4, 7.1$  Hz, 2H), 7.52 (t,  $J = 7.8$  Hz, 1H), 7.48 (d,  $J = 7.9$  Hz, 1H), 7.40 – 7.35 (m, 3H), 7.27 – 7.22 (m, 3H), 7.19 (t,  $J = 7.9$  Hz, 4H), 7.16 – 7.10 (m, 3H), 7.04 (t,  $J = 7.4$  Hz, 1H), 7.00 (s, 1H), 5.25 (d,  $J = 9.4$  Hz, 2H), 4.68 (dd,  $J = 8.8, 6.2$  Hz, 1H), 4.49 (d,  $J = 5.6$  Hz, 1H), 4.38 – 4.32 (m, 1H), 4.23 (dd,  $J = 11.0, 5.3$  Hz, 1H), 4.17 (dd,  $J = 6.4, 2.8$  Hz, 1H), 4.02 (dd,  $J = 10.9, 3.2$  Hz, 1H), 3.89 – 3.85 (m, 1H), 3.74 (s, 2H), 3.50 (d,  $J = 9.2$  Hz, 1H), 3.33 (s, 2H), 3.18 – 2.90 (m, 8H), 2.86 (dd,  $J = 13.8, 5.2$  Hz, 1H), 2.61 (dq,  $J = 18.7, 12.4$  Hz, 2H), 1.35 – 1.23 (m, 9H), 0.62 – 0.43 (m, 2H).  $^{13}\text{C}$  NMR (125 MHz, MeOD- $d_4$ )  $\delta$  173.9, 173.2, 171.2, 171.0, 170.9, 168.8, 152.3, 136.3, 136.2, 135.4, 129.0, 128.7, 128.2, 128.1, 127.6, 126.9, 126.7, 126.1, 125.3, 123.1, 121.1, 120.8, 118.3, 117.7, 110.7, 108.4, 66.8, 61.2, 59.3, 57.0, 56.1, 55.8, 54.5, 53.3, 53.0, 52.2, 48.2, 38.8, 38.6, 38.5, 29.5, 26.0, 25.5, 21.5, 18.7, 18.4. **10**

HRMS (ESI)  $[\text{M}+\text{H}]^+$  found  $m/z$  1146.4891, calcd for  $\text{C}_{58}\text{H}_{72}\text{N}_{11}\text{O}_{10}\text{S}_2$  1146.49.  $[\alpha]_D$  -31.8 ( $c = 0.067$ ,  $\text{CH}_3\text{OH}$ ).

**(4R,7S,10S,13R,16S,19R)-13-((1H-indol-3-yl)methyl)-10-(4-aminobutyl)-16-benzyl-N-(1,3-dihydroxybutan-2-yl)-7-((R)-1-hydroxyethyl)-19-((R)-2-((6-methoxyquinolin-2-yl)amino)-3-phenylpropanamido)-6,9,12,15,18-pentaoxo-1,2-dithia-5,8,11,14,17-pentaazacycloicosane-4-carboxamide (8i)**. Following the procedure of **6** starting from otreotide, the product **8i** was

obtained as a white solid (yield 46% for 2 steps). <sup>1</sup>H NMR (500 MHz, Methanol-*d*<sub>4</sub>) δ 8.35 (d, *J* = 9.4 Hz, 1H), 8.23 (d, *J* = 8.7 Hz, 1H), 8.14 – 8.00 (m, 2H), 7.84 (d, *J* = 27.0 Hz, 1H), 7.71 – 7.64 (m, 2H), 7.51 (d, *J* = 8.0 Hz, 1H), 7.42 (d, *J* = 7.6 Hz, 2H), 7.39 (d, *J* = 8.1 Hz, 1H), 7.31 (t, *J* = 7.5 Hz, 2H), 7.27 – 7.19 (m, 5H), 7.18 – 7.13 (m, 2H), 7.08 (dd, *J* = 8.4, 6.7 Hz, 3H), 7.02 (s, 1H), 5.30 (t, *J* = 12.2 Hz, 2H), 4.71 (dd, *J* = 8.9, 6.0 Hz, 1H), 4.54 – 4.47 (m, 1H), 4.44 – 4.33 (m, 1H), 4.25 (dd, *J* = 10.9, 5.4 Hz, 1H), 4.23 – 4.16 (m, 1H), 4.06 (dd, *J* = 11.0, 3.5 Hz, 1H), 3.89 (s, 4H), 3.77 (d, *J* = 5.2 Hz, 2H), 3.54 (dd, *J* = 14.0, 5.0 Hz, 1H), 3.39 (s, 2H), 3.23 – 2.94 (m, 8H), 2.89 (dd, *J* = 13.8, 5.3 Hz, 1H), 2.65 (tt, *J* = 20.1, 10.6 Hz, 2H), 1.28 (m, 9H), 0.69 – 0.50 (m, 2H). <sup>13</sup>C NMR (125 MHz, MeOD-*d*<sub>4</sub>) δ 174.2, 173.6, 171.6, 171.3, 169.2, 160.0, 152.5, 138.6, 136.6, 136.5, 135.8, 131.2, 129.5, 129.4, 129.3, 129.0, 128.4, 128.0, 127.8, 127.2, 127.1, 126.4, 125.2, 123.4, 122.0, 121.1, 118.6, 118.0, 114.2, 110.9, 108.8, 67.1, 59.7, 57.3, 56.4, 54.8, 54.4, 53.5, 53.3, 52.6, 48.4, 38.8, 31.6, 28.9, 26.3, 25.5, 22.3, 19.0, 13.0. HRMS (ESI) [M+H]<sup>+</sup> found *m/z* 1252.5299, **20**

calcd for C<sub>65</sub>H<sub>78</sub>N<sub>11</sub>O<sub>11</sub>S<sub>2</sub> 1252.5318. [α]<sub>D</sub> 1.8 (c = 0.055, CH<sub>3</sub>OH).

### 3. Biological studies

#### 3.1 Cell proliferation inhibition assay

The cancer cell lines BEL-7402 and SMMC-7721 were purchased from the American Type Culture Collection (Manassas, VA, USA). All cell lines were maintained in DMEM containing 10% fetal bovine serum at 37 °C and 5% CO<sub>2</sub> in a humid environment.

Tumor cells were seeded in the 96-wells plates overnight and then were treated with increasing doses of compounds in triplicate for 72 h. The anti-proliferative activities were accessed by SRB assay. Then the OD was measured at 510 nm wavelength using Synergy H4 Hybrid reader (BioTek, Winooski, VT, USA) using Gen5.0 software (BioTek). The IC<sub>50</sub> values were calculated using the software Prism 5 (GraphPad Software, Inc). The test results are shown in the following table.

**Table S1. Liver cancer cell proliferation inhibition assays of selected compounds**

| Compound  | Proliferation inhibition IC <sub>50</sub> (μM) |            |
|-----------|------------------------------------------------|------------|
|           | BEL-7402                                       | SMMC-7721  |
| YSL       | >100                                           | >100       |
| YSL-M     | >100                                           | >100       |
| <b>8c</b> | 52.57±2.47                                     | 63.30±6.35 |

#### 3.2 [<sup>35</sup>S]GTP<sub>γ</sub>S Binding Assay

Transfer 10 μl standard protein to a centrifuge tube (final concentration 0.5 mg/ml). Transfer the sample and 0, 1, 2, 4, 8, 12, 16, 20 μl bovine serum albumin (BSA) standard protein into the wells of a 96-well plate. The solution was supplemented to 20 μl using diluted standard. 200 μl of BCA working solution was added to each well then the plate was placed at 37 °C for 30 min. Meanwhile, set the plate reader to read absorption at 560 nm. The protein concentration was calculated from the standard curve.

The prepared membrane receptor is diluted to the desired concentration with a reaction buffer (R.B). Load according to the following table (unit: μl).

|            |     |                                                   |                            |             |         |                    |
|------------|-----|---------------------------------------------------|----------------------------|-------------|---------|--------------------|
|            | R.B | [ <sup>35</sup> S]GTP <sub>γ</sub> S<br>0.1-0.2nM | GTP <sub>γ</sub> S<br>20μM | GDP<br>40μM | Agonist | Protein<br>20-30μg |
| NS binding | 30  | 10                                                | 10                         | 0           | 0       | 50                 |
| Basal      | 30  | 10                                                | 0                          | 10          | 0       | 50                 |
| Agonist    | 20  | 10                                                | 0                          | 10          | 10      | 50                 |

The reaction tube was incubated for 1 hour in a 27 °C water bath, filtered under reduced pressure on a glass fiber membrane, and flash-counted. Calculate according to the following formula: [<sup>35</sup>S]GTP<sub>γ</sub>S binding rate =  $100 \times (\text{cpm}_{\text{sample}} - \text{cpm}_{\text{non-specific}}) / (\text{cpm}_{\text{basal}} - \text{cpm}_{\text{non-specific}})$

**Table S2. μ-opioid receptor (MOR) agonist activity assays**

| Compound   | (MOR) (mean±sem)      |                      |
|------------|-----------------------|----------------------|
|            | EC <sub>50</sub> (nM) | E <sub>max</sub> (%) |
| Dermorphin | 61.3±10.6             | 218.8±7.1            |
| <b>8g</b>  | 223.9±25.1            | 202.7±5.1            |

### 3.3 *In vitro* liver stability assessment

Adhering fat and connective tissue were removed from 5 g fresh pig liver. Wash it with cold saline, blot water on the surface with filter paper and weigh it. Add appropriate PBS buffer, cut the pig liver with scissor and make a 20 ml homogenate with a homogenizer with a frequency of 30/s for 4 min. Tested compound (final concentration 1 mg/ml and co-solvent (1% DMSO)) were added to 20 ml of pig liver homogenate, stir well and stand. Take 1 ml of the sample twice in the six time periods of 0.25 h, 0.5 h, 1 h, 1.5 h, 2 h and 3 h respectively and methanol (500μl) was added to terminate the reaction. After centrifugation (1000 rpm, 6 min), the supernatant was separated and extracted twice with 750 μl of water-saturated n-butanol. Then extracted samples were analyzed by HPLC. Reversed phase HPLC was carried out on an Agilent Zorbax SB-C18 column (5 μm, 4.6 × 250 mm) from Agilent, with a flow rate of 1 mL/min at 25 °C. The gradient conditions used are 50% A (MeOH), 50% B (H<sub>2</sub>O + 0.2% CH<sub>3</sub>COOH), to 95% A and 5% B in 16 min. Acquisition for the UV-DAD detector was set to 210, 254, and 280 nm.

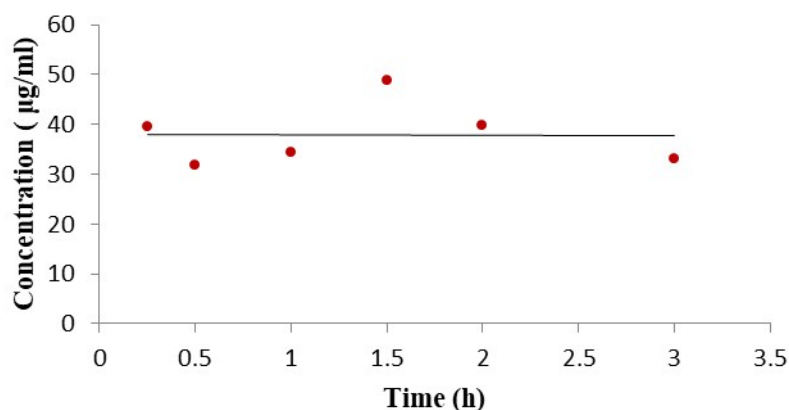

**Figure S2. The concentration of 8e changes with time**

## 4. DFT Studies

### 4.1 Computational Methods

All computations were performed with the Gaussian 09 <sup>[1]</sup> series of programs. All the structures were optimized using the density functional M06-2X methods <sup>[2]</sup> at the 6-311+G(d) level. A Solvent effects of 1-butanol were considered by using the SMD model <sup>[3]</sup>. Frequencies calculations were performed to judge them as local minima or transition states and obtain the thermal corrections to the Gibbs free energies and enthalpies. The Gibbs free energies were used to describe the reaction energies.

#### 4.2 M06-2X calculated energies for reported complexes and transition states

| Geometry  | E <sup>1</sup> | H <sup>2</sup> | G <sup>3</sup> | IF <sup>4</sup> |
|-----------|----------------|----------------|----------------|-----------------|
| <b>5a</b> | -669.441609    | -669.204898    | -669.255131    |                 |
| <b>7</b>  | -303.8408662   | -303.71088     | -303.749907    |                 |
| <b>TS</b> | -973.2815993   | -972.914091    | -972.981862    | -297.80         |
| <b>9</b>  | -973.288612    | -972.918828    | -972.986512    |                 |

<sup>1</sup>Single point energies calculated by M06-2X at the 6-311+g(d) level in 1-butanol solvent.

<sup>2</sup>Enthalpies calculated by M06-2X at the 6-311+g(d) level in 1-butanol solvent.

<sup>3</sup>Gibbs free energies calculated by M06-2X at the 6-311+g(d) level in 1-butanol solvent.

<sup>4</sup>M06-2X/6-311+g(d) calculated imaginary frequencies for transition states.

The unit of energy values in the above table are Hartree/Particle ( a.u. ).

#### 4.3 Cartesian coordinates of minimum energy structures

|                                 |                                 |
|---------------------------------|---------------------------------|
| <b>5a</b>                       | H -3.777000 -1.961000 -0.237000 |
| C 2.385000 -2.003000 0.303000   | H -2.900000 -2.794000 -1.543000 |
| C 1.076000 -1.576000 0.371000   | H -2.398000 -3.028000 0.154000  |
| C 0.807000 -0.217000 0.166000   | H -1.635000 -1.131000 1.294000  |
| C 1.840000 0.700000 -0.121000   |                                 |
| C 3.166000 0.225000 -0.184000   | <b>7</b>                        |
| C 3.434000 -1.107000 0.028000   | C 0.062000 0.527000 -0.008000   |
| H 2.606000 -3.053000 0.463000   | O 0.642000 1.615000 0.081000    |
| H 0.274000 -2.277000 0.572000   | N 0.707000 -0.641000 -0.051000  |
| C 1.510000 2.070000 -0.345000   | H 0.141000 -1.474000 -0.146000  |
| H 3.962000 0.930000 -0.400000   | C 2.154000 -0.724000 -0.004000  |
| H 4.453000 -1.472000 -0.019000  | H 2.443000 -1.772000 -0.026000  |
| C 0.224000 2.521000 -0.284000   | H 2.604000 -0.214000 -0.859000  |
| C -0.768000 1.573000 0.020000   | H 2.538000 -0.270000 0.911000   |
| H 2.314000 2.763000 -0.568000   | C -1.452000 0.462000 -0.096000  |
| H -0.060000 3.551000 -0.449000  | H -1.844000 1.175000 0.637000   |
| O -2.047000 1.838000 0.119000   | H -1.715000 0.848000 -1.085000  |
| C -2.725000 0.649000 0.608000   | N -1.977000 -0.892000 0.044000  |
| C -1.714000 -0.486000 0.415000  | H -2.116000 -1.116000 1.024000  |
| H -2.959000 0.822000 1.657000   | H -2.885000 -0.960000 -0.400000 |
| H -3.627000 0.507000 0.018000   |                                 |
| N -0.479000 0.291000 0.239000   | <b>TS</b>                       |
| O -1.894000 -1.226000 -0.750000 | C -4.323000 1.047000 -0.497000  |
| C -2.798000 -2.314000 -0.572000 | C -3.012000 1.247000 -0.097000  |

C -2.222000 0.136000 0.204000  
C -2.737000 -1.171000 0.103000  
C -4.069000 -1.339000 -0.302000  
C -4.856000 -0.243000 -0.602000  
H -4.938000 1.907000 -0.739000  
H -2.601000 2.248000 -0.028000  
C -1.886000 -2.287000 0.454000  
H -4.469000 -2.345000 -0.374000  
H -5.883000 -0.380000 -0.919000  
C -0.585000 -2.120000 0.758000  
C -0.049000 -0.778000 0.694000  
H -2.326000 -3.279000 0.473000  
H 0.082000 -2.931000 1.022000  
O 1.071000 -0.448000 1.336000  
C 1.057000 0.983000 1.585000  
C -0.182000 1.507000 0.848000  
H 0.978000 1.122000 2.662000  
H 1.983000 1.404000 1.202000  
N -0.912000 0.269000 0.656000  
O 0.082000 2.043000 -0.423000  
C 0.646000 3.348000 -0.371000  
H 1.647000 3.333000 0.071000  
H 0.716000 3.700000 -1.398000  
H 0.002000 4.022000 0.205000  
H -0.761000 2.213000 1.450000  
C 3.083000 -0.498000 -0.748000  
O 2.969000 0.713000 -0.946000  
N 4.150000 -1.040000 -0.155000  
H 4.172000 -2.036000 0.007000  
C 5.278000 -0.227000 0.270000  
H 6.027000 -0.880000 0.712000  
H 5.718000 0.296000 -0.581000  
H 4.964000 0.510000 1.011000  
C 2.013000 -1.464000 -1.226000  
H 2.279000 -1.767000 -2.244000  
H 1.985000 -2.364000 -0.607000  
N 0.714000 -0.800000 -1.190000  
H 0.803000 0.173000 -1.490000  
H 0.041000 -1.263000 -1.797000

9

C -4.369000 1.009000 -0.523000  
C -3.043000 1.228000 -0.171000  
C -2.230000 0.136000 0.136000  
C -2.744000 -1.174000 0.094000  
C -4.081000 -1.365000 -0.264000  
C -4.893000 -0.284000 -0.575000  
H -4.997000 1.858000 -0.768000  
H -2.641000 2.235000 -0.148000  
C -1.871000 -2.274000 0.484000  
H -4.476000 -2.376000 -0.287000  
H -5.928000 -0.443000 -0.853000  
C -0.560000 -2.103000 0.698000  
C 0.036000 -0.759000 0.463000  
H -2.320000 -3.253000 0.621000  
H 0.101000 -2.902000 1.013000  
O 1.076000 -0.412000 1.306000  
C 0.963000 0.992000 1.641000  
C -0.219000 1.515000 0.816000  
H 0.764000 1.066000 2.709000  
H 1.902000 1.484000 1.391000  
N -0.908000 0.288000 0.542000  
O 0.163000 2.087000 -0.421000  
C 0.702000 3.396000 -0.301000  
H 1.623000 3.402000 0.289000  
H 0.927000 3.737000 -1.310000  
H -0.029000 4.069000 0.158000  
H -0.847000 2.213000 1.378000  
C 3.086000 -0.524000 -0.694000  
O 2.958000 0.683000 -0.896000  
N 4.186000 -1.081000 -0.194000  
H 4.199000 -2.075000 -0.013000  
C 5.352000 -0.281000 0.143000  
H 5.132000 0.398000 0.969000  
H 6.157000 -0.951000 0.437000  
H 5.673000 0.304000 -0.720000  
C 1.966000 -1.480000 -1.082000  
H 2.113000 -1.783000 -2.120000  
H 1.930000 -2.371000 -0.456000  
N 0.683000 -0.747000 -0.990000  
H 0.853000 0.239000 -1.249000  
H -0.002000 -1.126000 -1.649000



## 5. References

- [1] Frisch, M. J.; Trucks, G. W.; Schlegel, H. B.; Scuseria, G. E.; Robb, M. A.; Cheeseman, J. R.; Scalmani, G.; Barone, V.; Mennucci, B.; Petersson, G. A.; Nakatsuji, H.; Caricato, M.; Li, X.; Hratchian, H. P.; Izmaylov, A. F.; Bloino, J.; Zheng, G.; Sonnenberg, J. L.; Hada, M.; Ehara, M.; Toyota, K.; Fukuda, R.; Hasegawa, J.; Ishida, M.; Nakajima, T.; Honda, Y.; Kitao, O.; Nakai, H.; Vreven, T.; Montgomery, J. A., Jr.; Peralta, J. E.; Ogliaro, F.; Bearpark, M.; Heyd, J. J.; Brothers, E.; Kudin, K. N.; Staroverov, V. N.; Keith, T.; Kobayashi, R.; Normand, J.; Raghavachari, K.; Rendell, A.; Burant, J. C.; Iyengar, S. S.; Tomasi, J.; Cossi, M.; Rega, N.; Millam, J. M.; Klene, M.; Knox, J. E.; Cross, J. B.; Bakken, V.; Adamo, C.; Jaramillo, J.; Gomperts, R.; Stratmann, R. E.; Yazyev, O.; Austin, A. J.; Cammi, R.; Pomelli, C.; Ochterski, J. W.; Martin, R. L.; Morokuma, K.; Zakrzewski, V. G.; Voth, G. A.; Salvador, P.; Dannenberg, J. J.; Dapprich, S.; Daniels, A. D.; Farkas, Ö.; Foresman, J. B.; Ortiz, J. V.; Cioslowski, J.; Fox, D. J. *Gaussian 09*, Revision D.01; Gaussian, Inc.: Wallingford, CT, 2013.
- [2] Zhao Y., Truhlar D. G.; *Theoretical Chemistry Accounts*, **2008**, 120, 215-241.
- [3] Marenich A. V., Cramer C. J., Truhlar D. G. *J. Phys. Chem. B*, **2009**, 113, 6378-6396.

## 6. NMR spectra of products

EO-LP-01-44-11

<sup>1</sup>H NMR for **6**

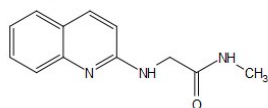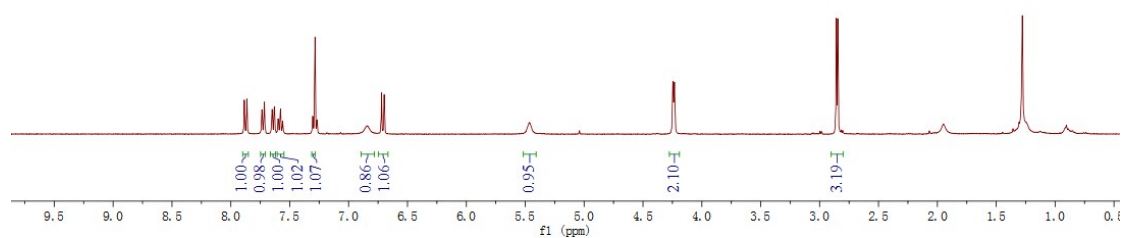

EO-LP-01-44-20181103/3

EO-LP-01-44-20181103 CDC13 BBPT135

<sup>13</sup>C NMR for **6**

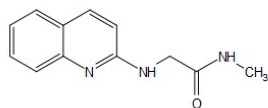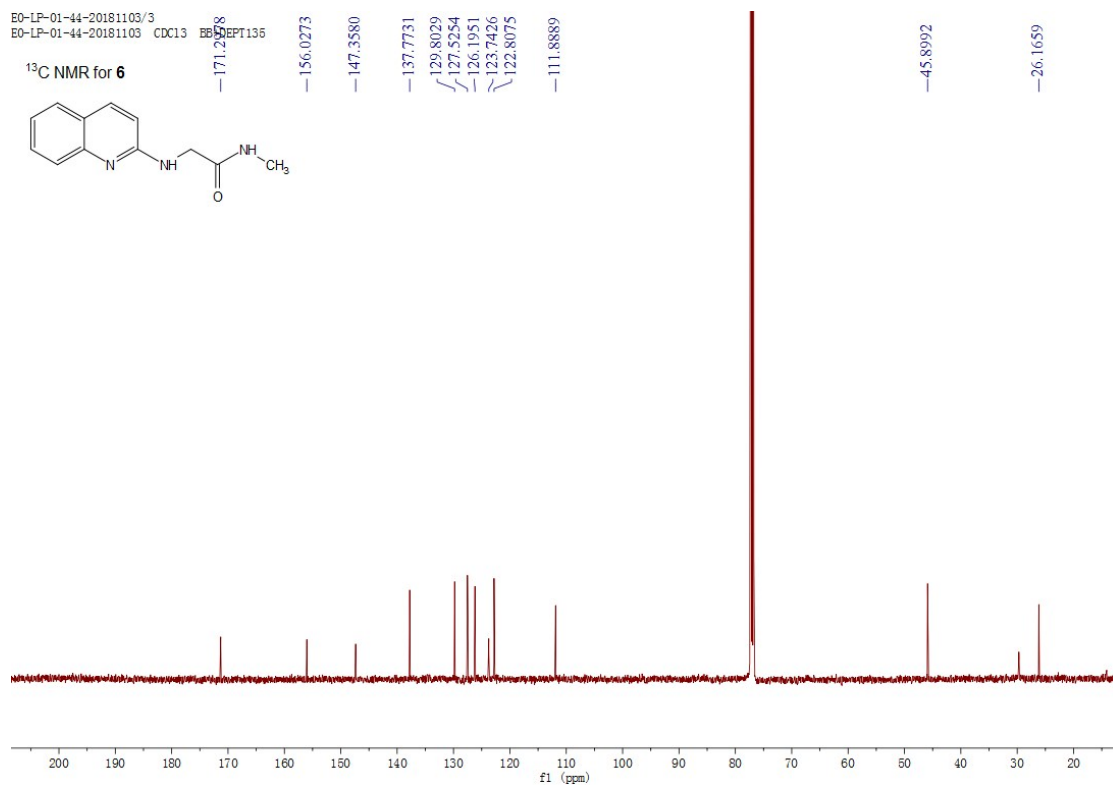

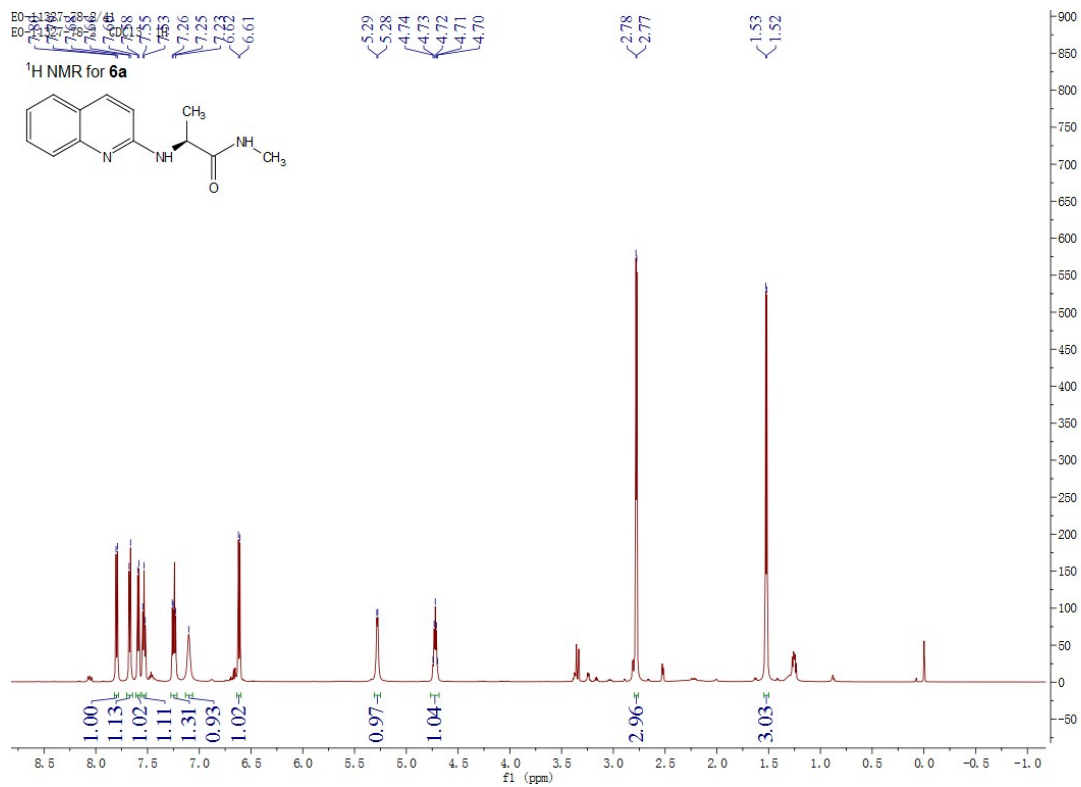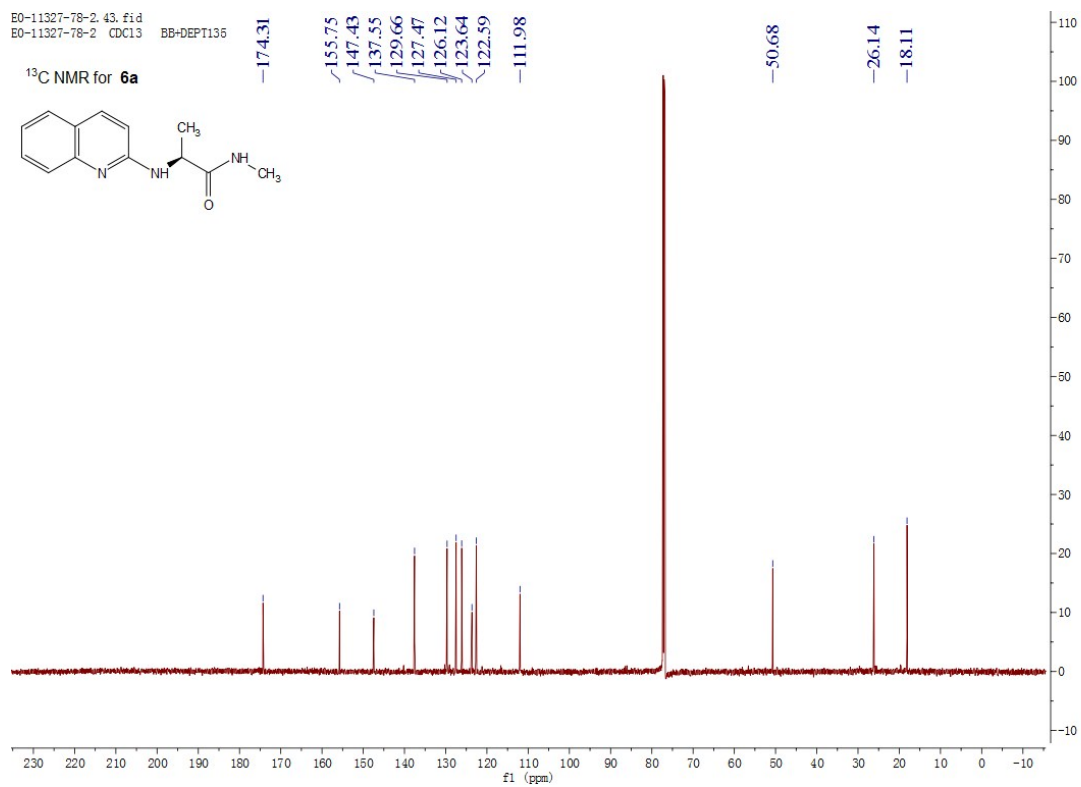

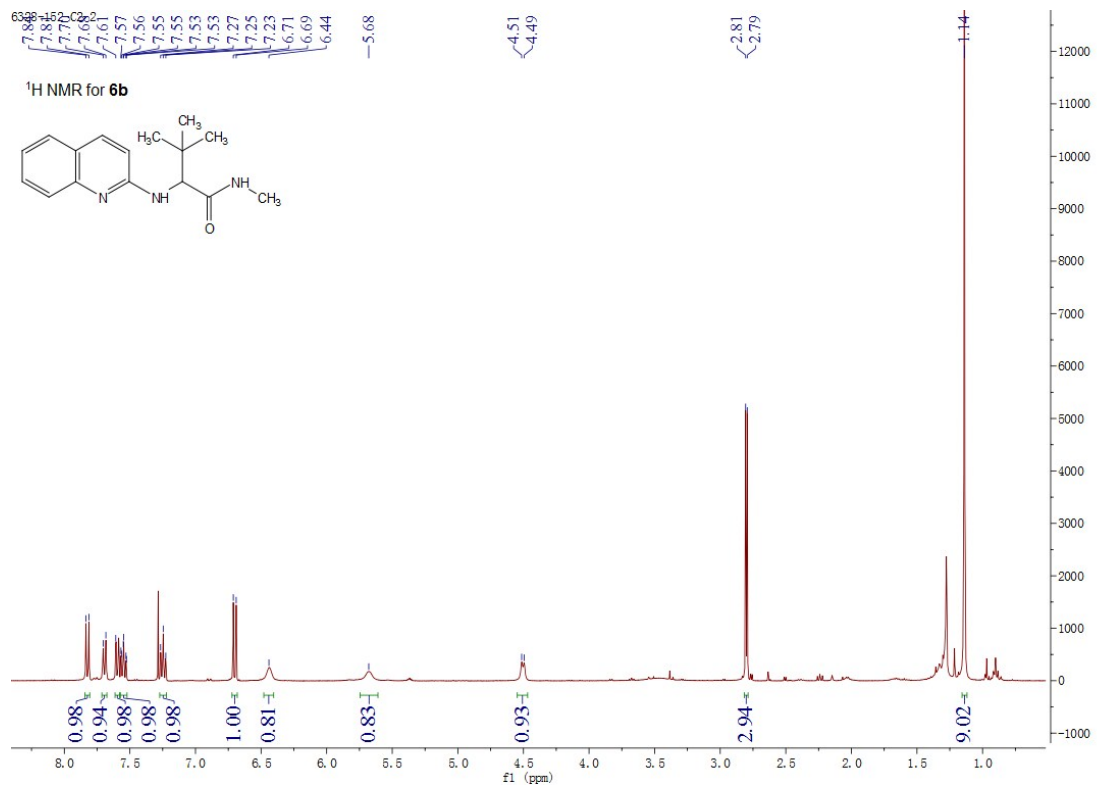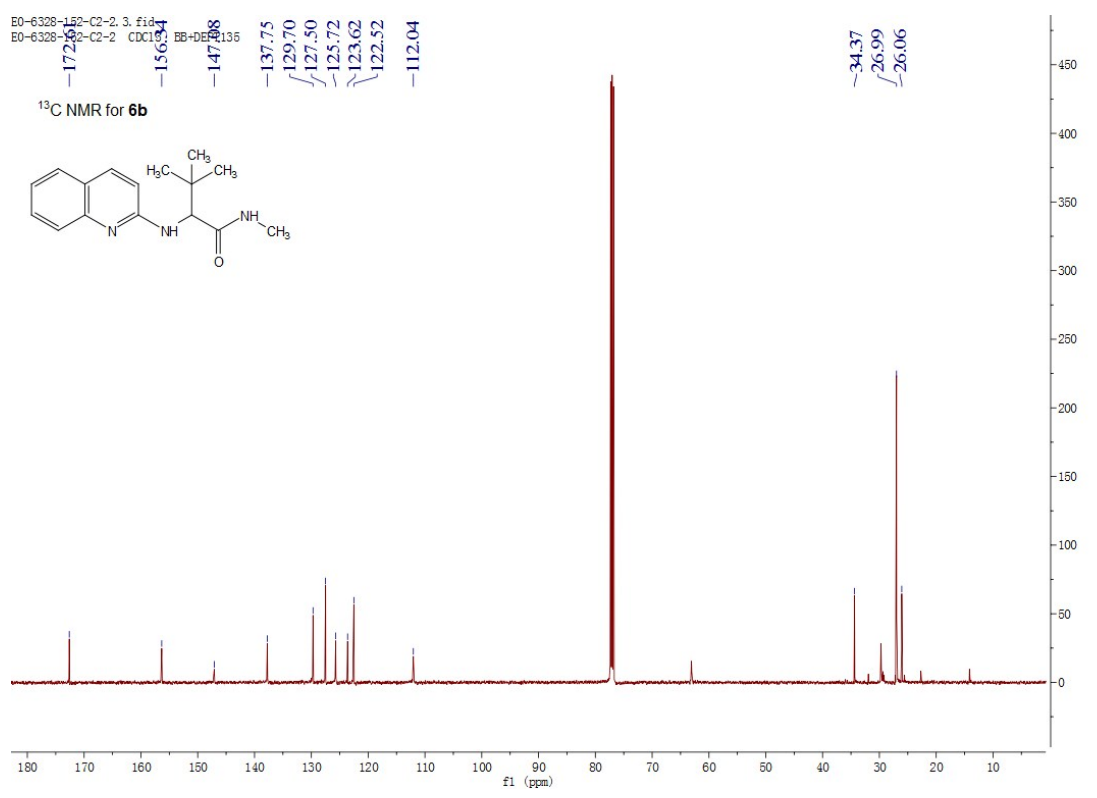

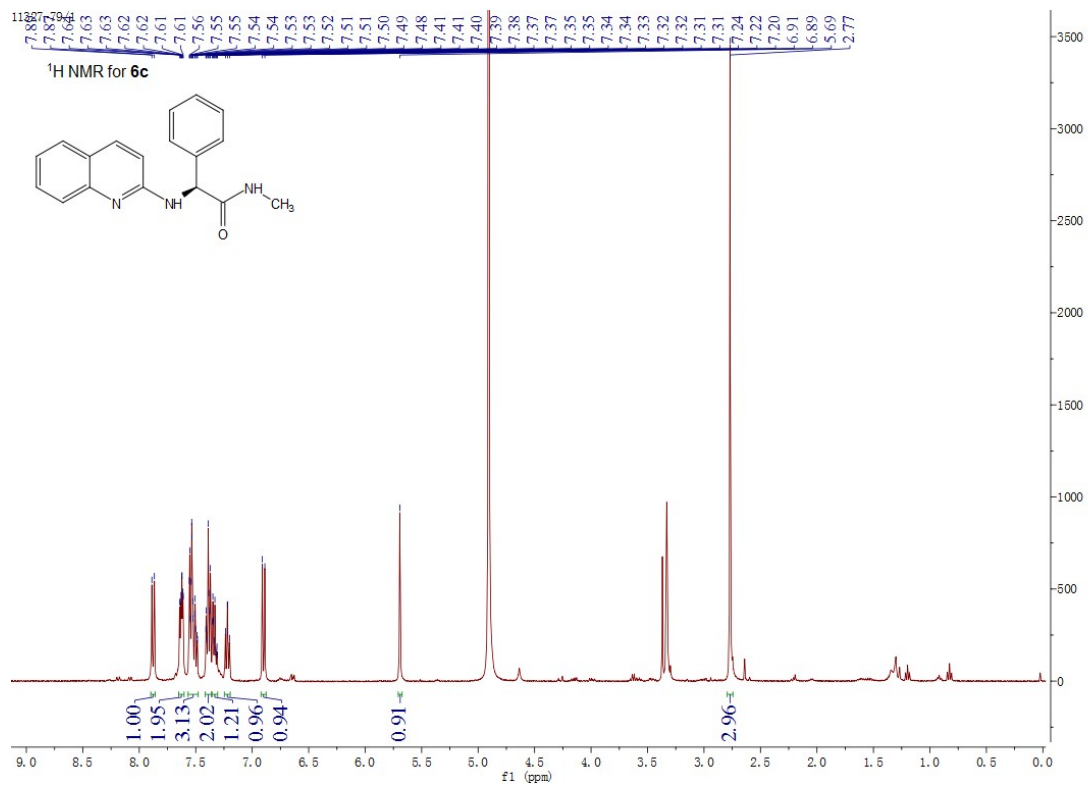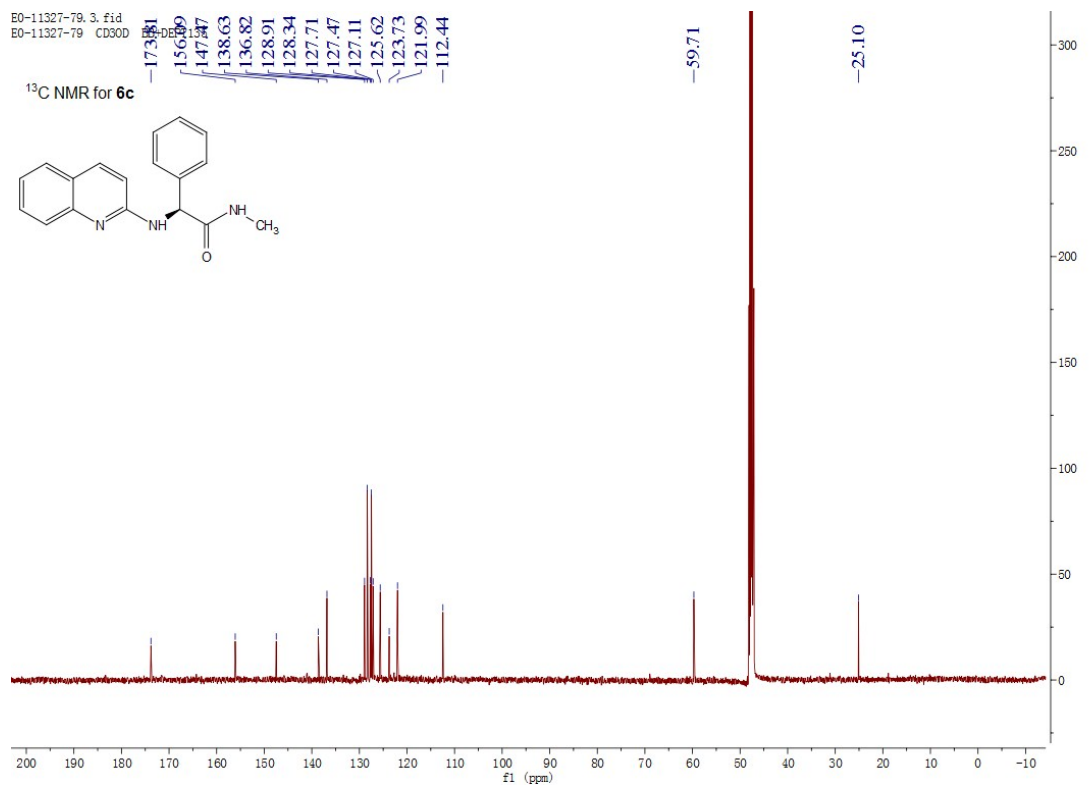

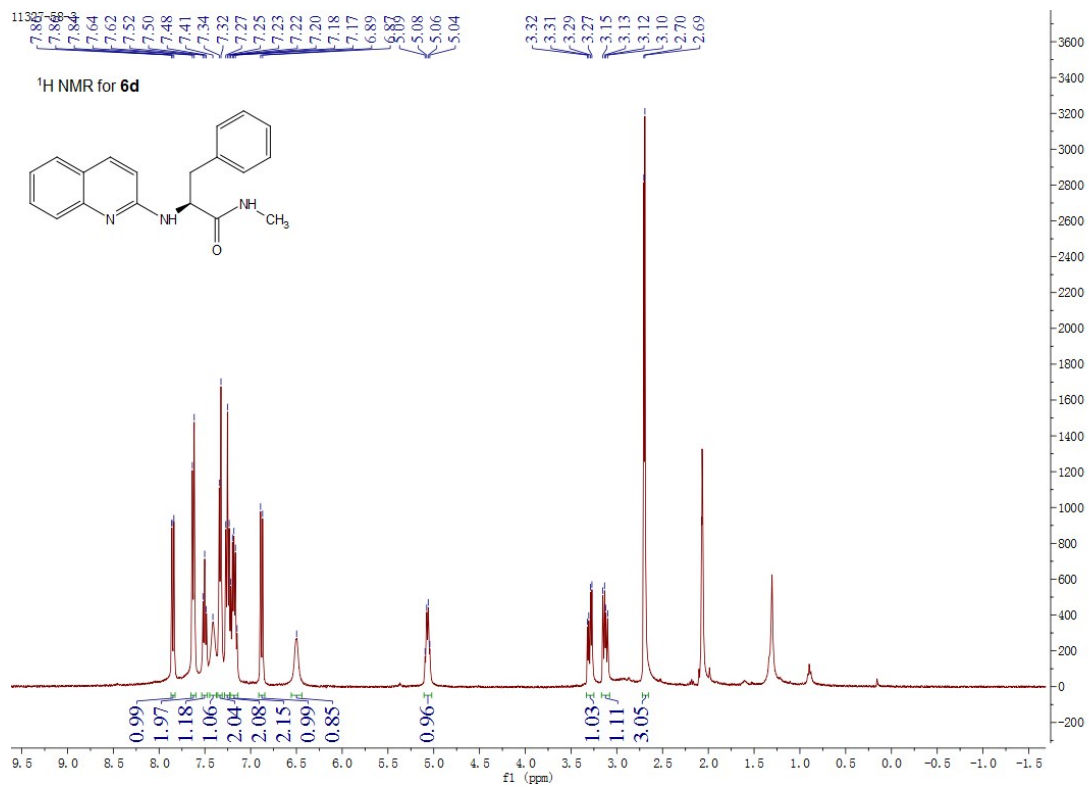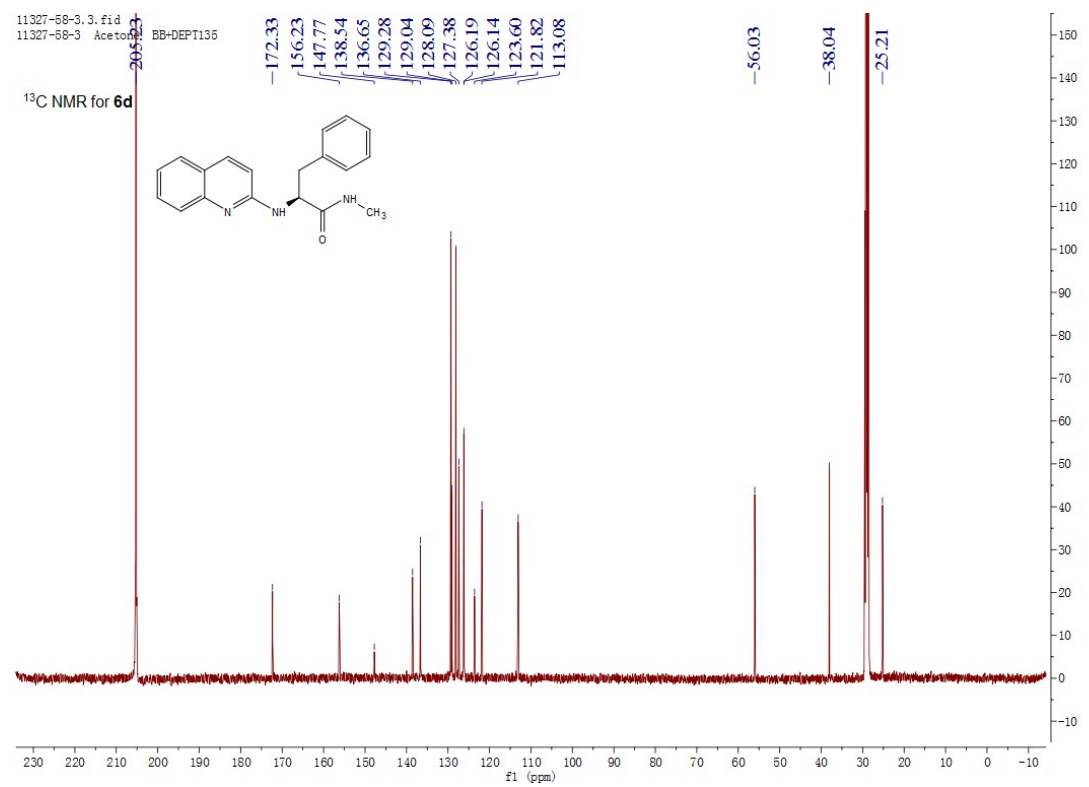

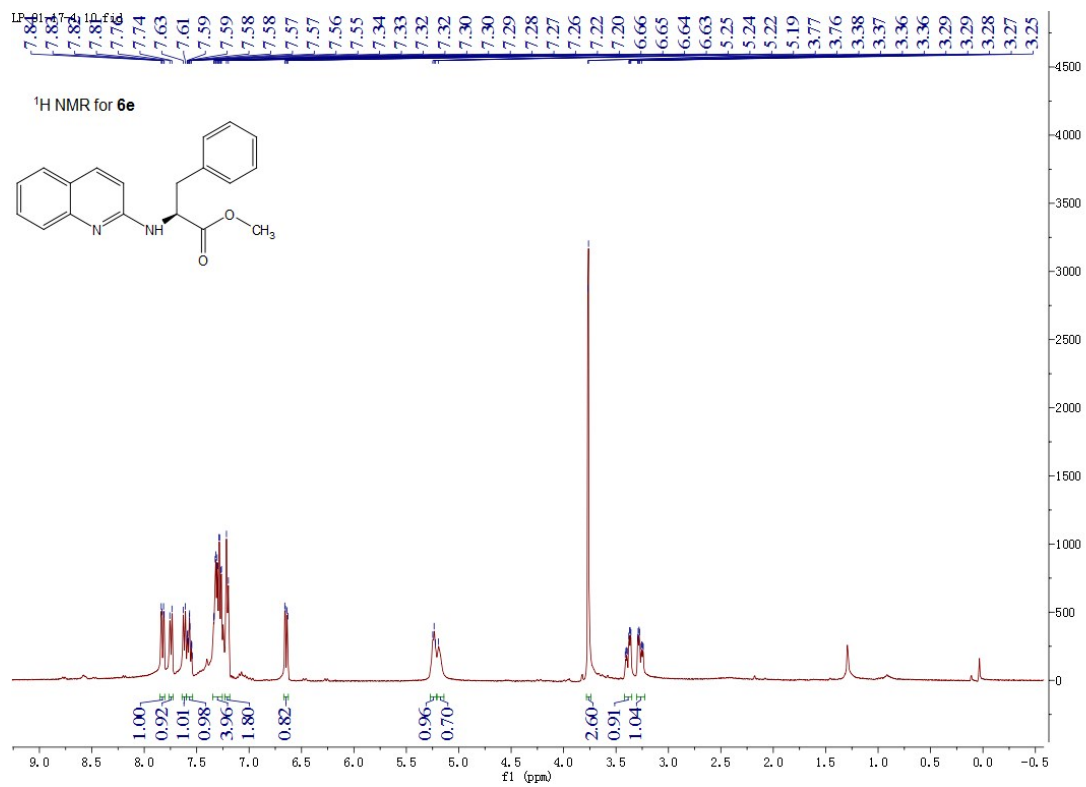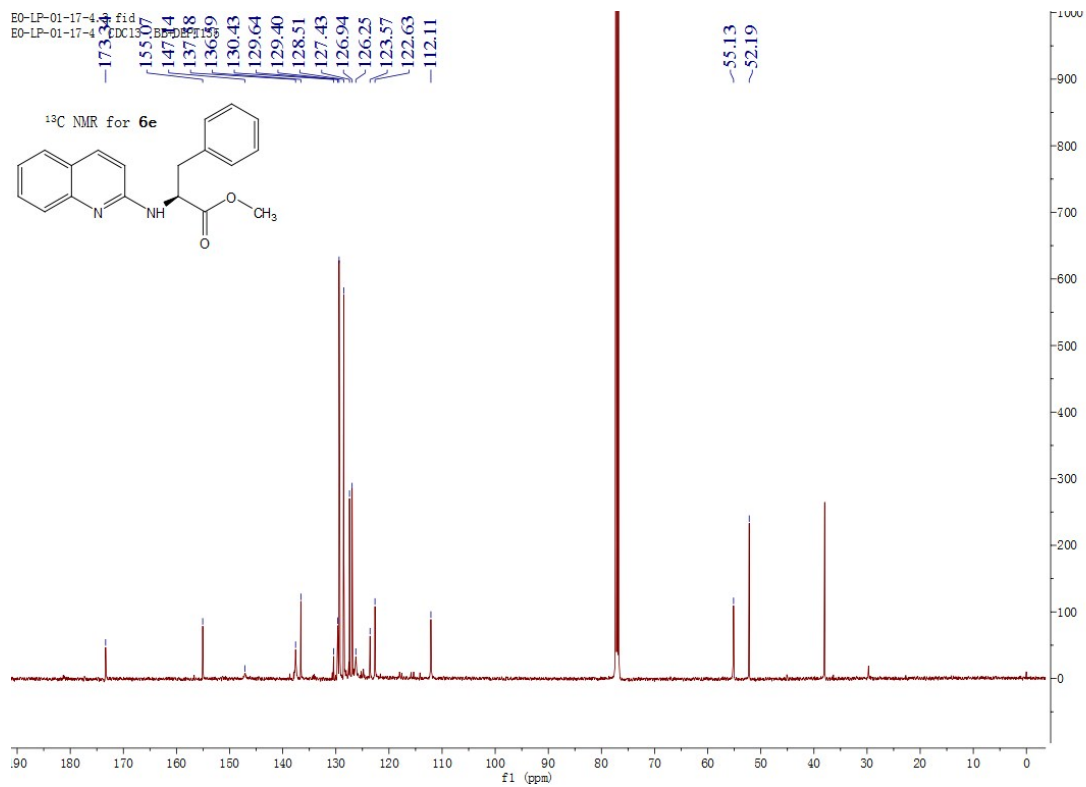

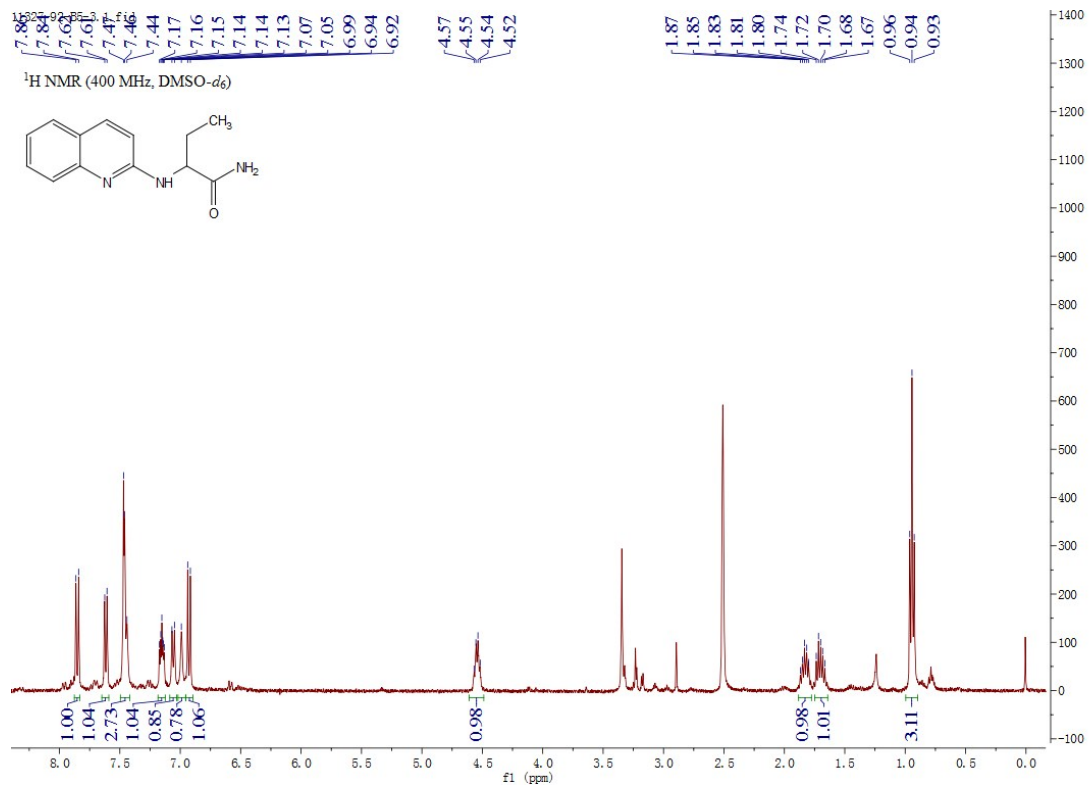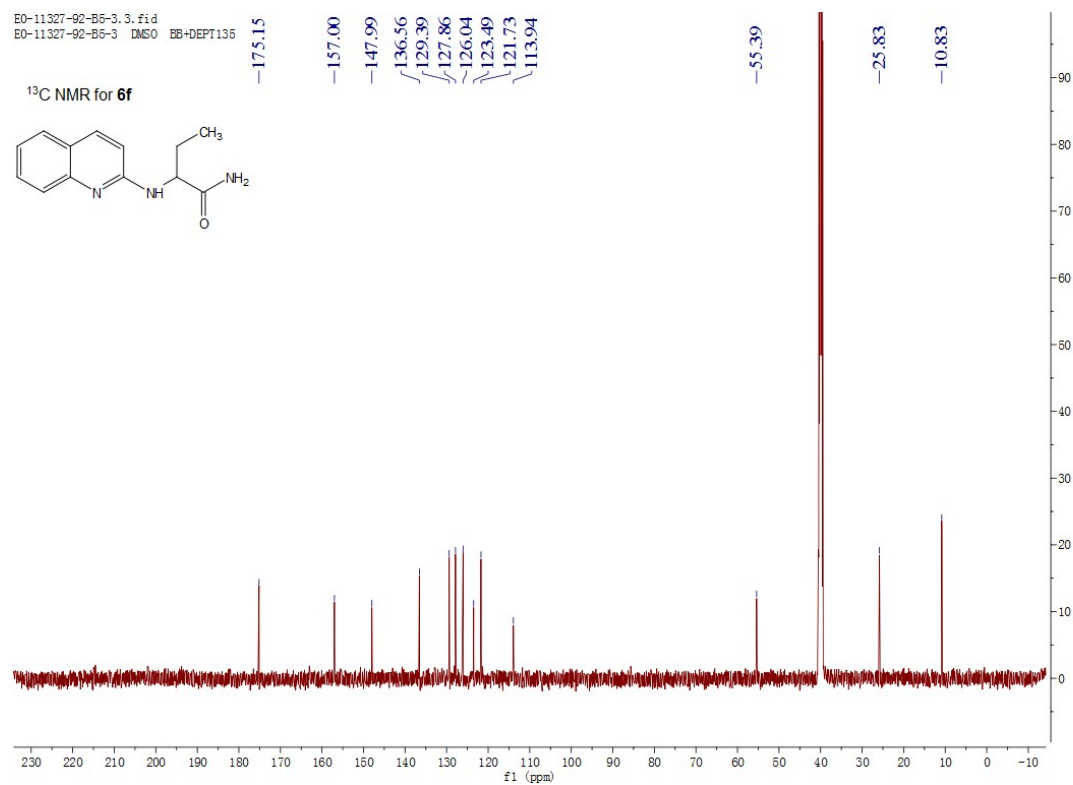



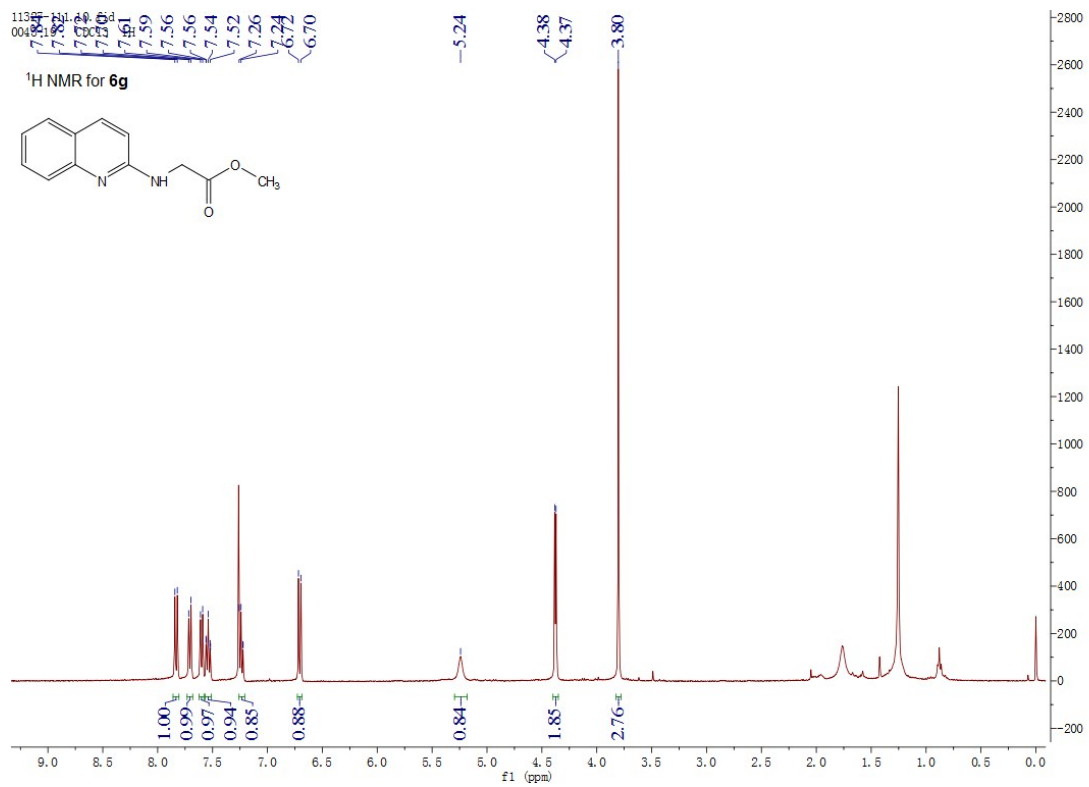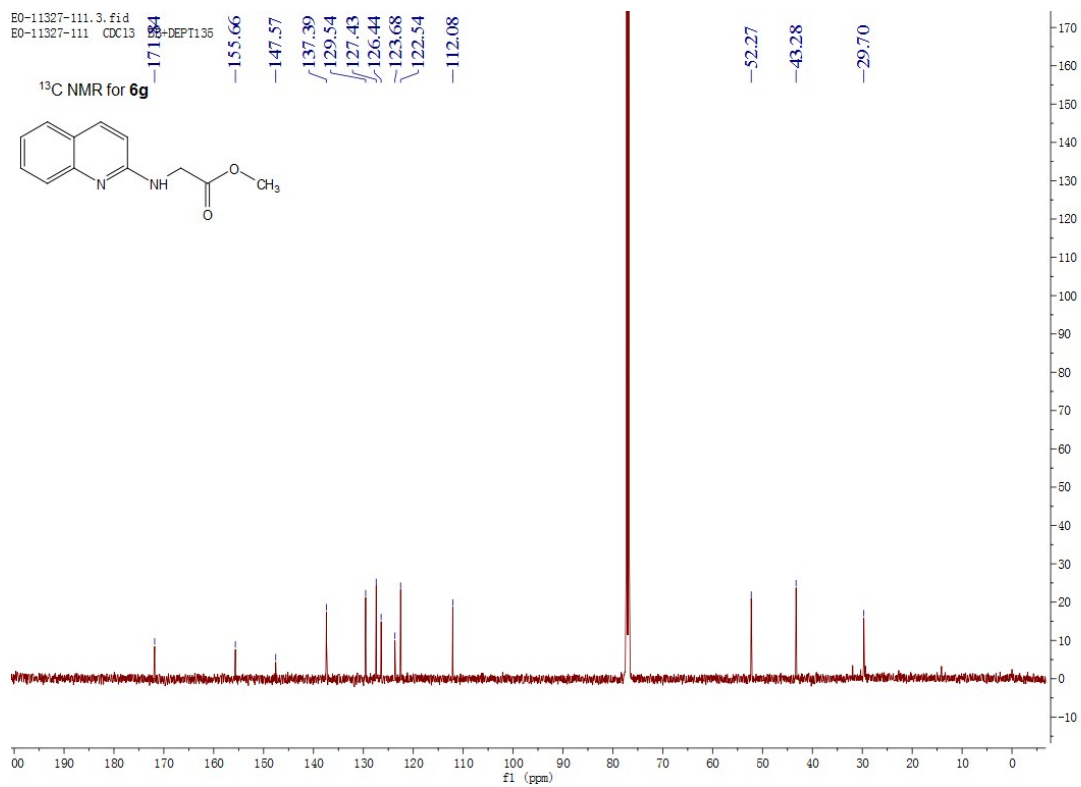

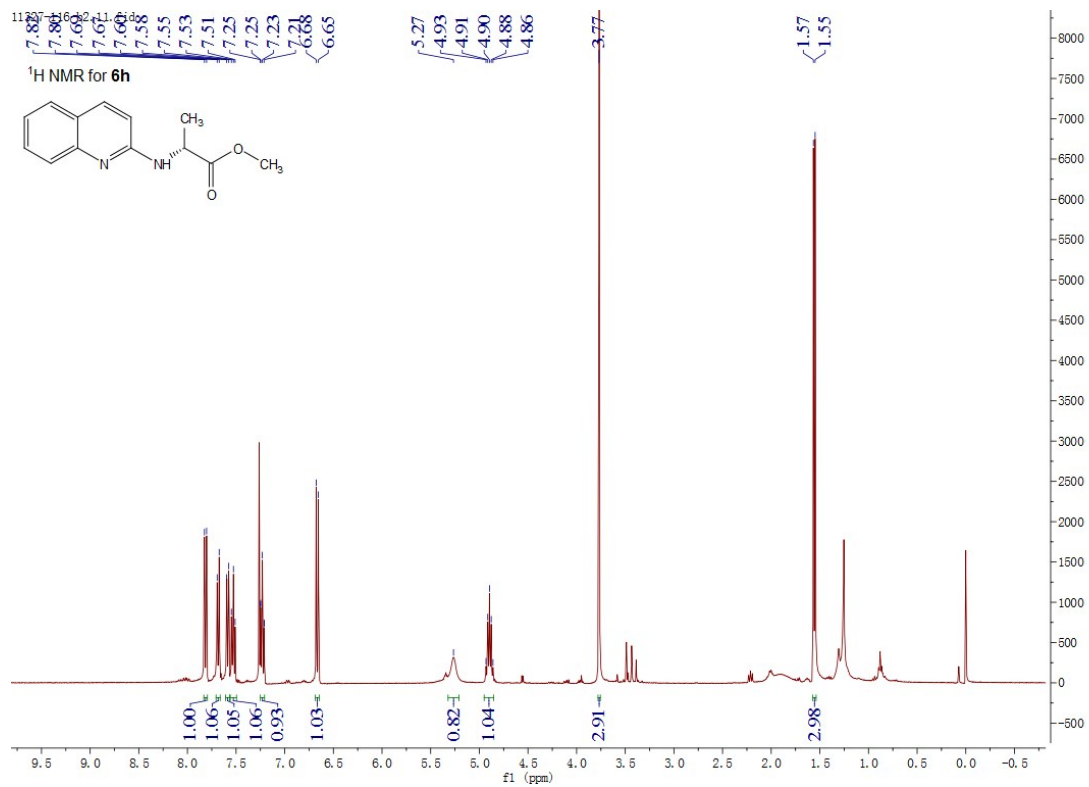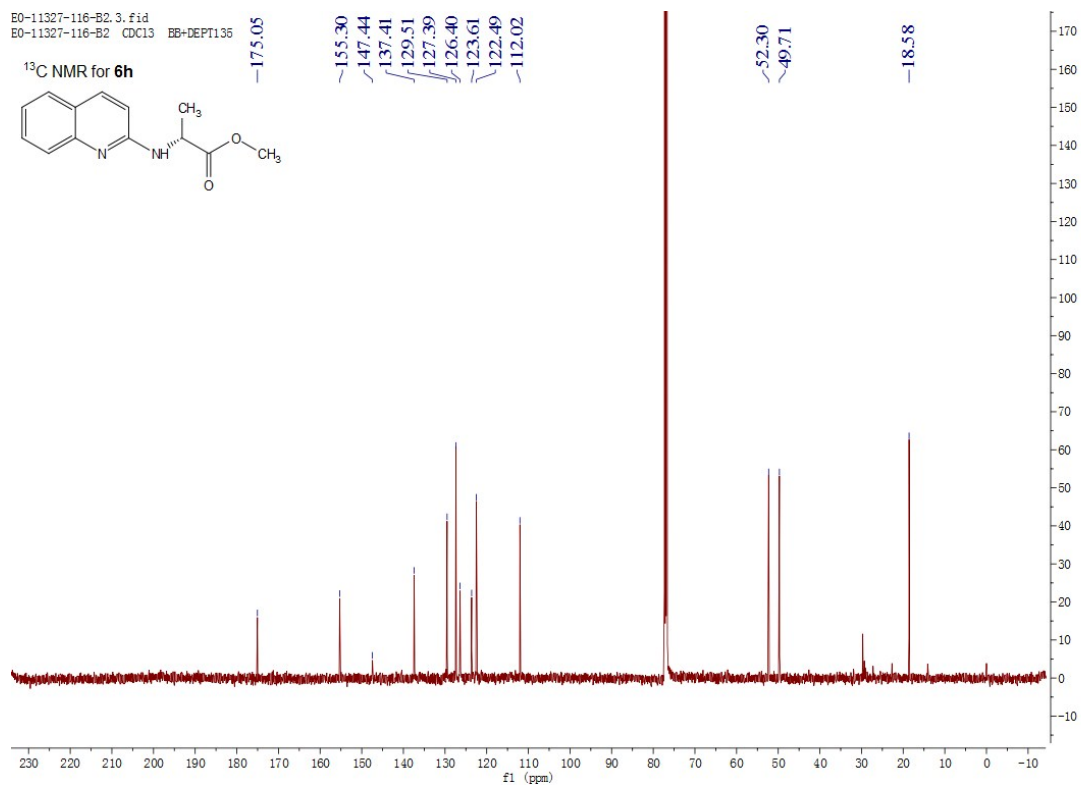

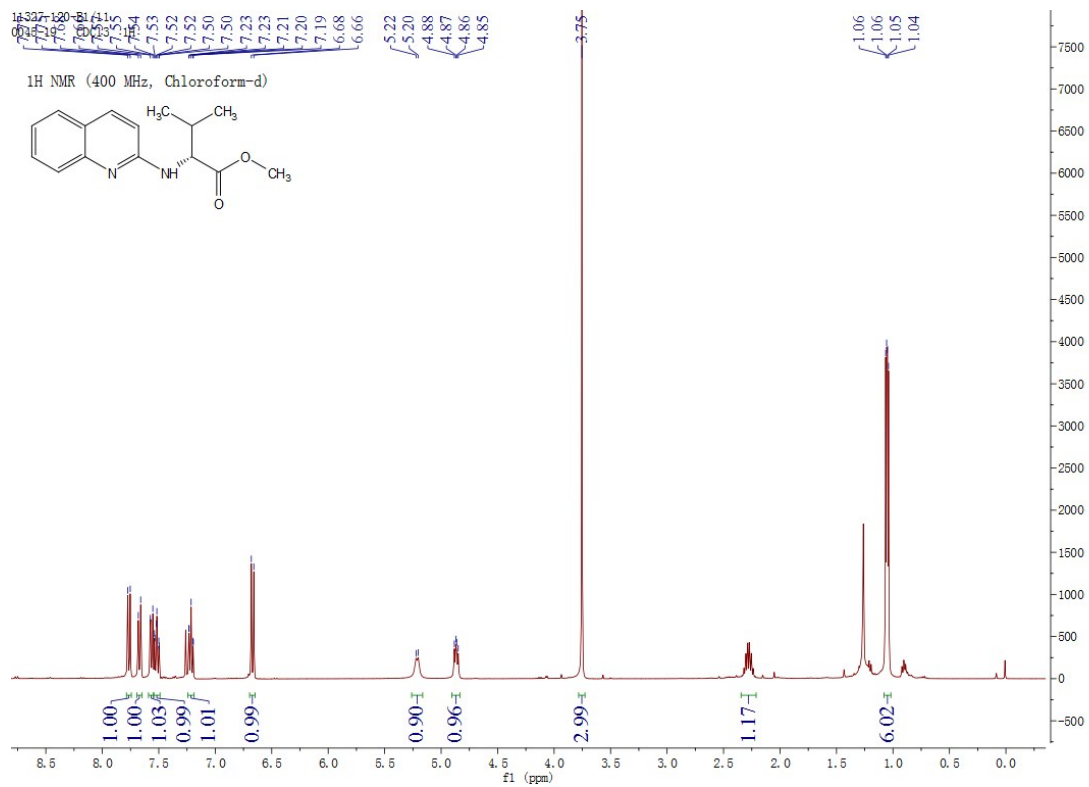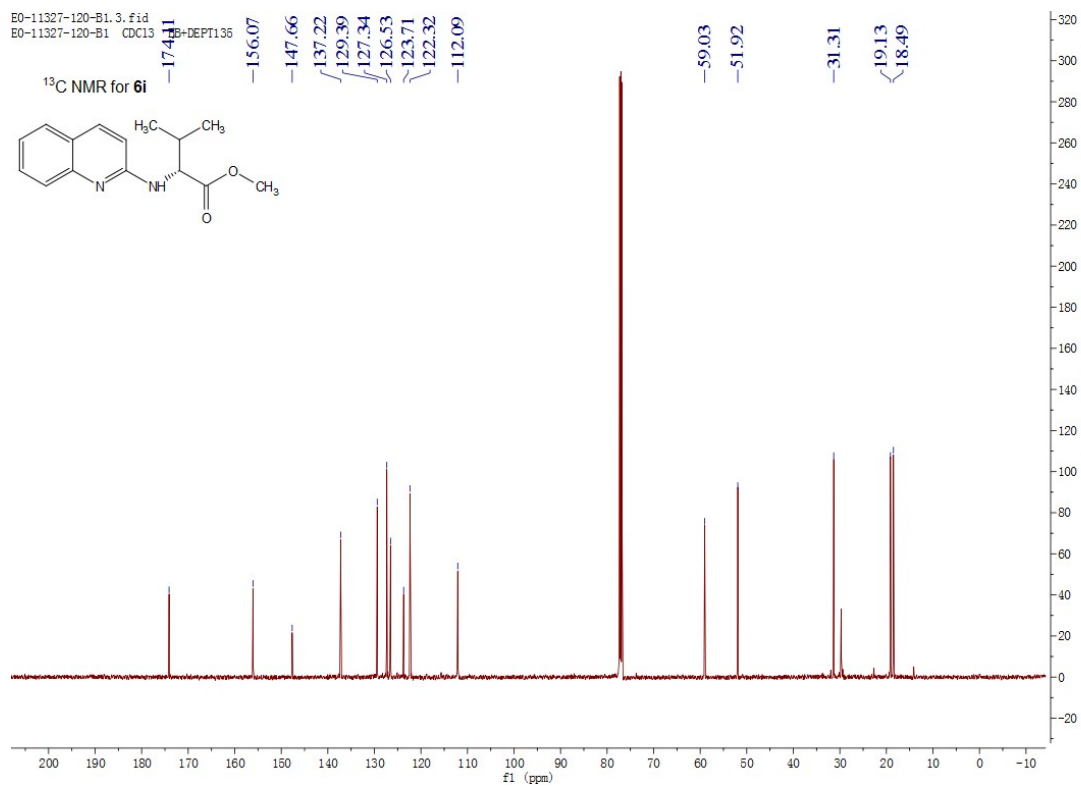

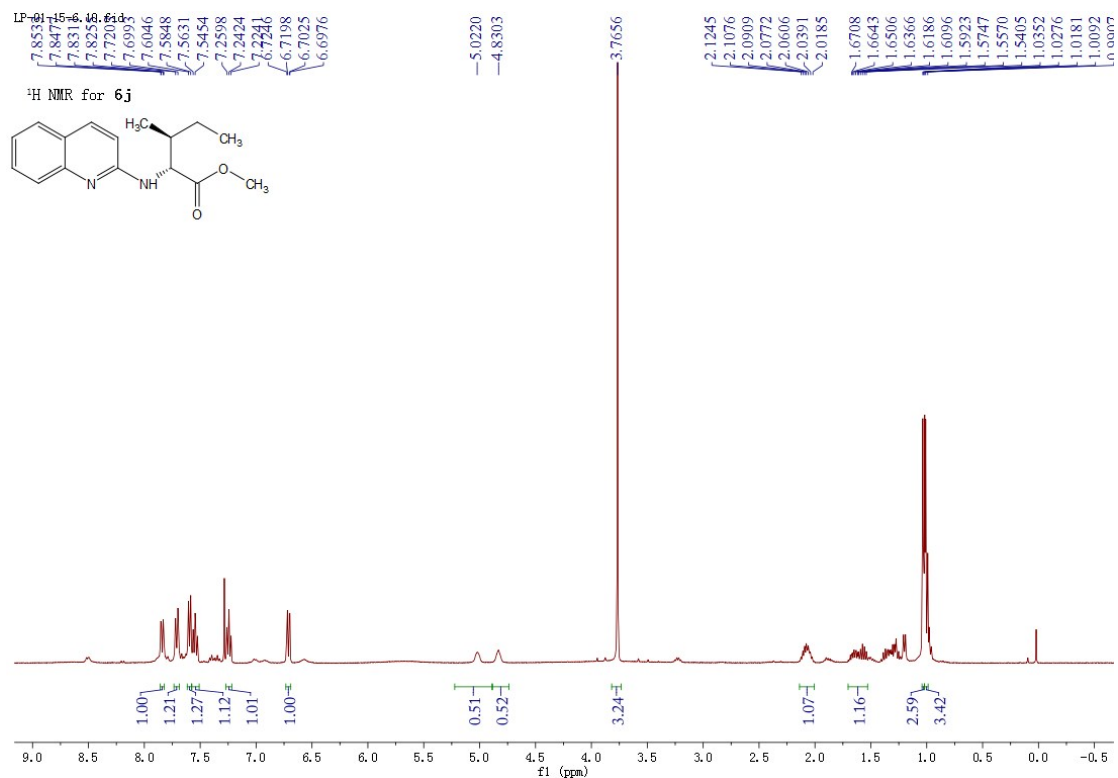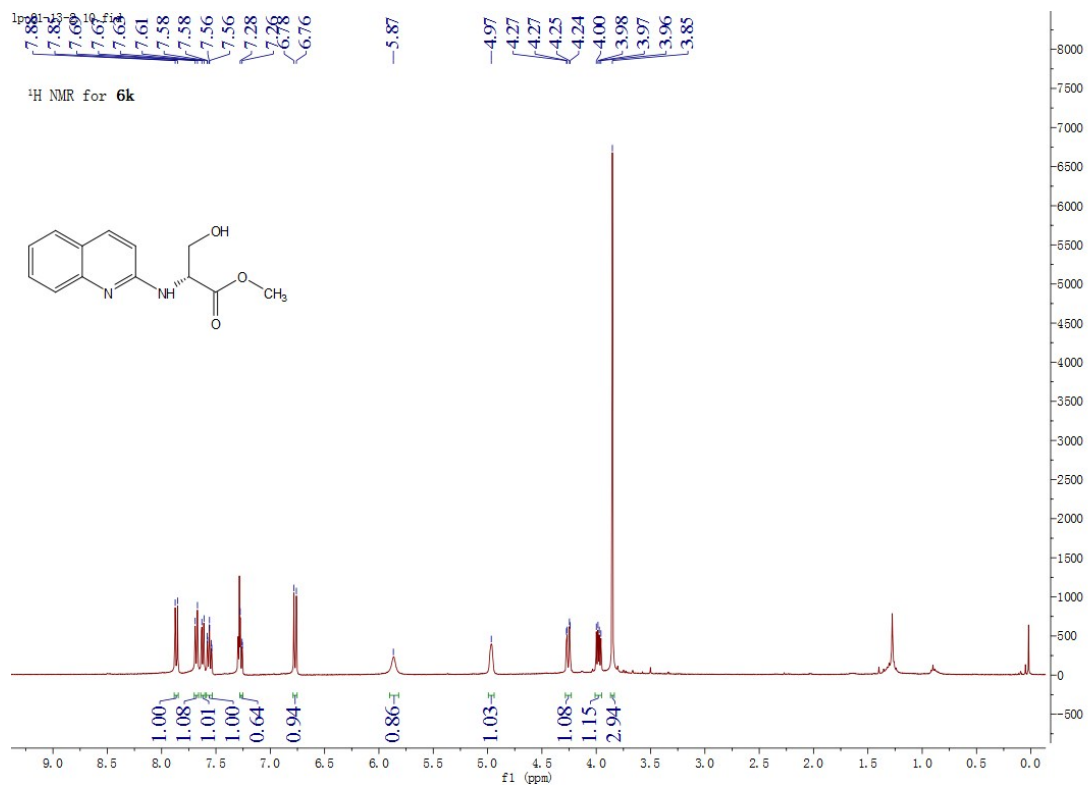

EO-LP-01-13-2\_43.fid  
EO-LP-01-13-2 CDCl3

<sup>13</sup>C NMR for **6k**

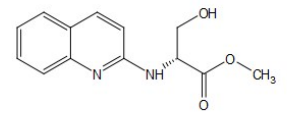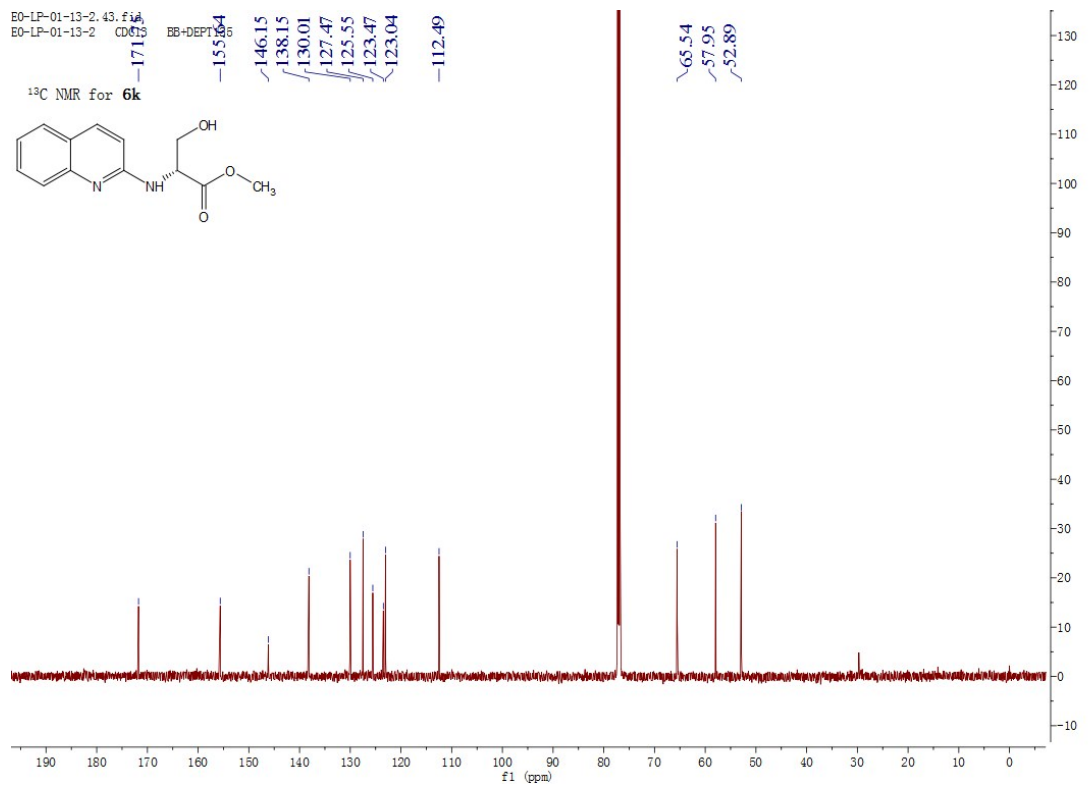

<sup>1</sup>H NMR for **6l**

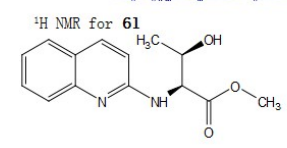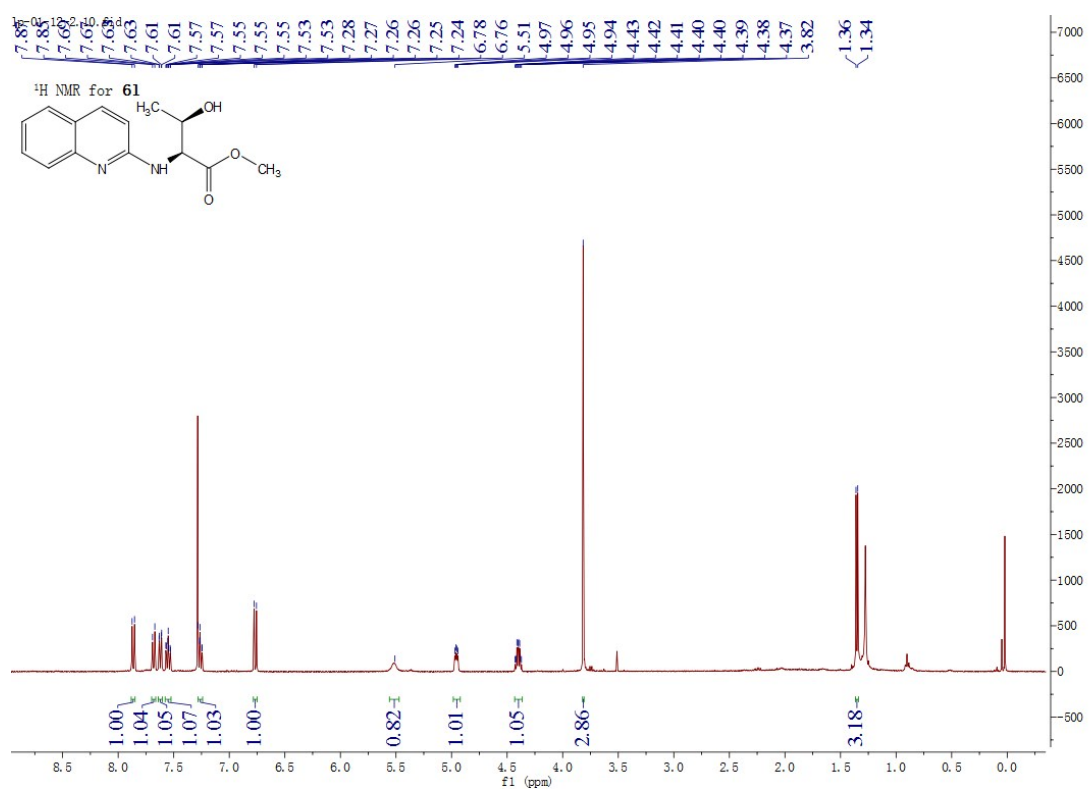

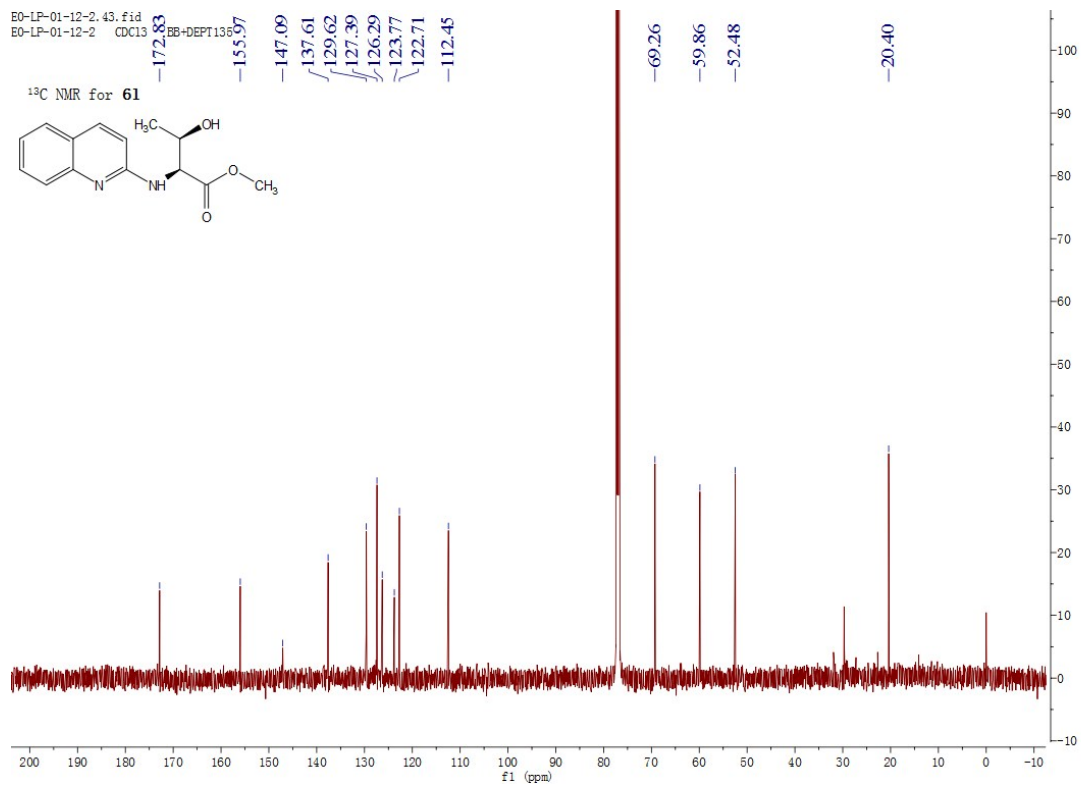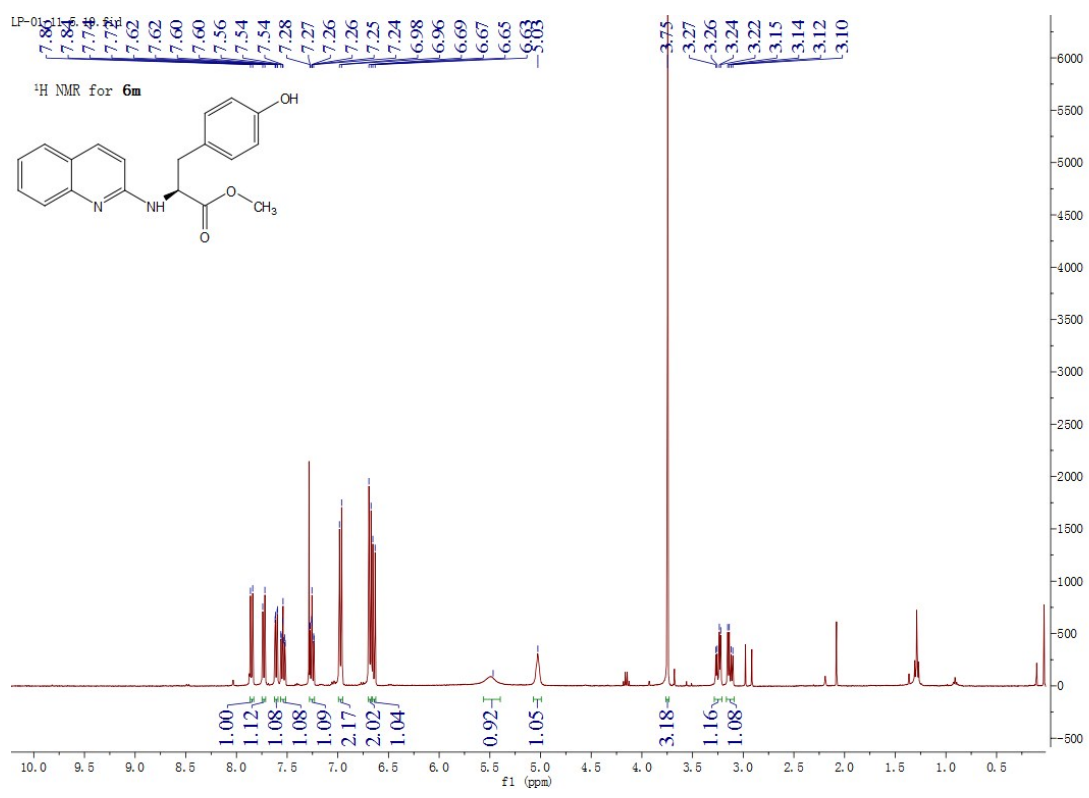

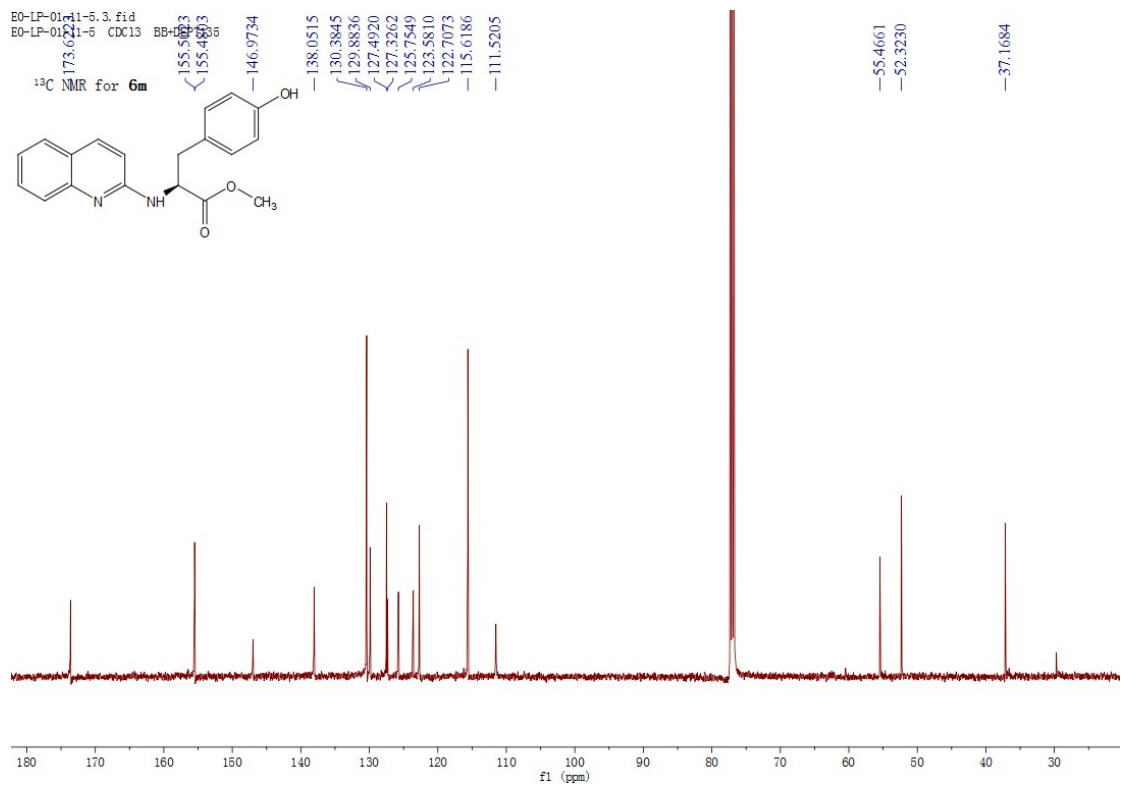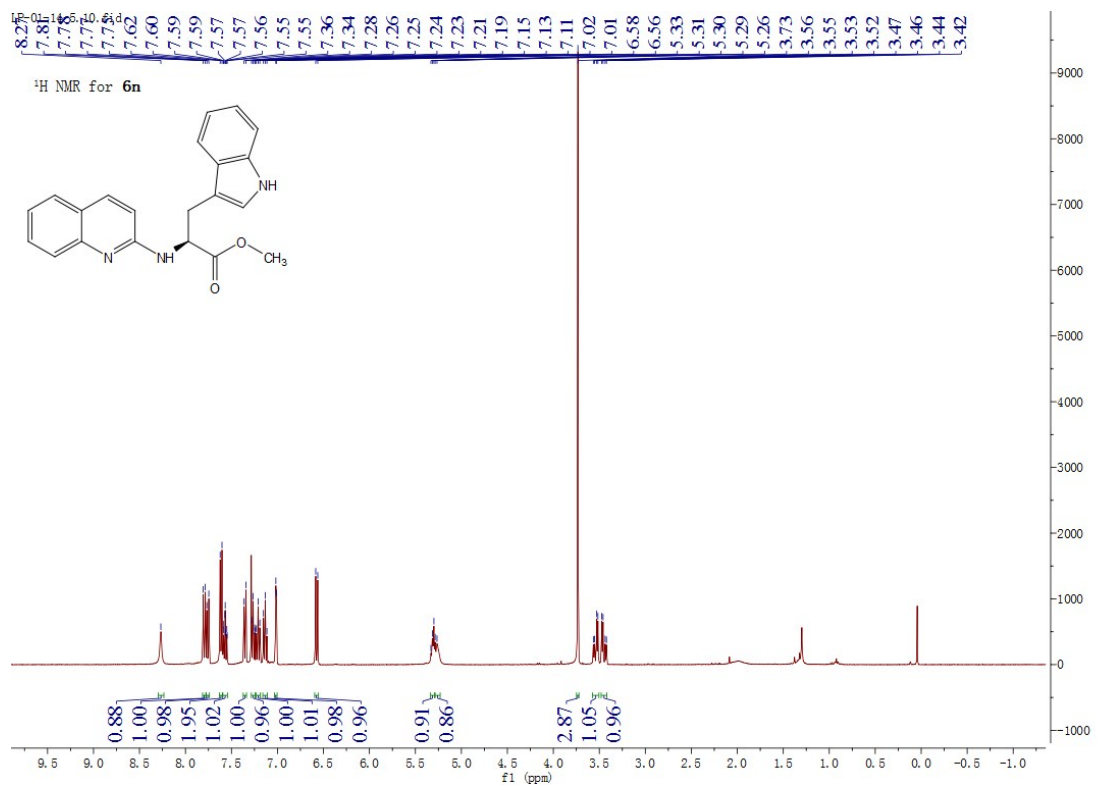

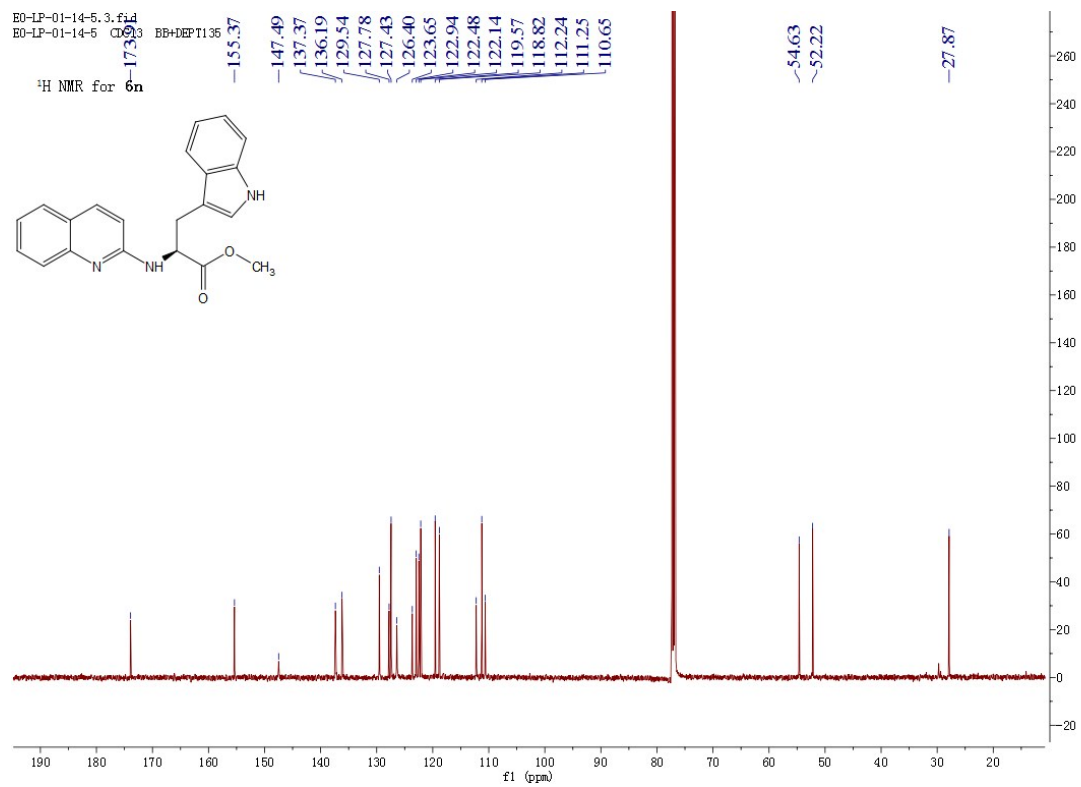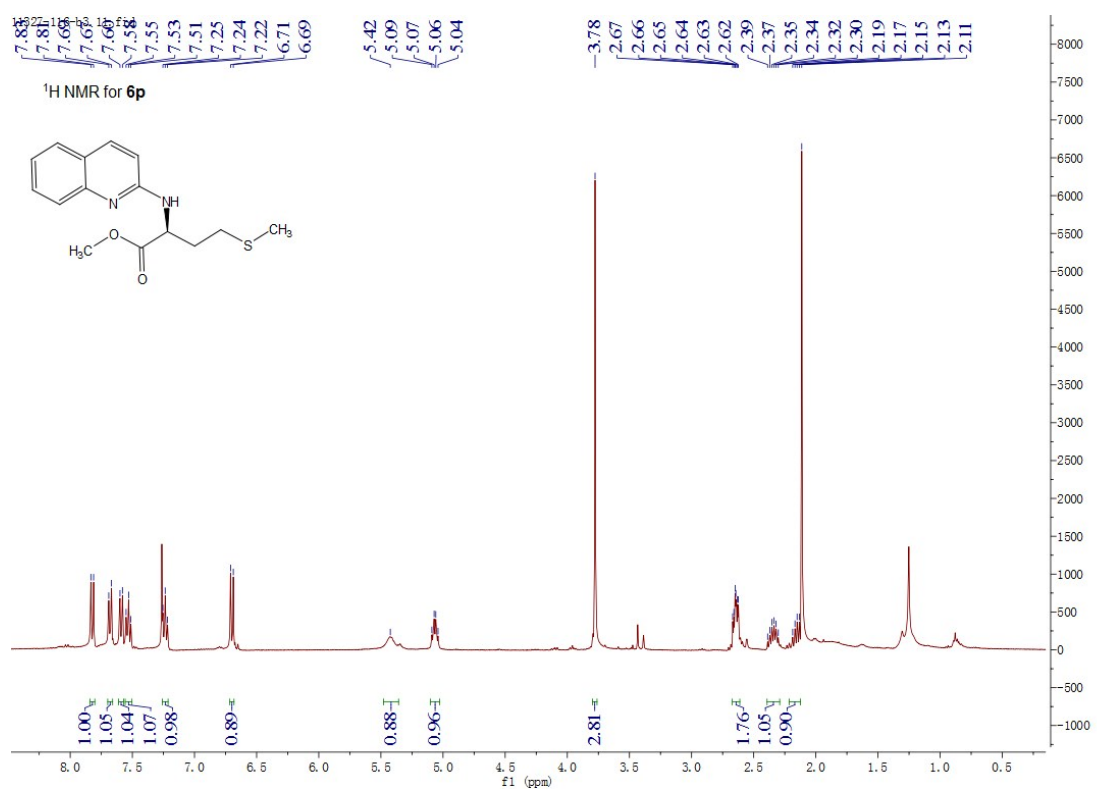



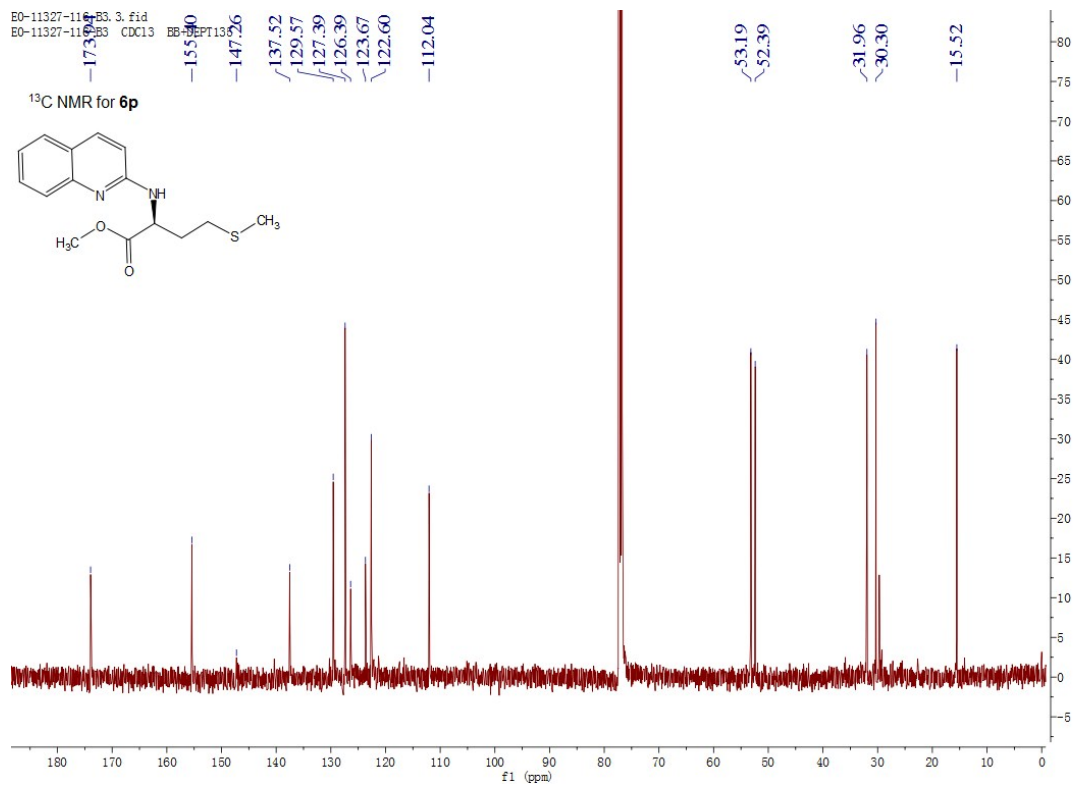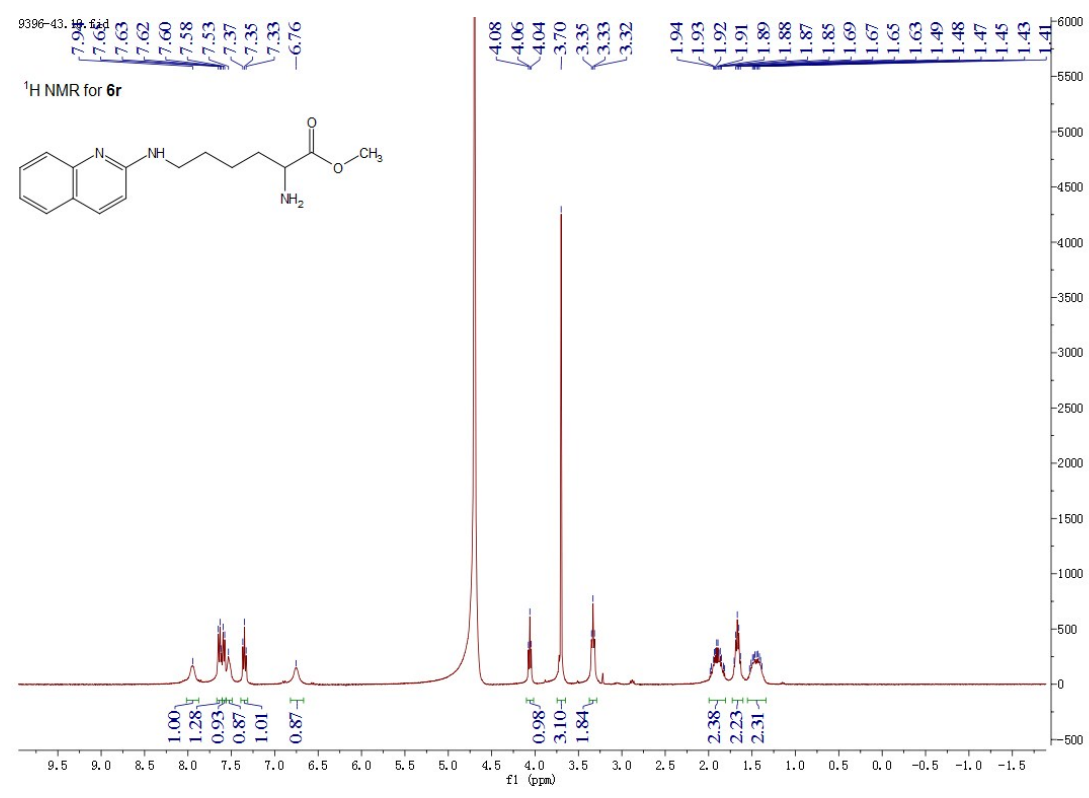

E0-9396-43.3.fid  
E0-9396-34.D20 BB+DEPT135

170.95  
152.53  
141.93  
135.57  
132.50  
128.68  
125.42  
121.07  
117.01  
113.78

53.56  
52.72  
41.62  
29.37  
26.88  
21.69

<sup>13</sup>C NMR for 6r

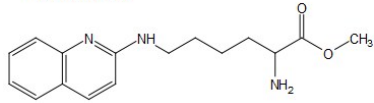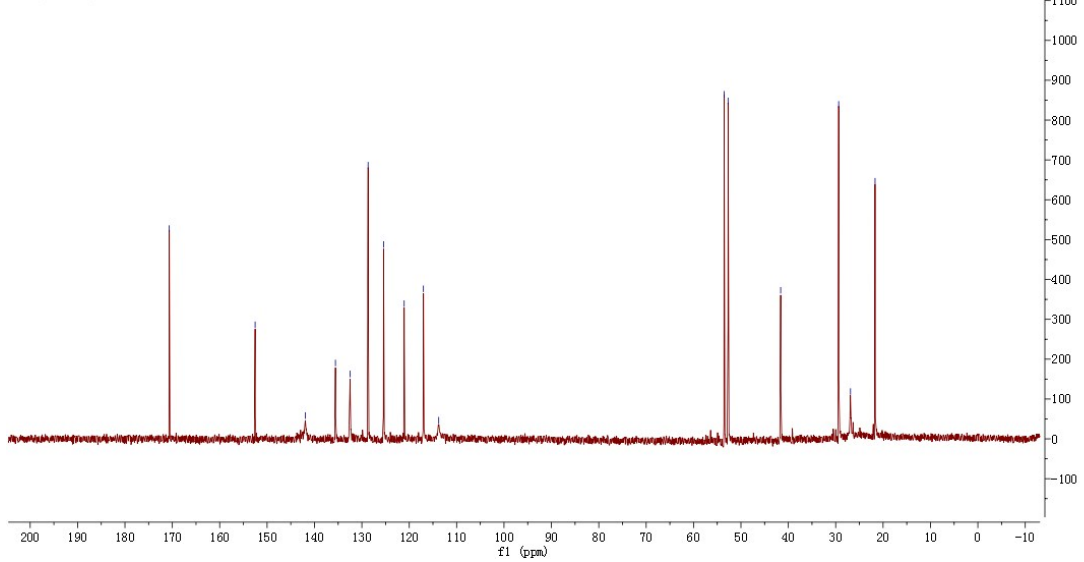

7.73, 7.72, 7.68, 7.66, 7.64, 7.53, 7.52, 7.51, 7.50, 7.50, 7.21, 7.19, 7.18, 6.64, 6.62, 3.54, 3.53, 3.51, 3.50, 3.39, 3.38, 3.37, 3.36, 2.81, 2.80, 1.71, 1.71, 1.70, 1.69, 1.69, 1.60, 1.60, 1.59, 1.59, 1.58, 1.57, 1.53, 1.51

<sup>1</sup>H NMR for 6s

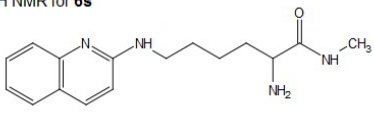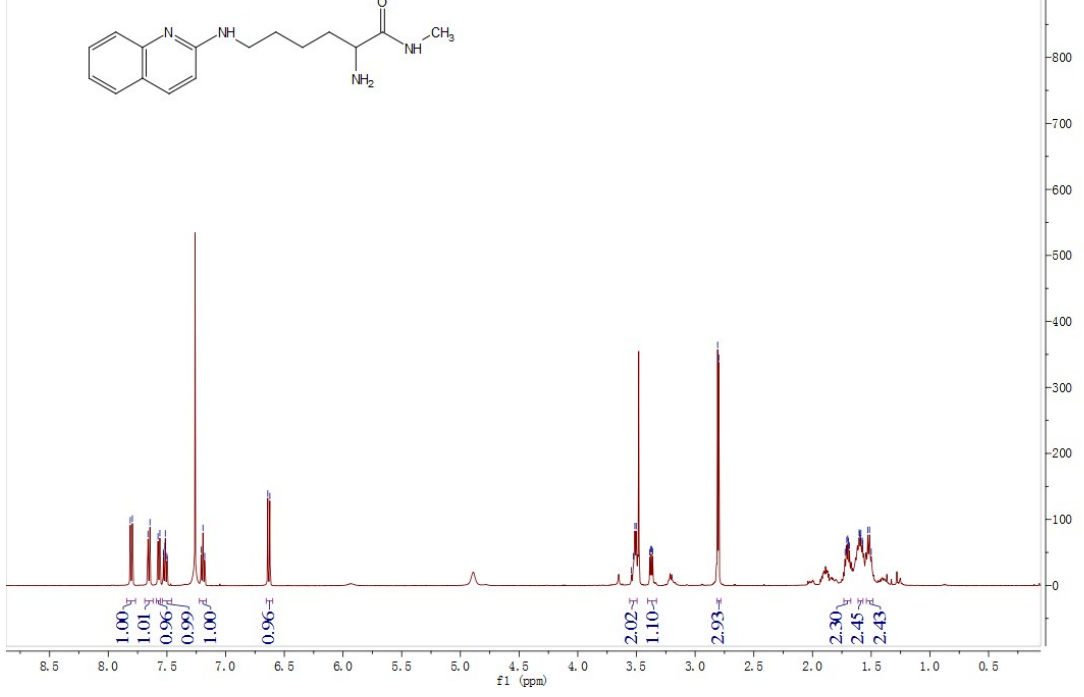

EO-7372-120/33  
EO-7372-120 CDCl<sub>3</sub>

BB+DEPT135

<sup>13</sup>C NMR for 6s

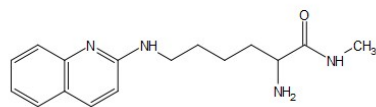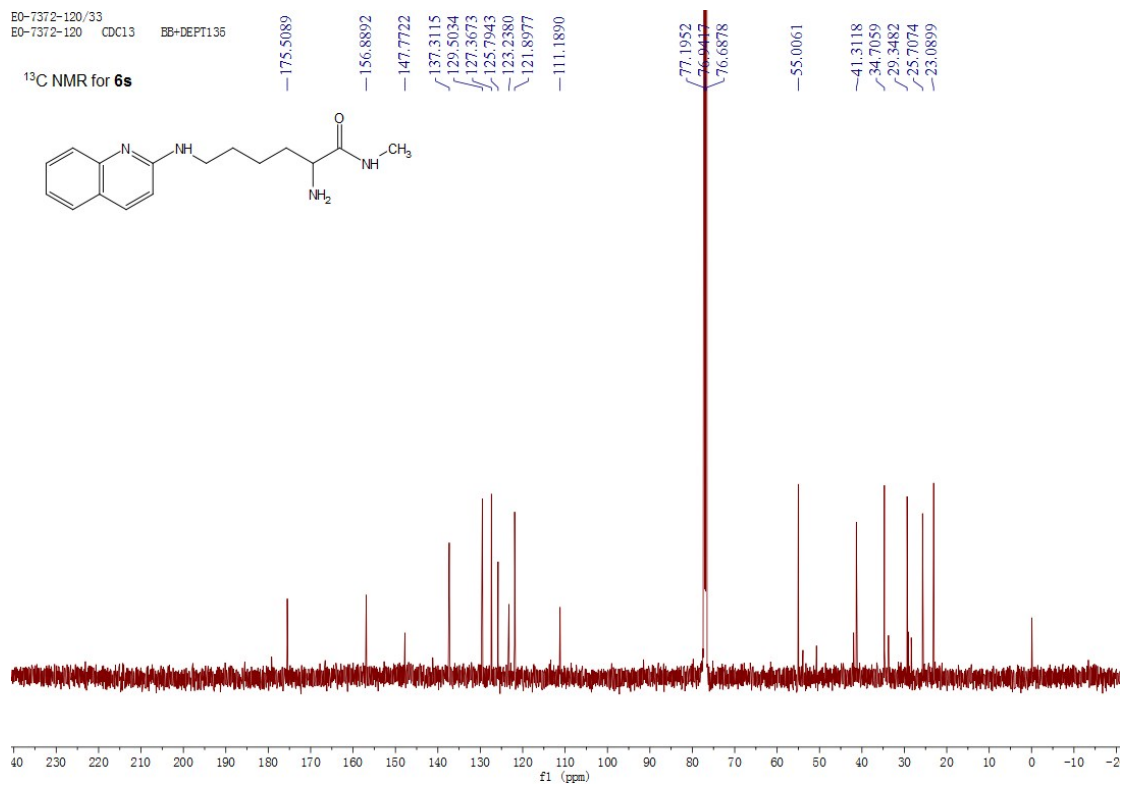

11327-51

<sup>1</sup>H NMR for 6A

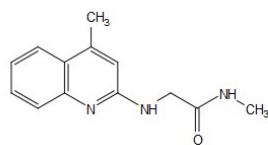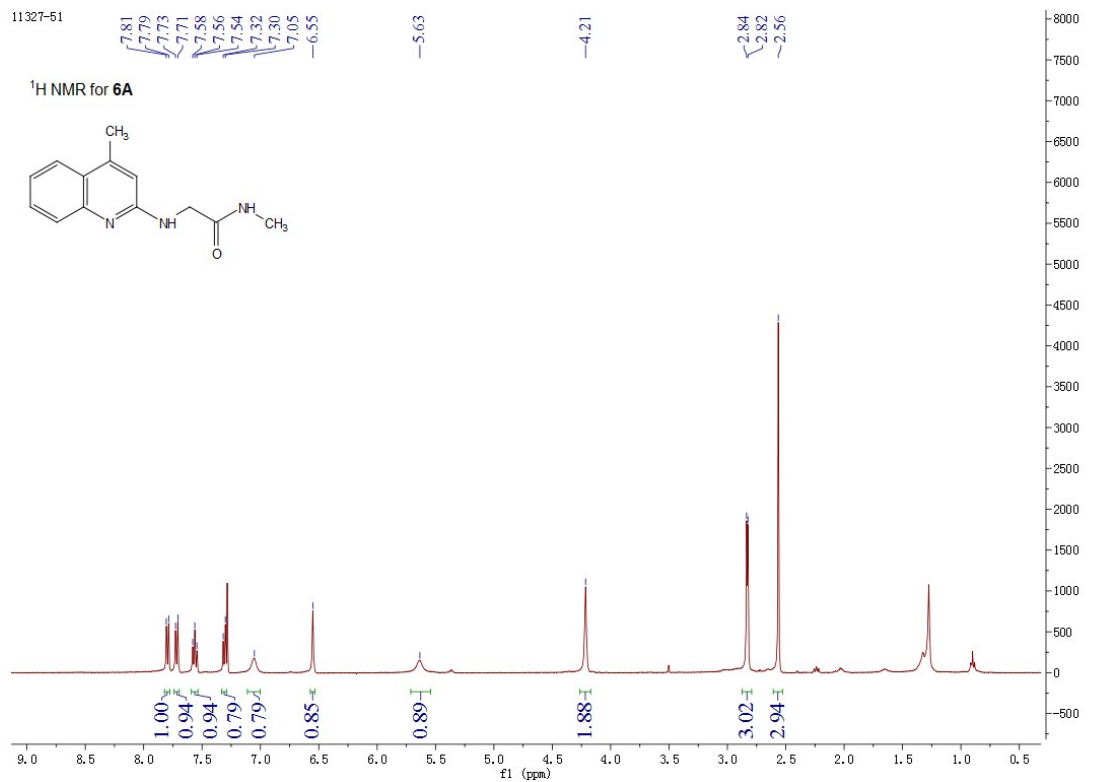

EO-11327-51-20180319\_3.fid  
 EO-11327-51-20180319.DM3

<sup>13</sup>C NMR for 6A

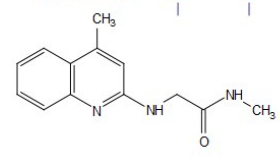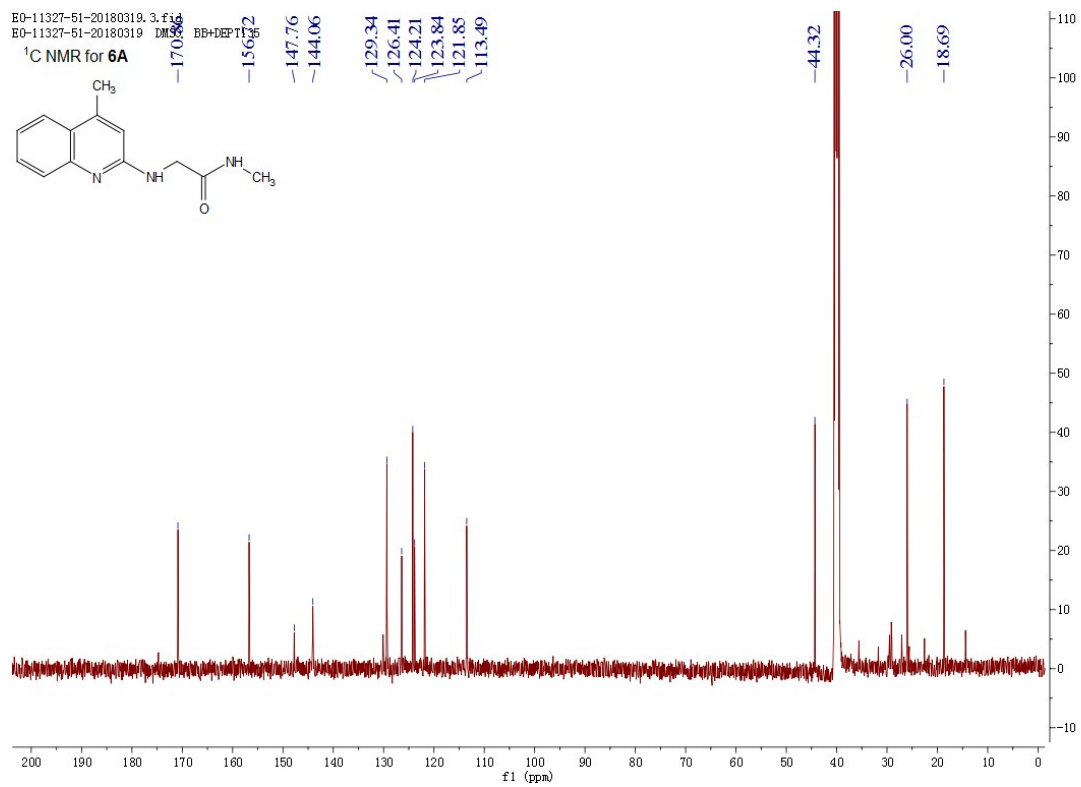

<sup>1</sup>H NMR for 6B

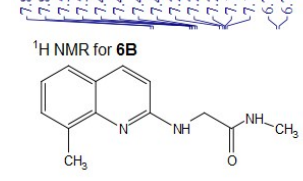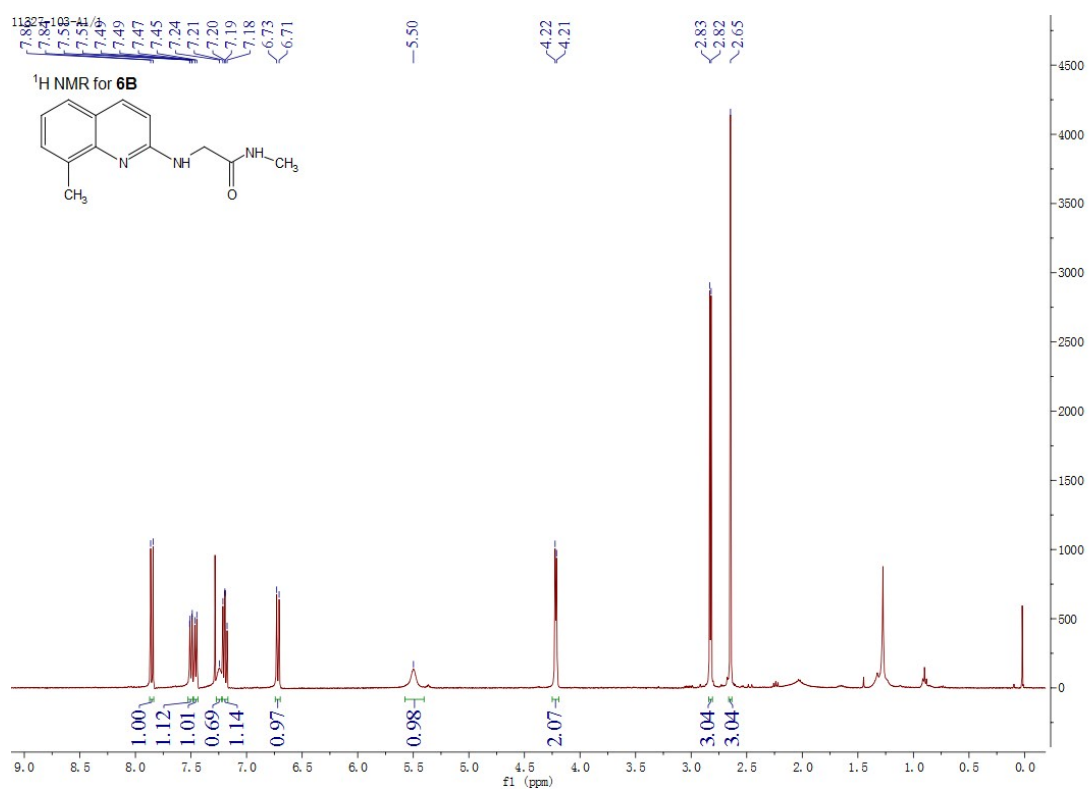

EO-11327-103-A1.3.fid  
EO-11327-103-A1 CDCl3 BB=DEPT135

<sup>13</sup>C NMR for 6B

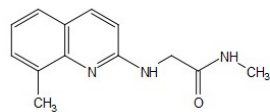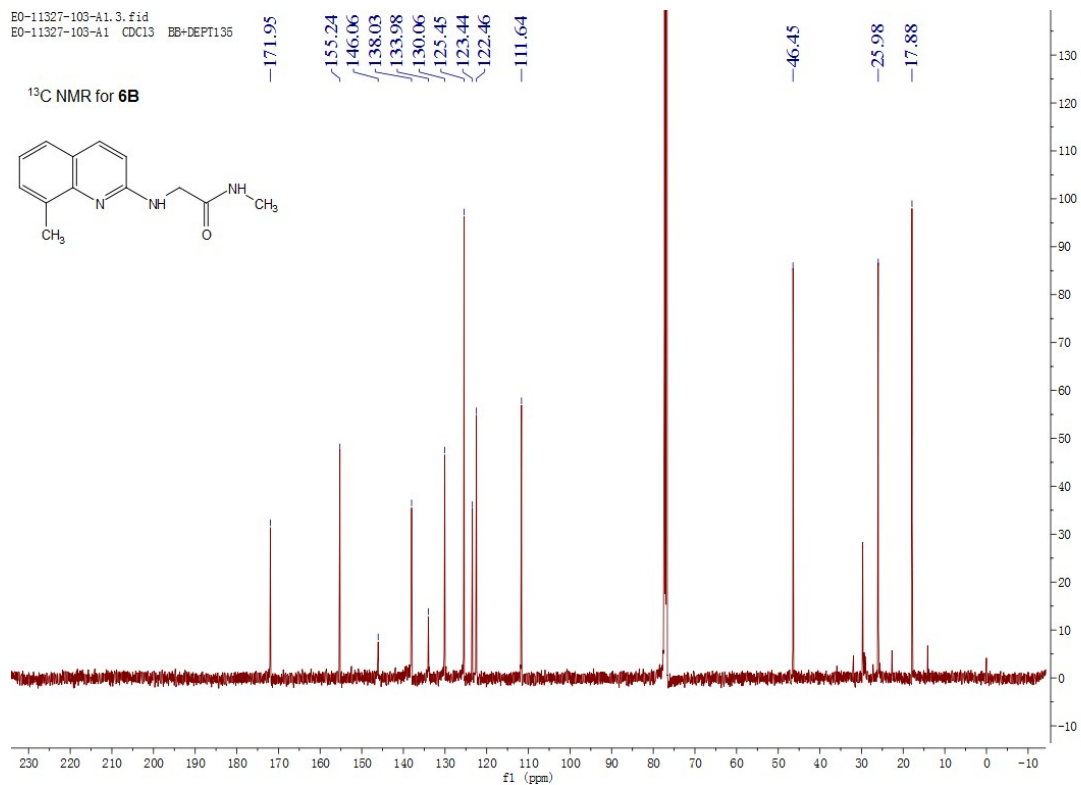

11327-103-A2/1

<sup>1</sup>H NMR for 6C

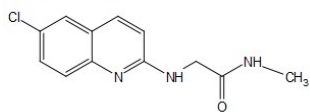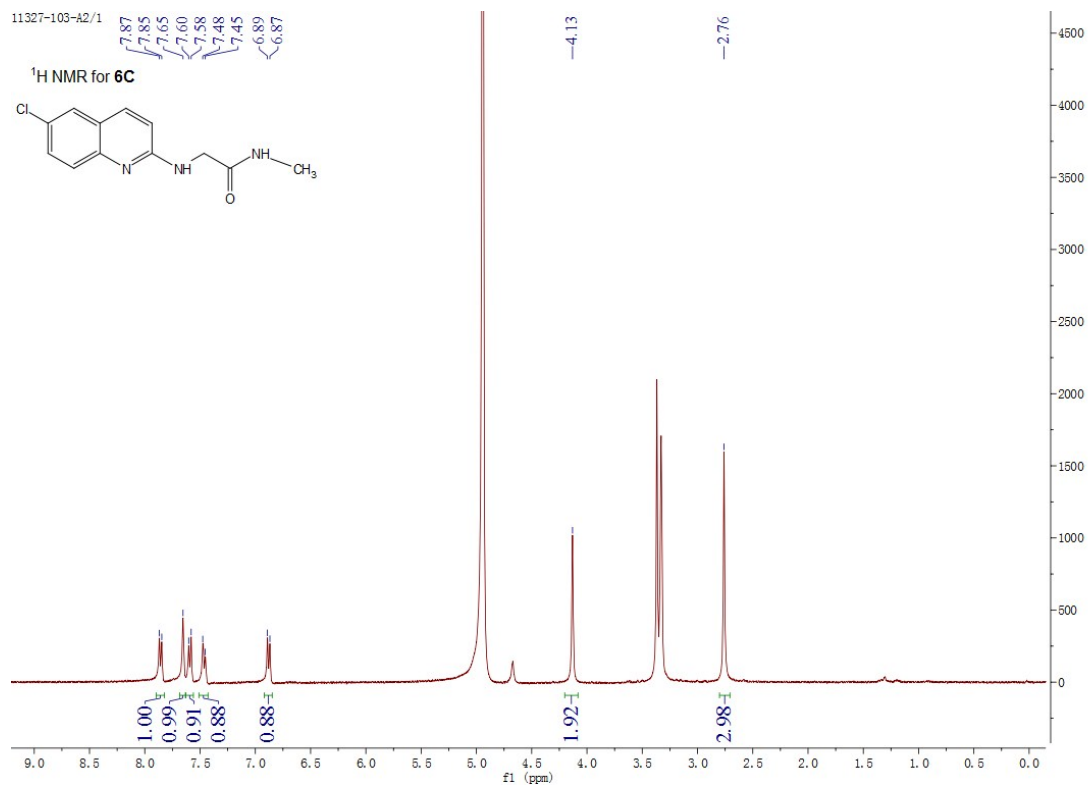

EO-11327-103-A2-4\_3.fid  
EO-11327-103-A2-4 DMSO EB-DEPT135

<sup>13</sup>C NMR for 6C

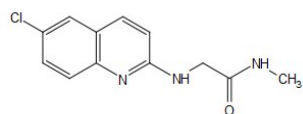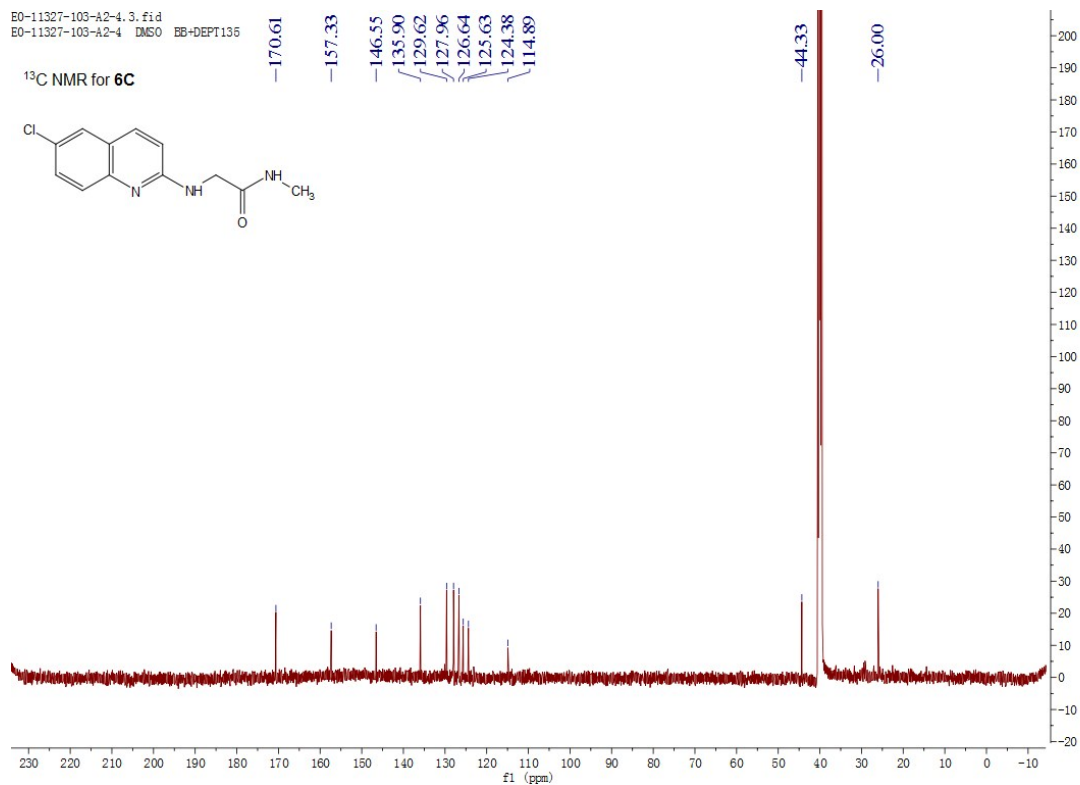

11327-83.1.fid

<sup>1</sup>H NMR for 6D

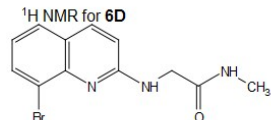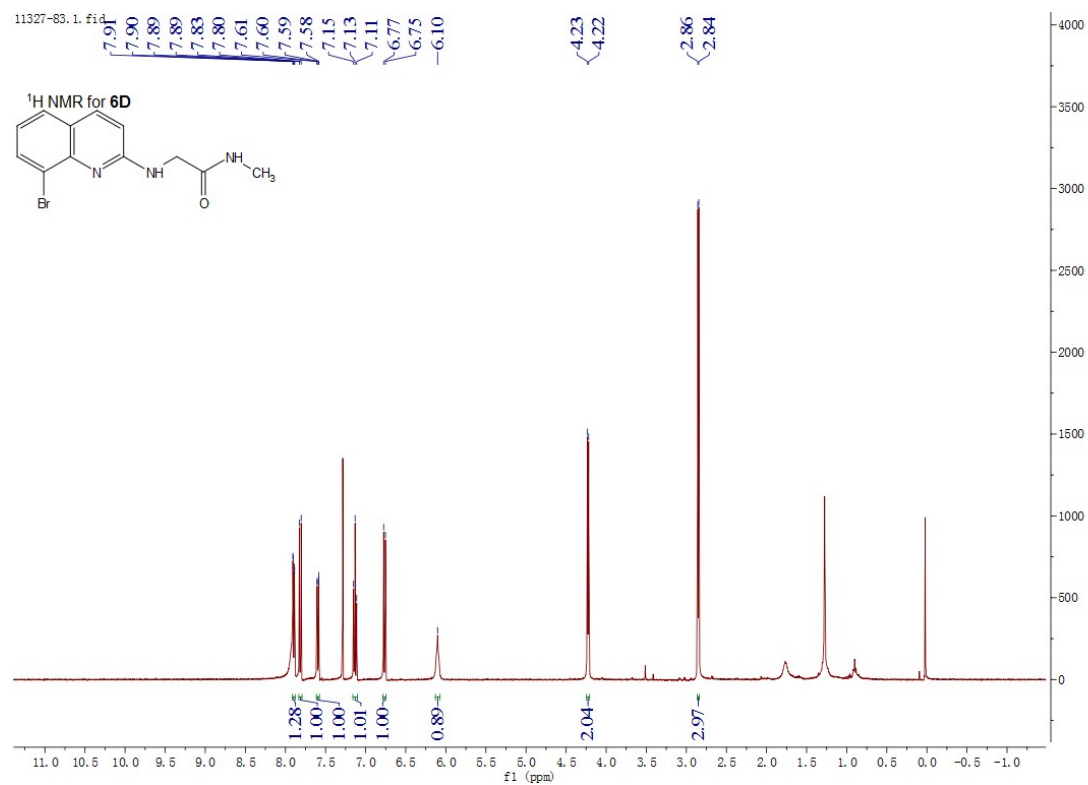

EO-11327-83, 3. fid  
EO-11327-83 CDC13

<sup>13</sup>C NMR for 6D

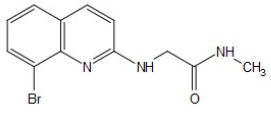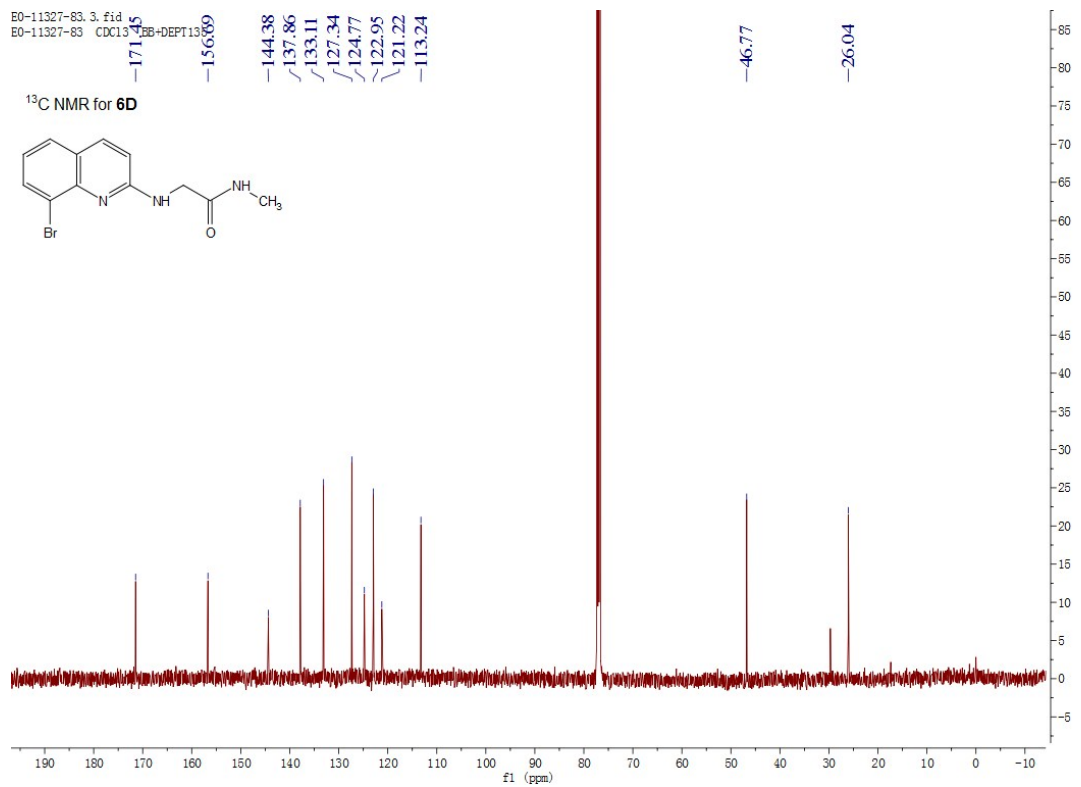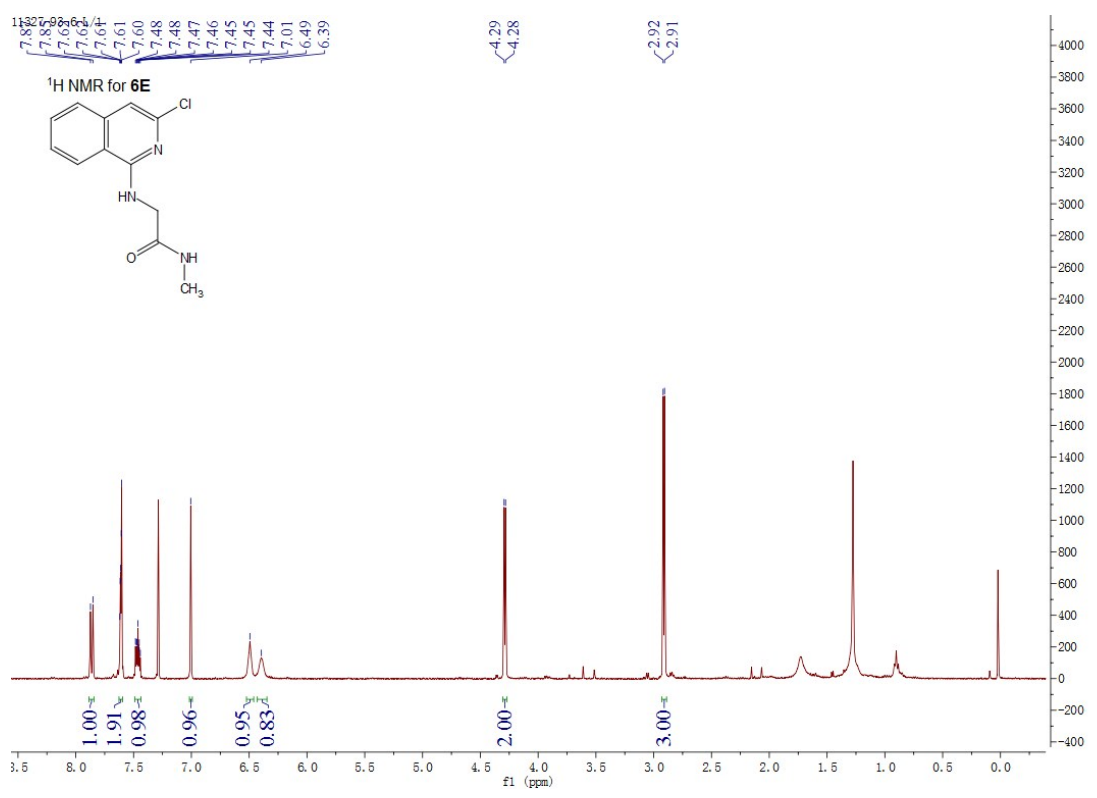

EO-11327-93-6-L-3-6-13  
EO-11327-93-6-L-3-6-13

EB-DEPT

<sup>1</sup>H NMR for 6E

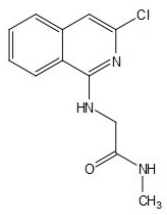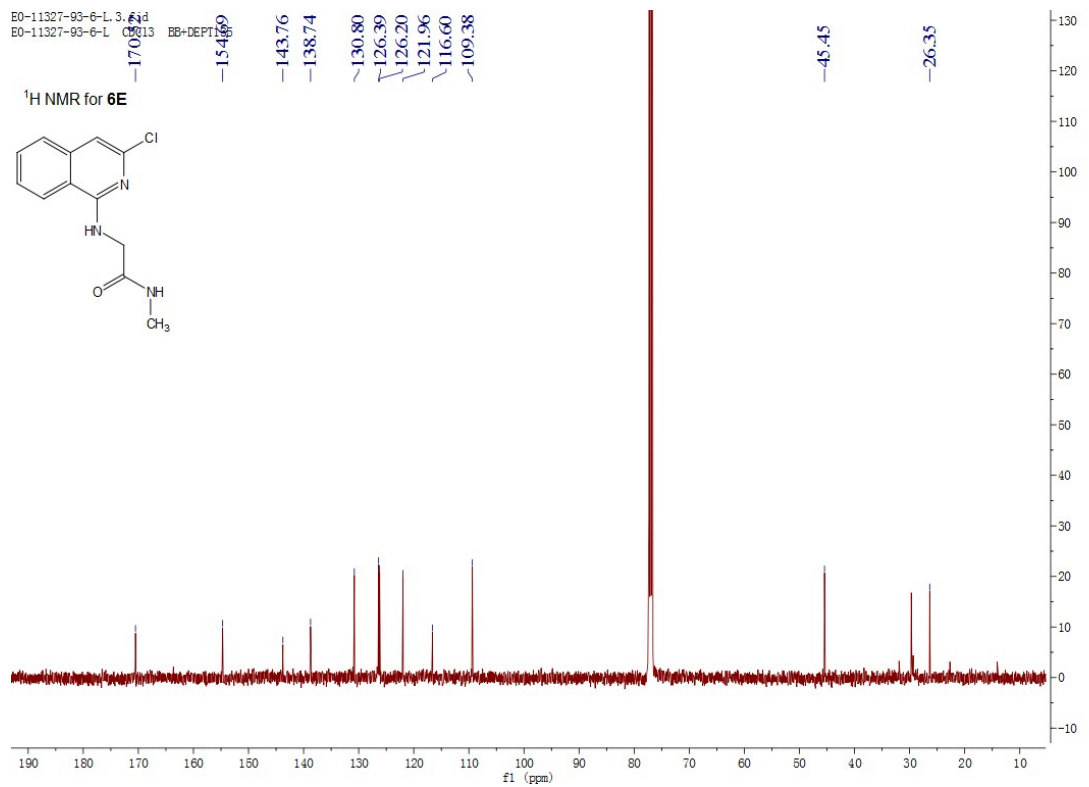

11327-93-6-L-3-6-13

<sup>1</sup>H NMR for 6F

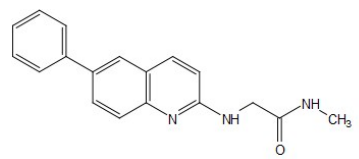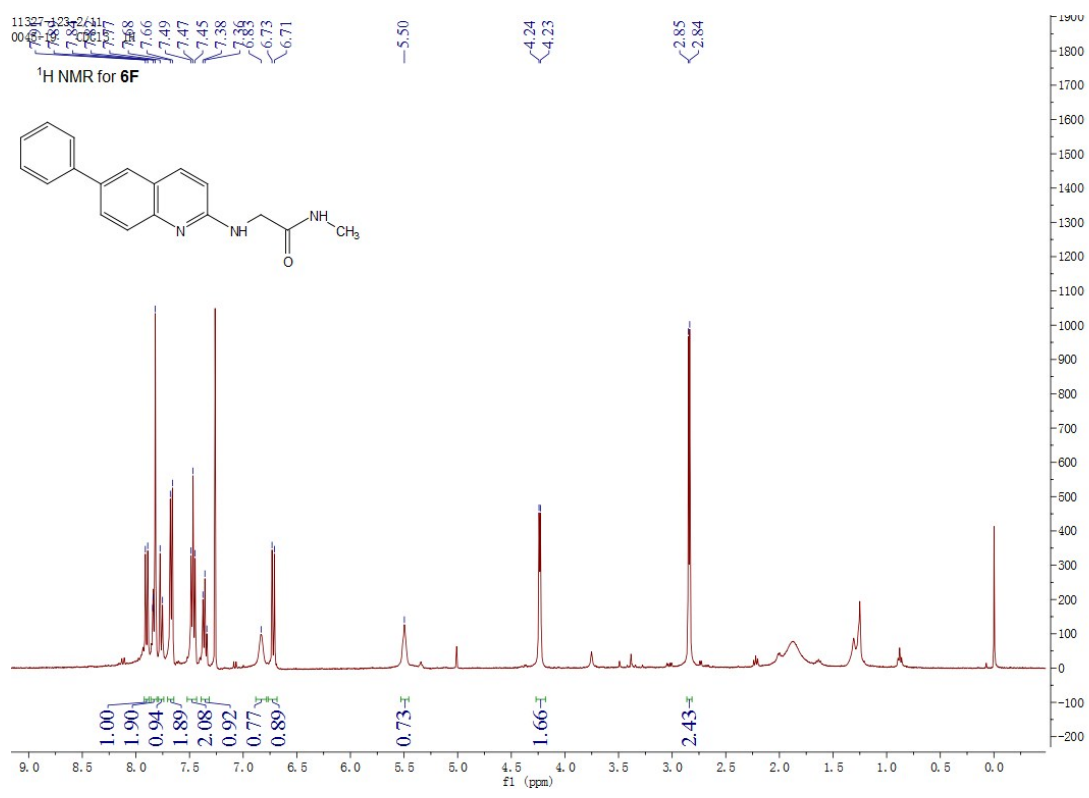



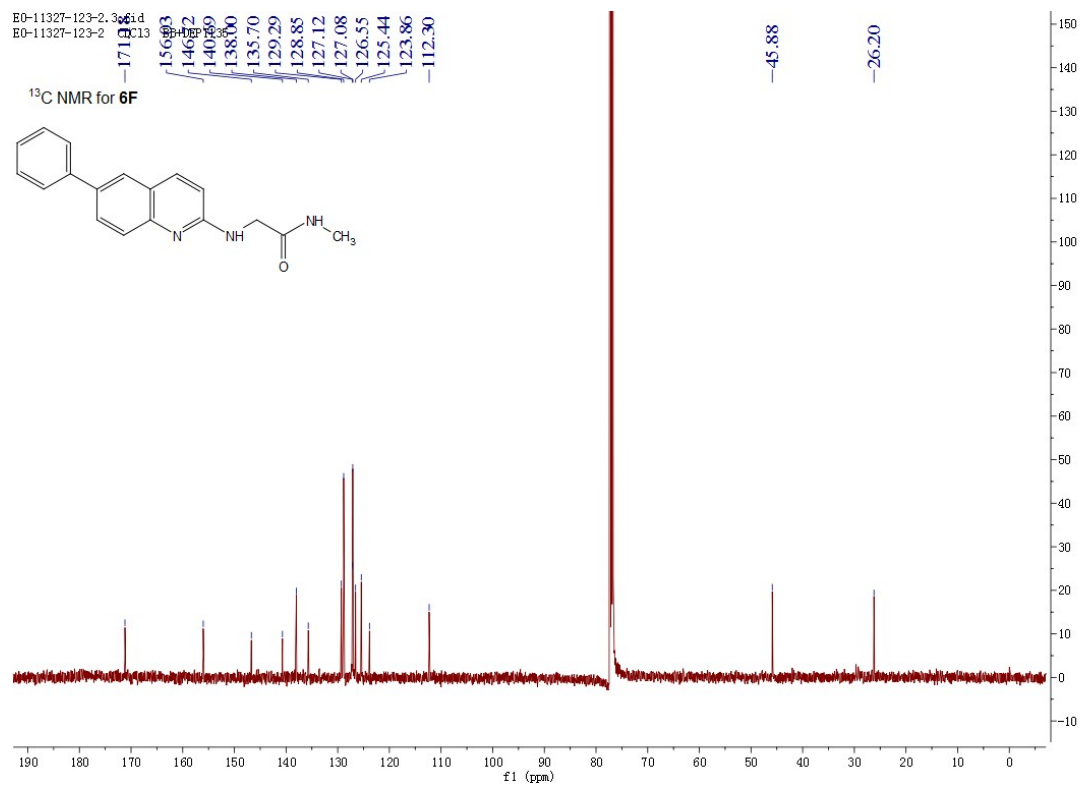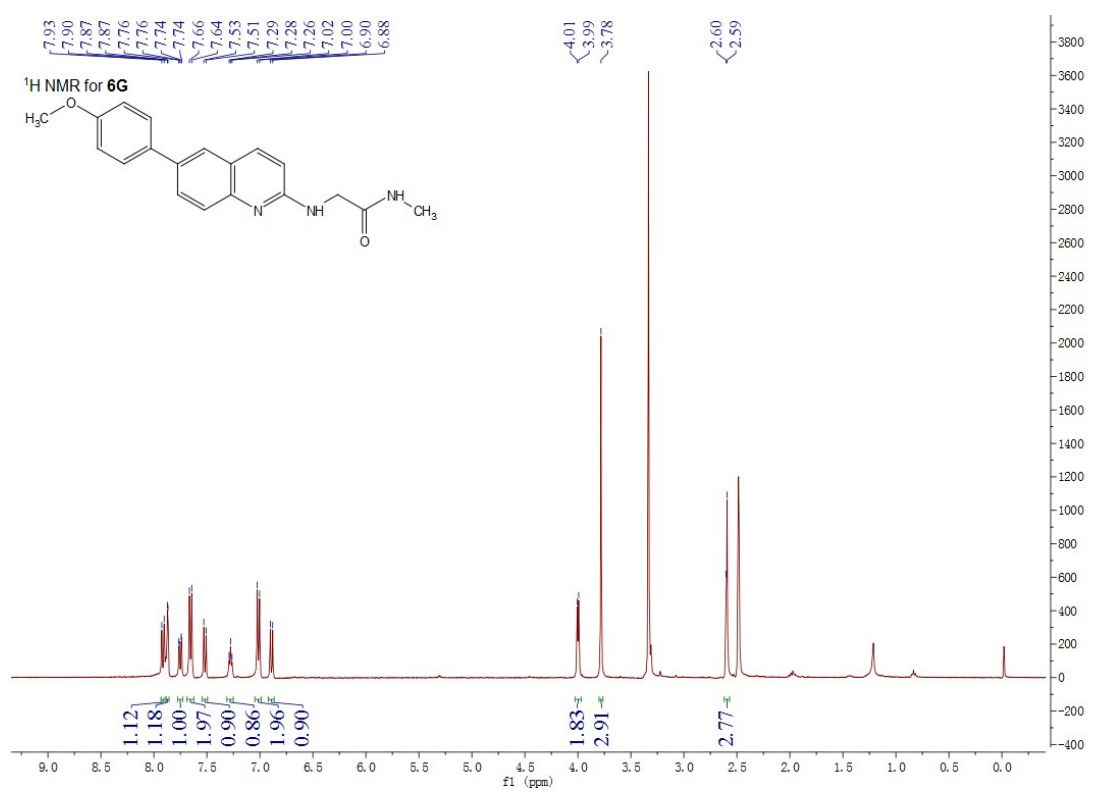

EO-11327-125.3.fid  
EO-11327-125 DMSO BB+DEPT135

<sup>13</sup>C NMR for 6G

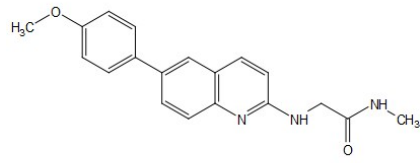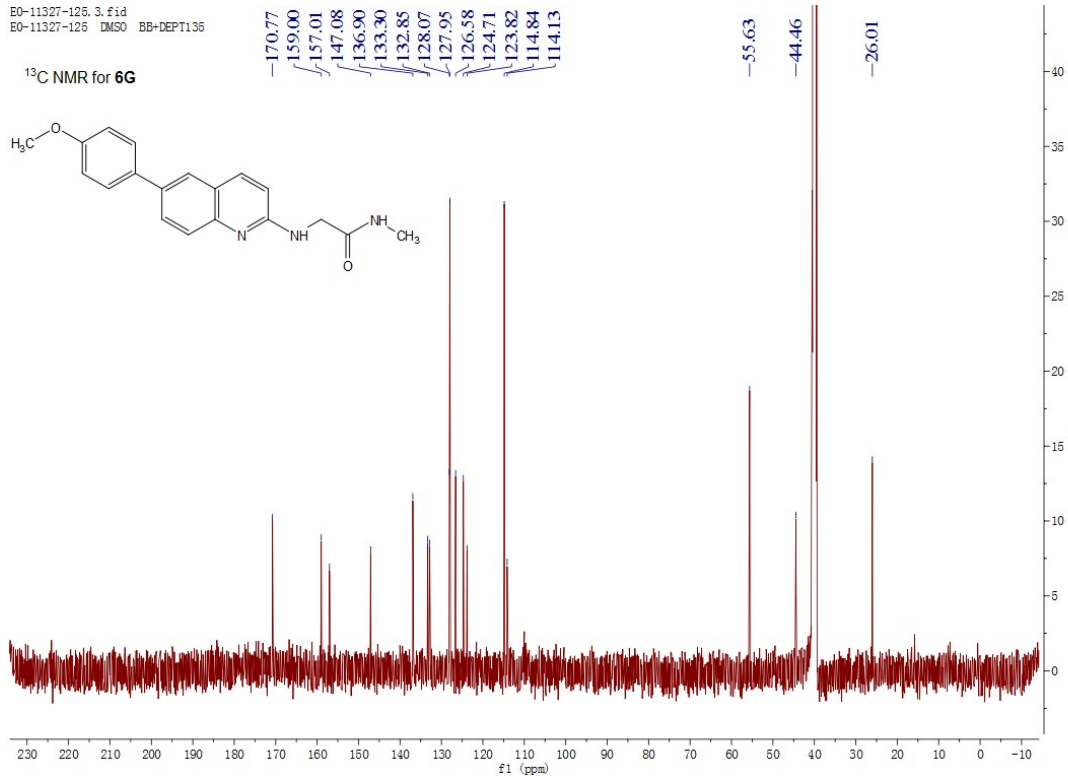

11325 107.41  
0045 107.41  
7.95  
7.95  
7.88  
7.85  
7.81  
7.79  
7.59  
6.94  
6.92

<sup>1</sup>H NMR for 6H

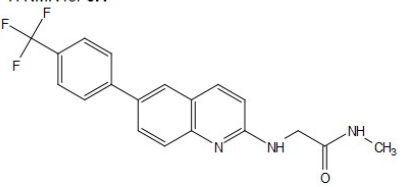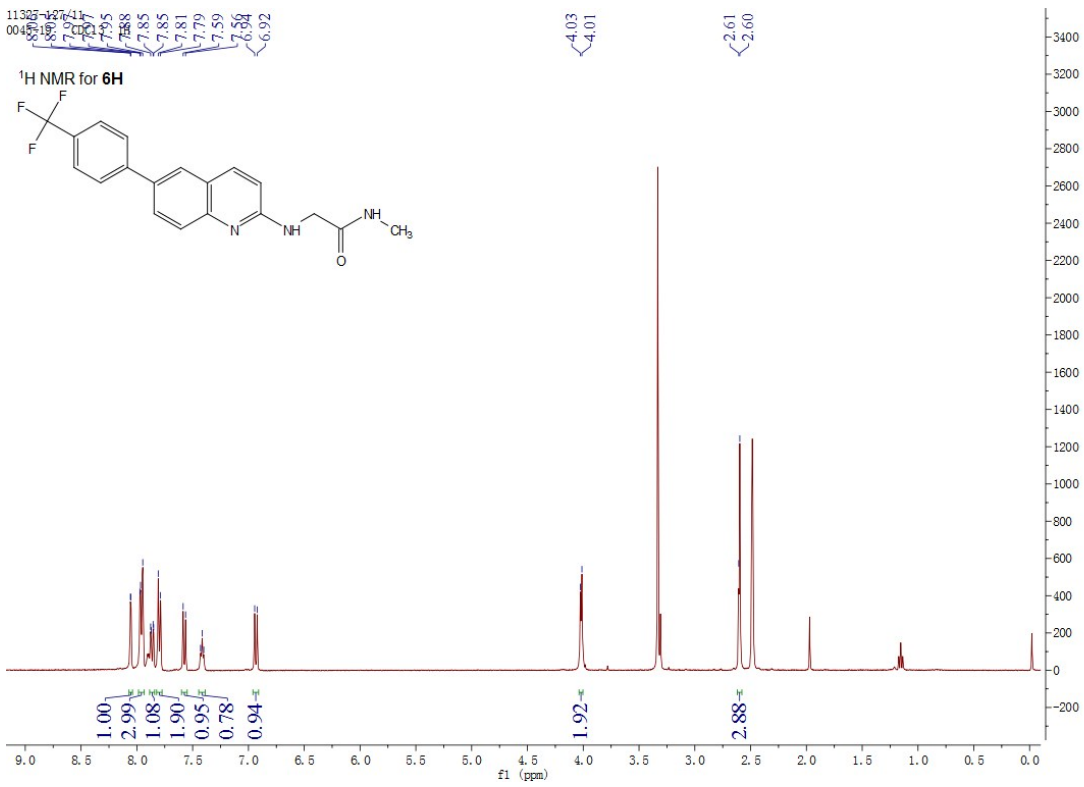

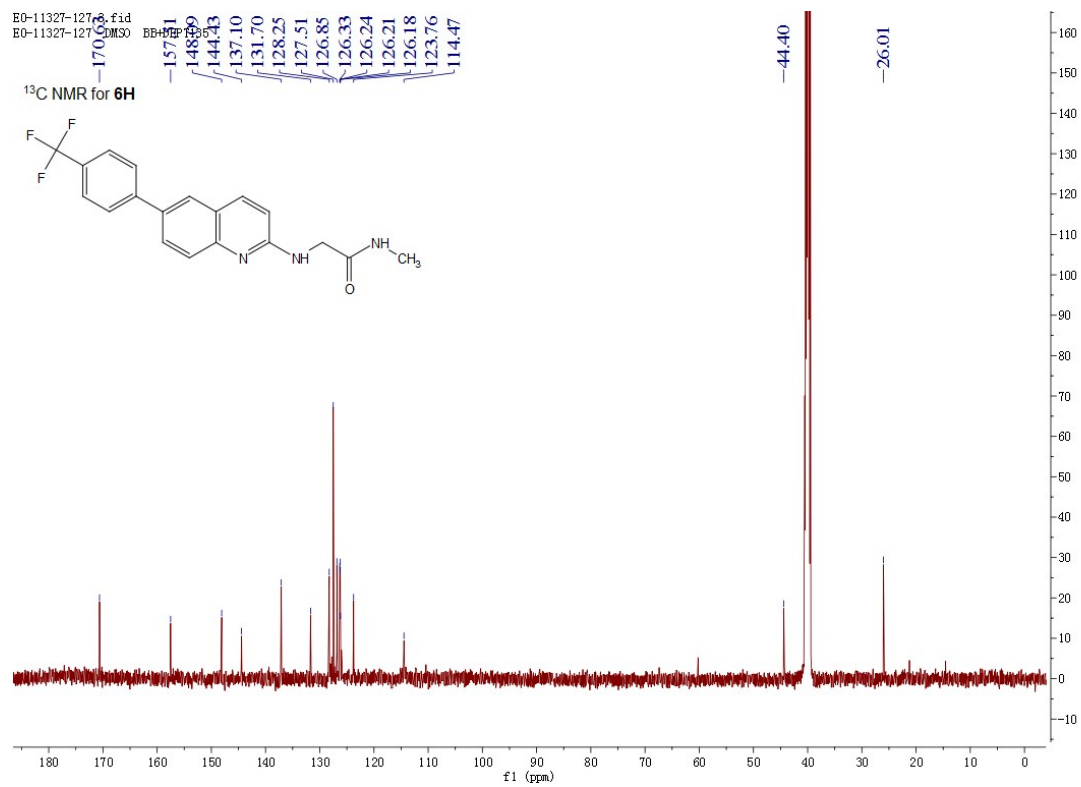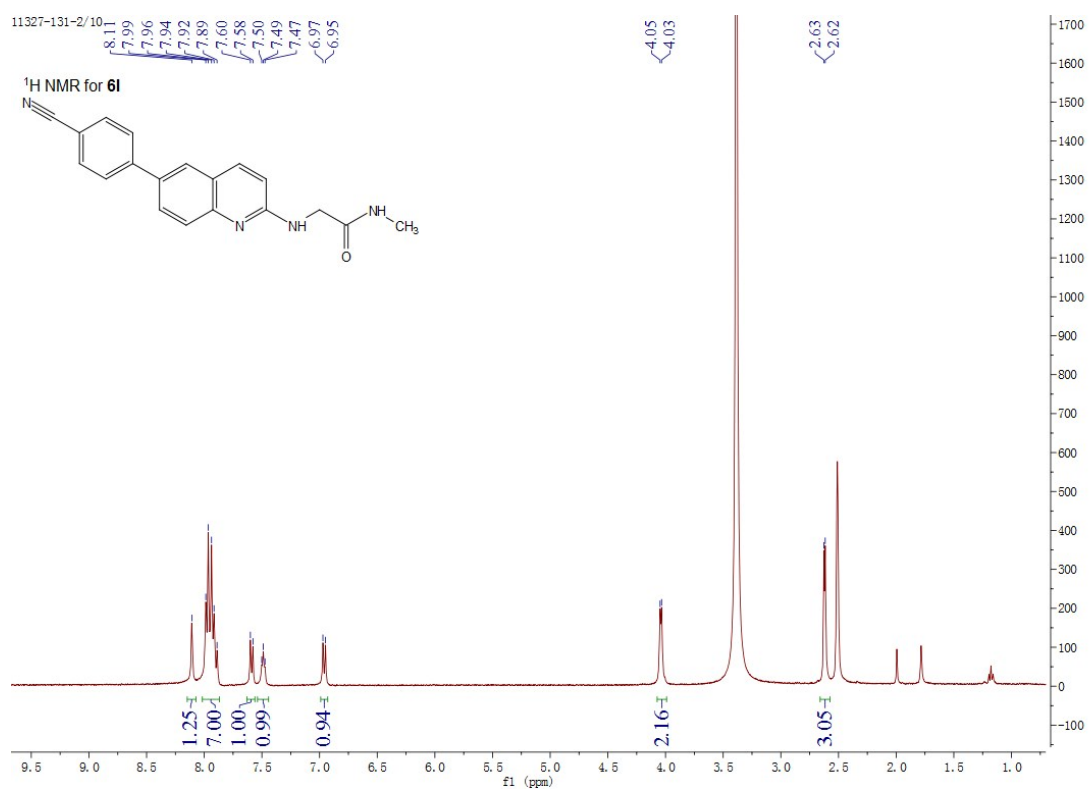

E0-11327-131-2\_3.fid  
E0-11327-131-2 DMSO BB+DEPT135  
<sup>13</sup>C NMR for 6I

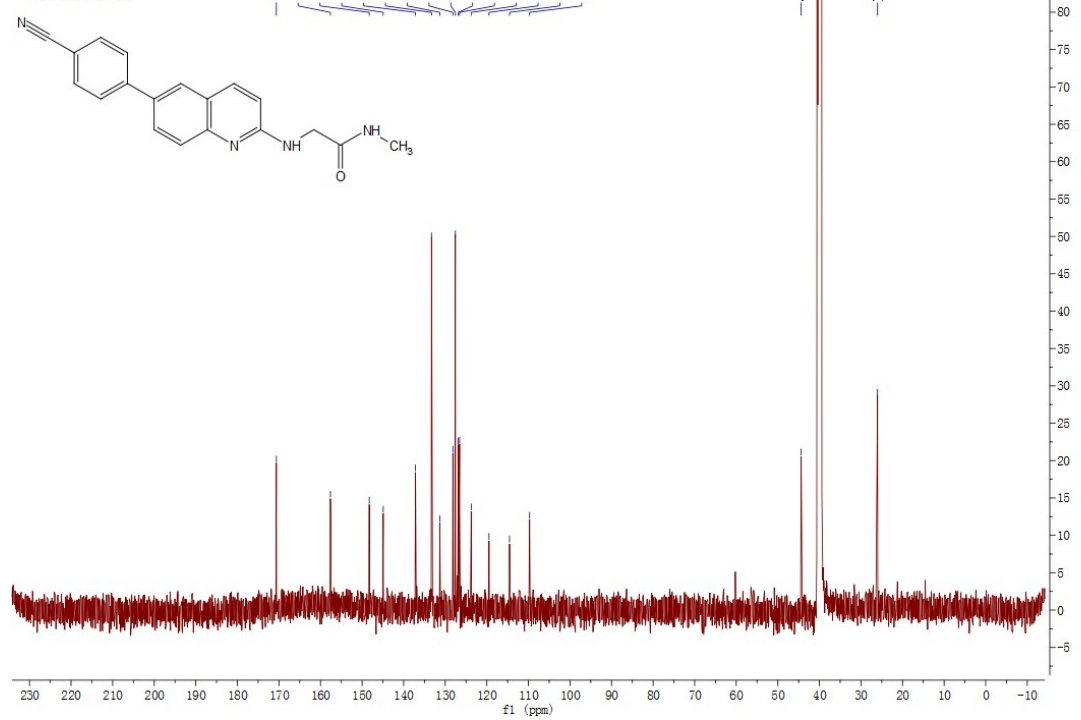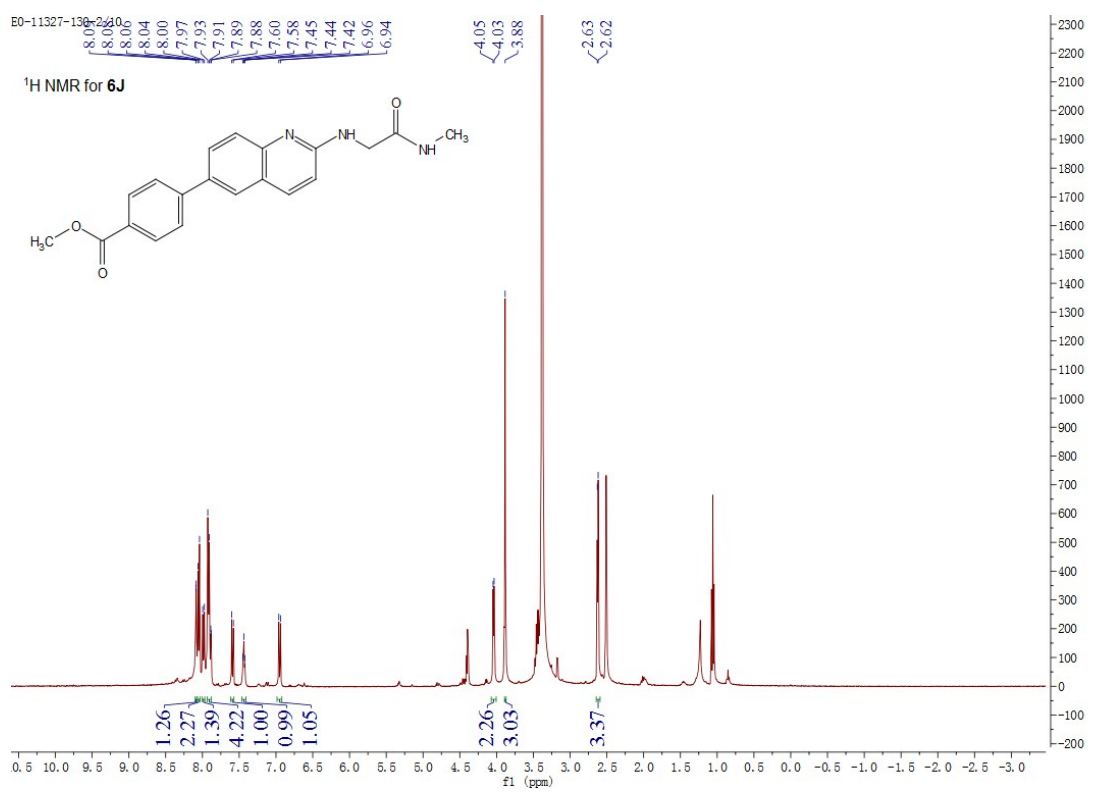

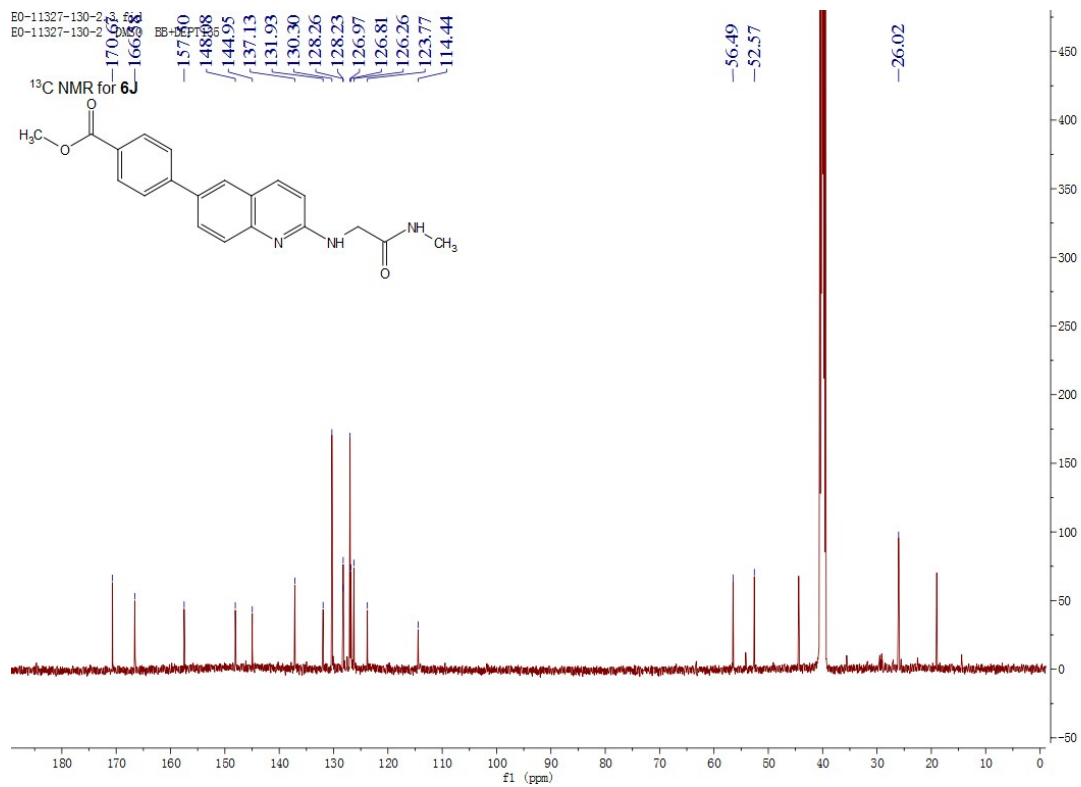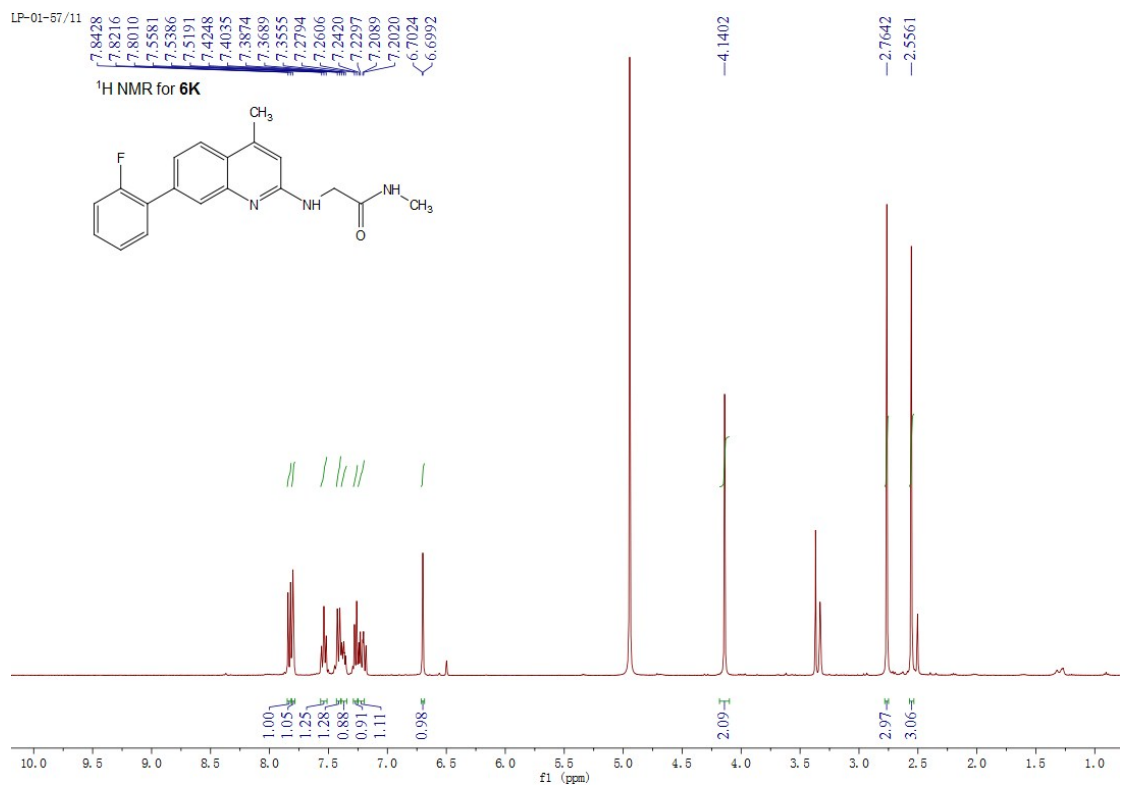

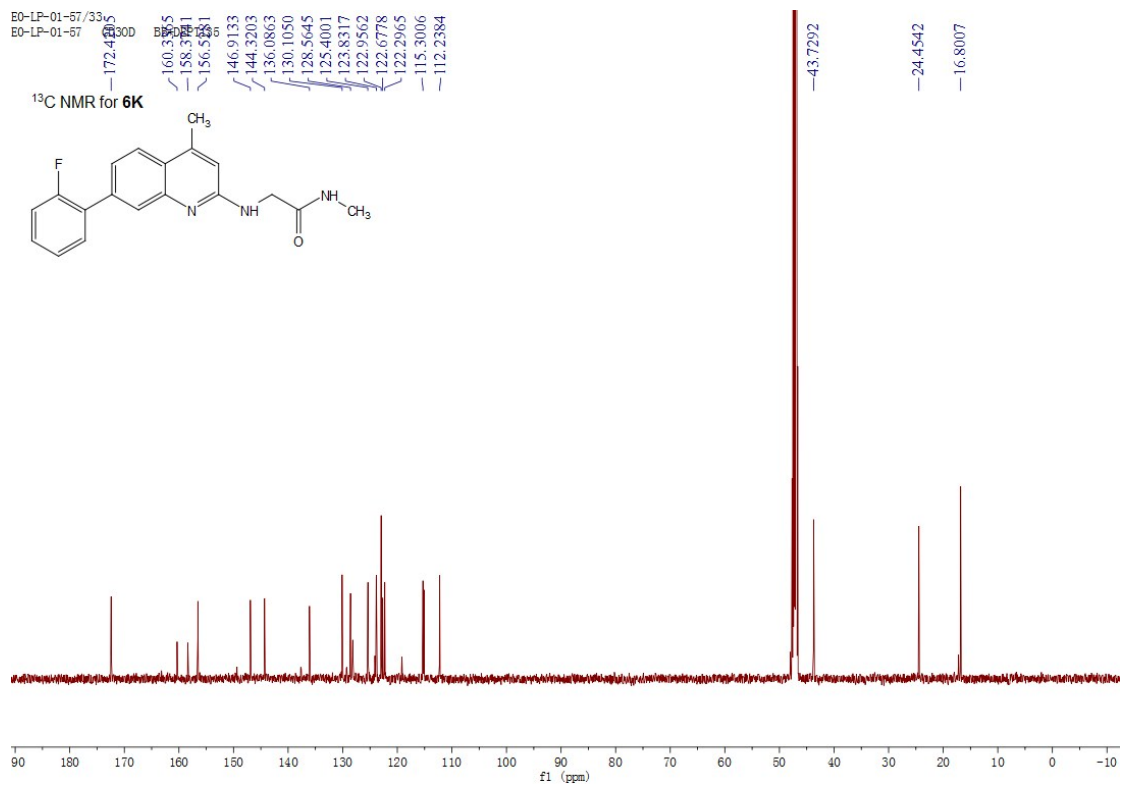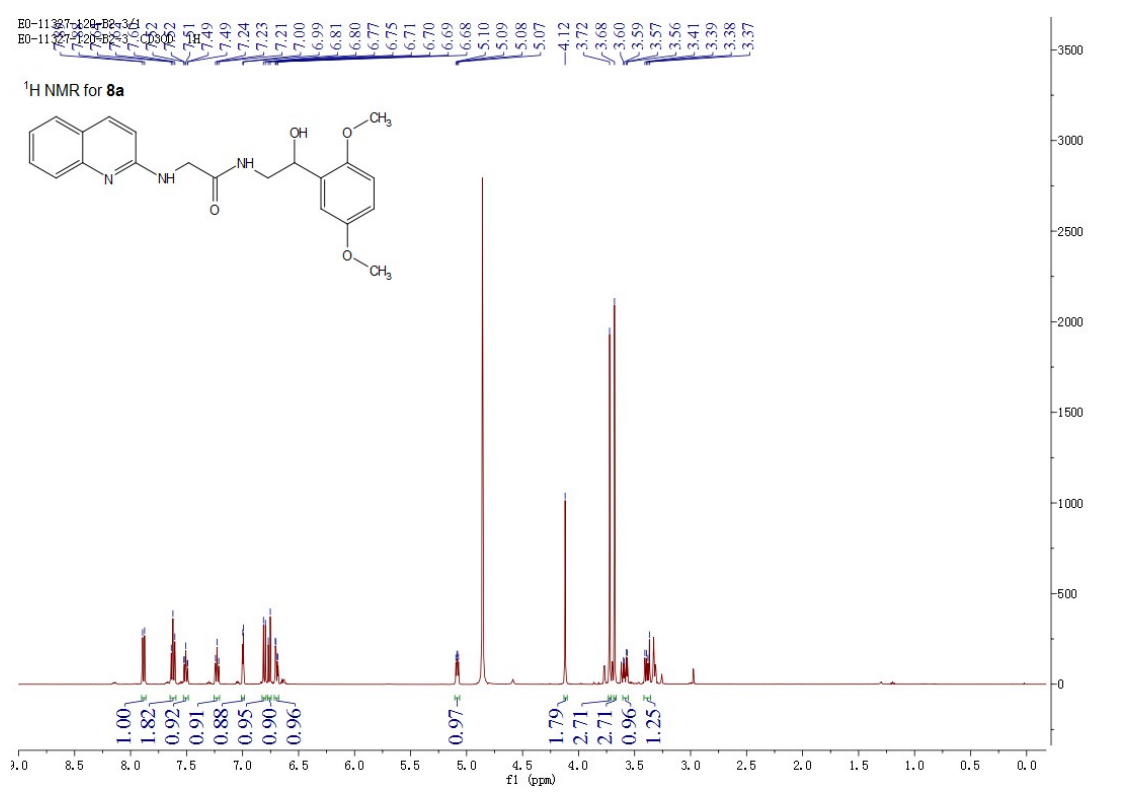

EO-11327-120-B2-3, 3.fid  
EO-11327-120-B2-3 CD30D

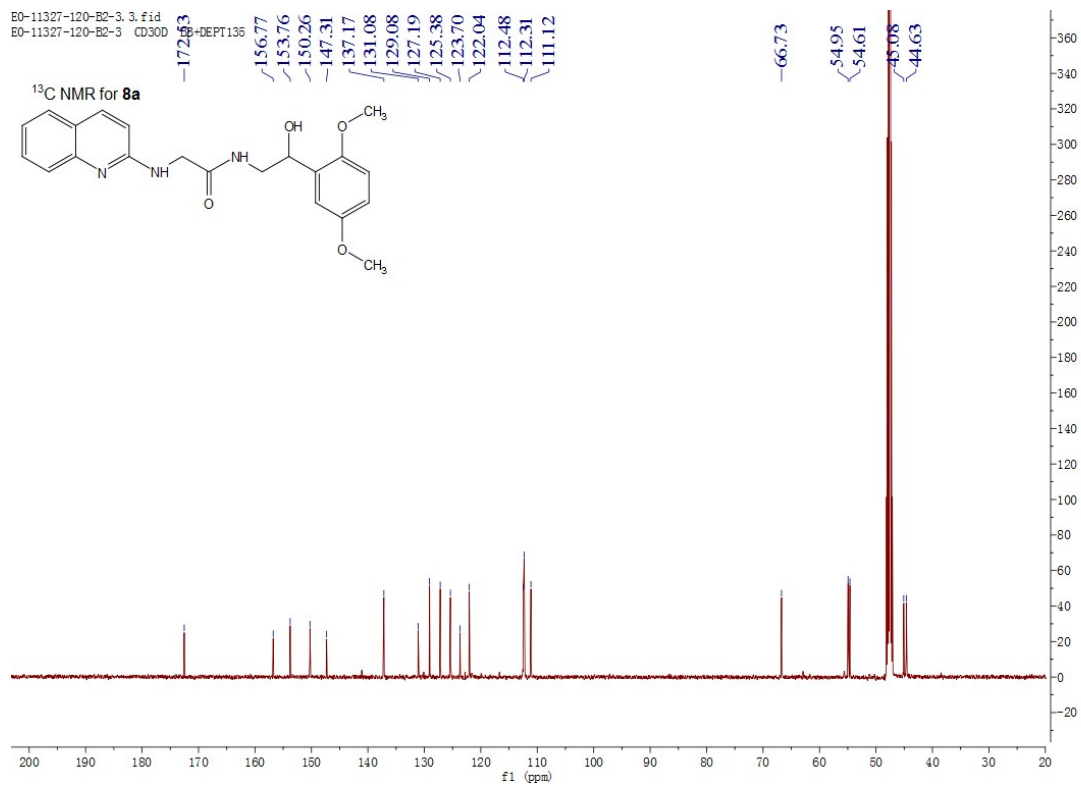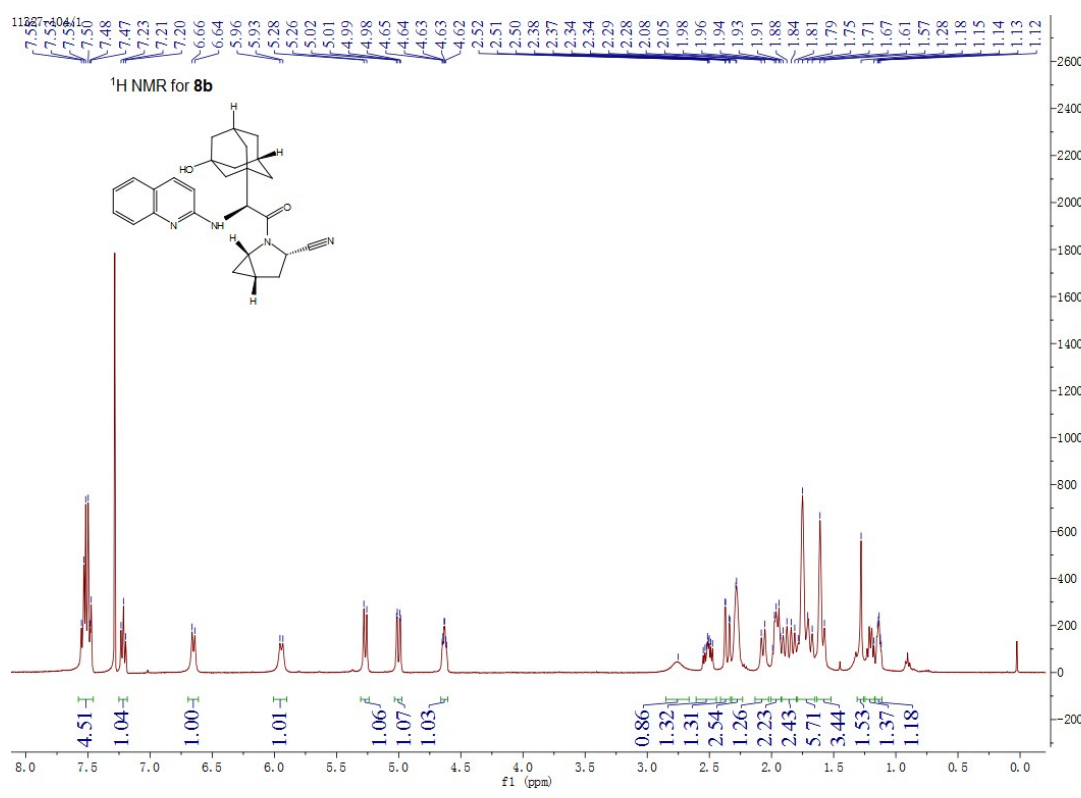

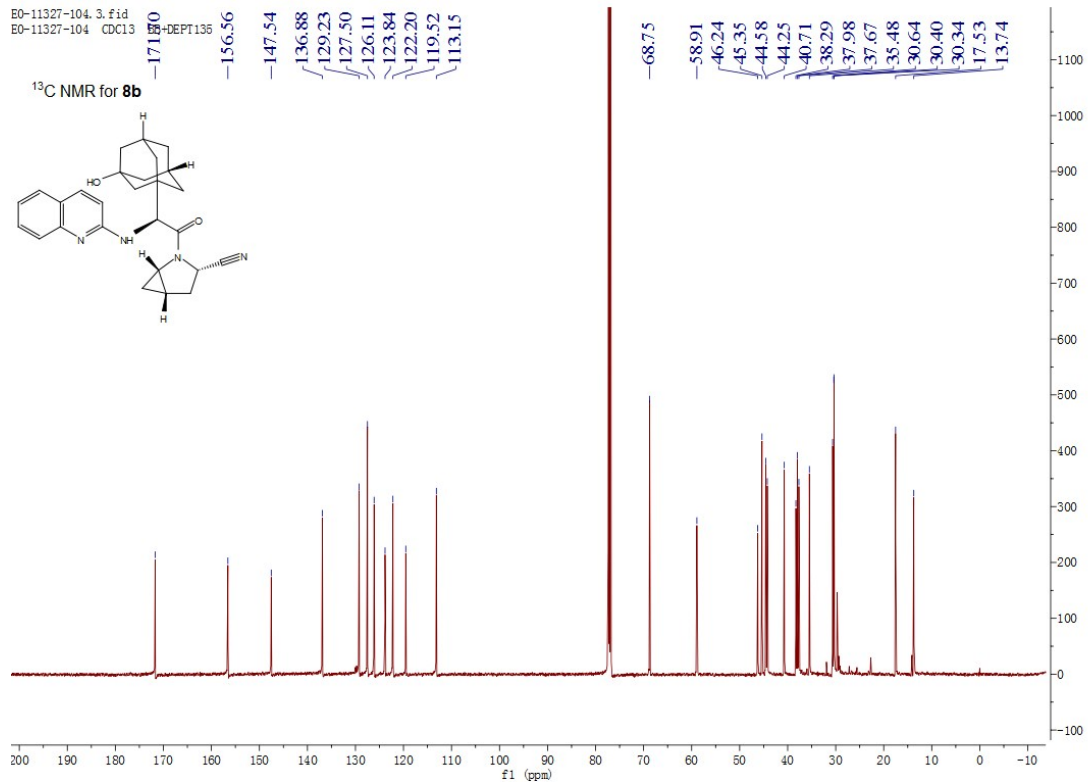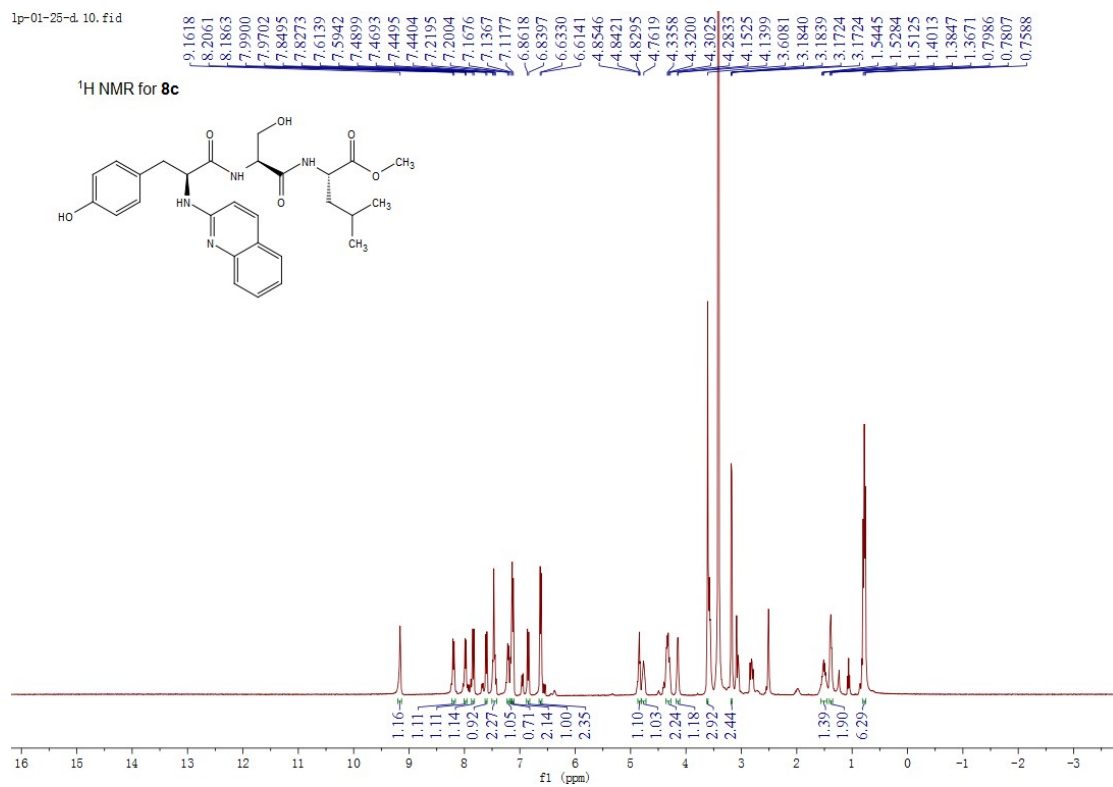



EO-IP-01-25-D.3.fid  
EO-IP-01-25-D.DMSO-d6

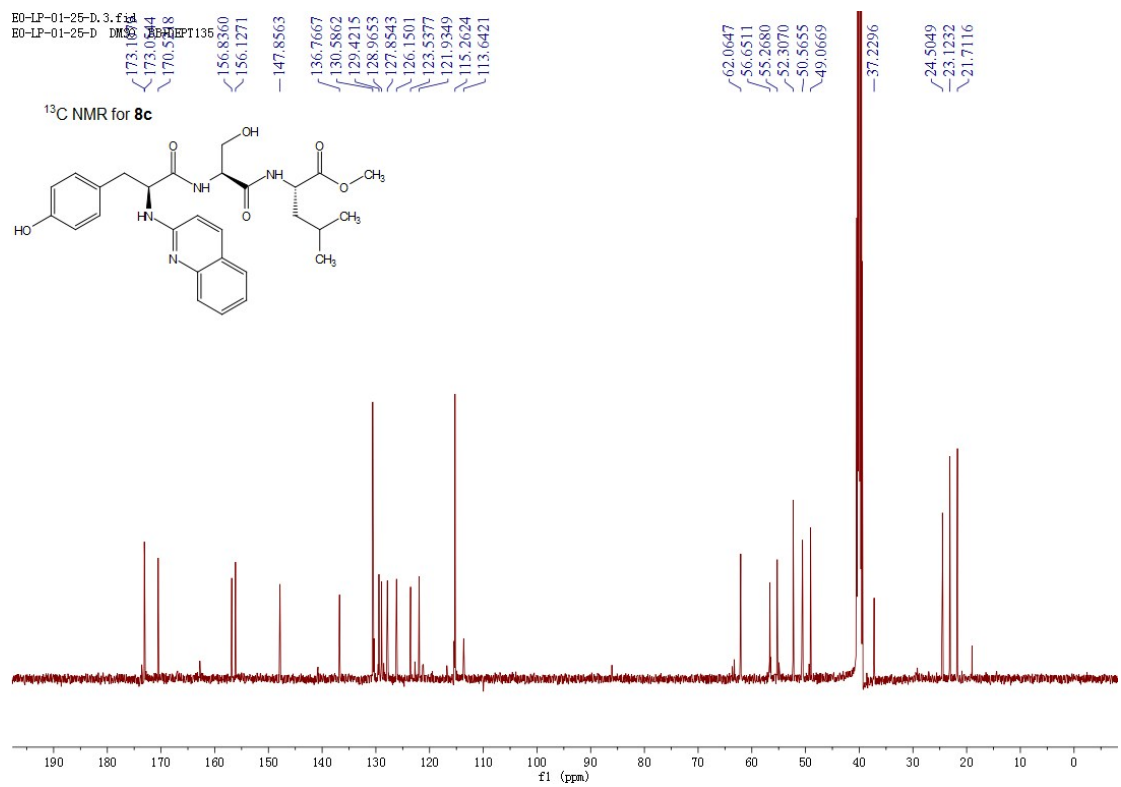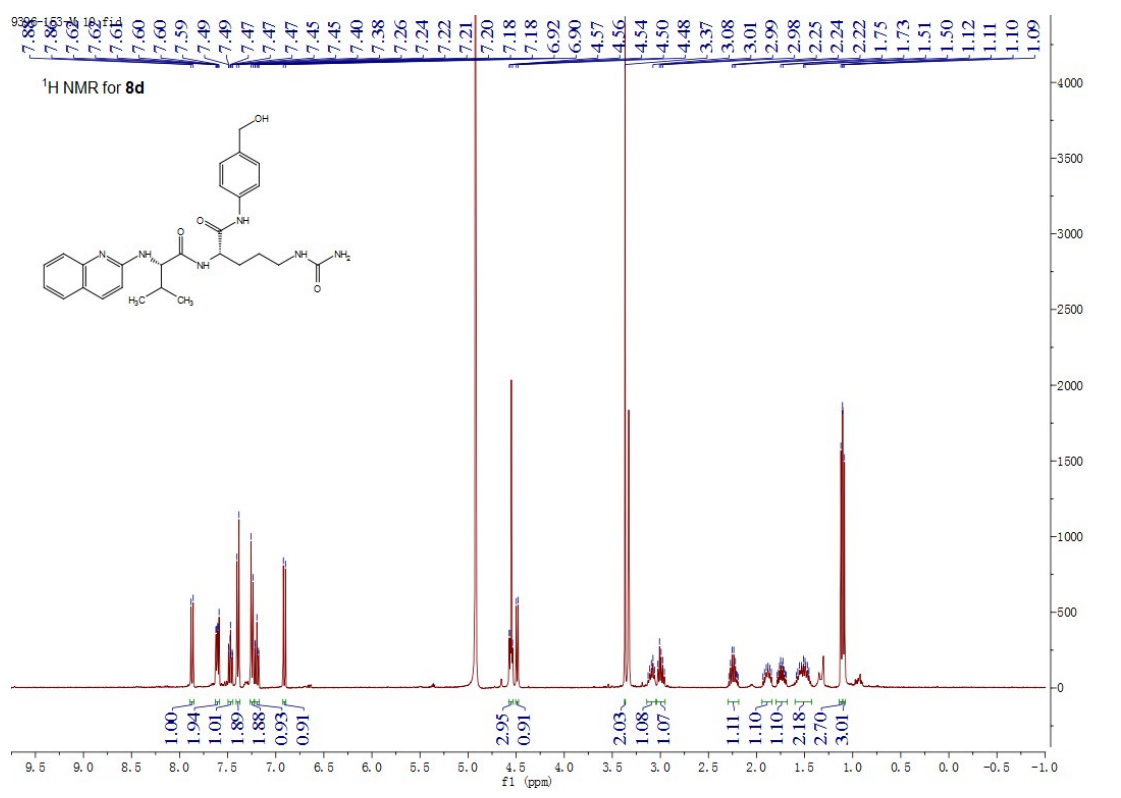

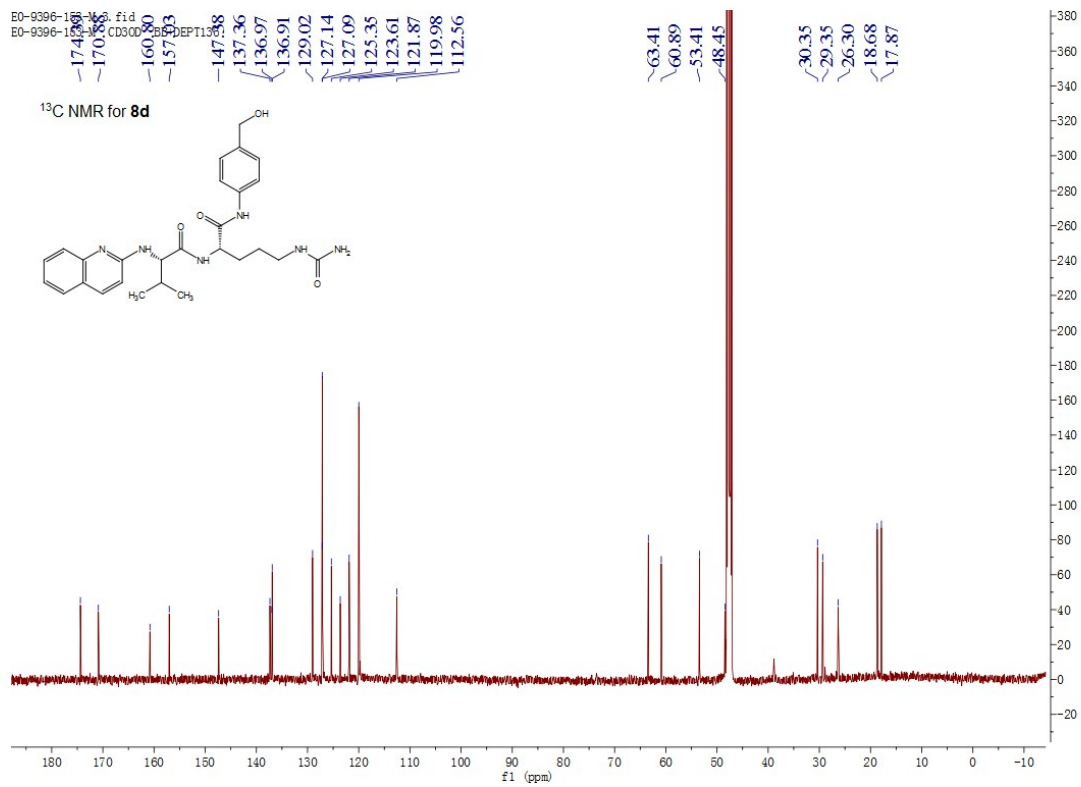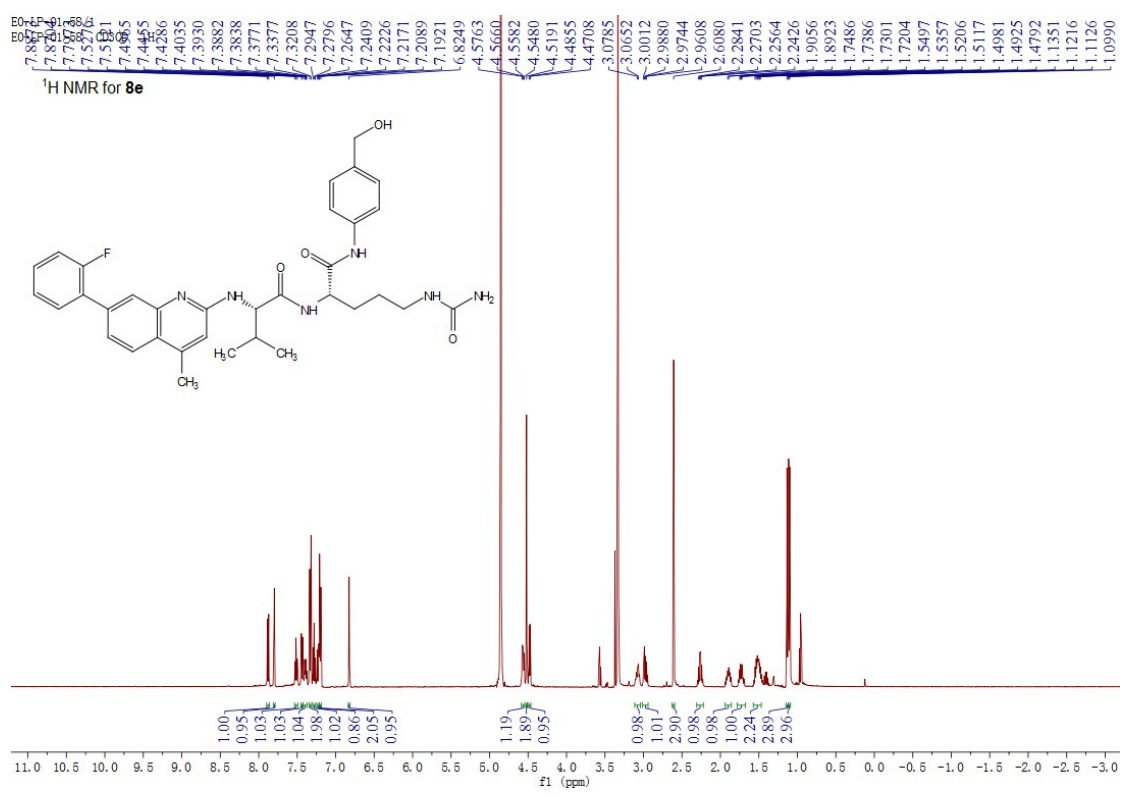

E0-LP-01-58/3  
E0-LP-01-58 CD3OD BB-DEPT135

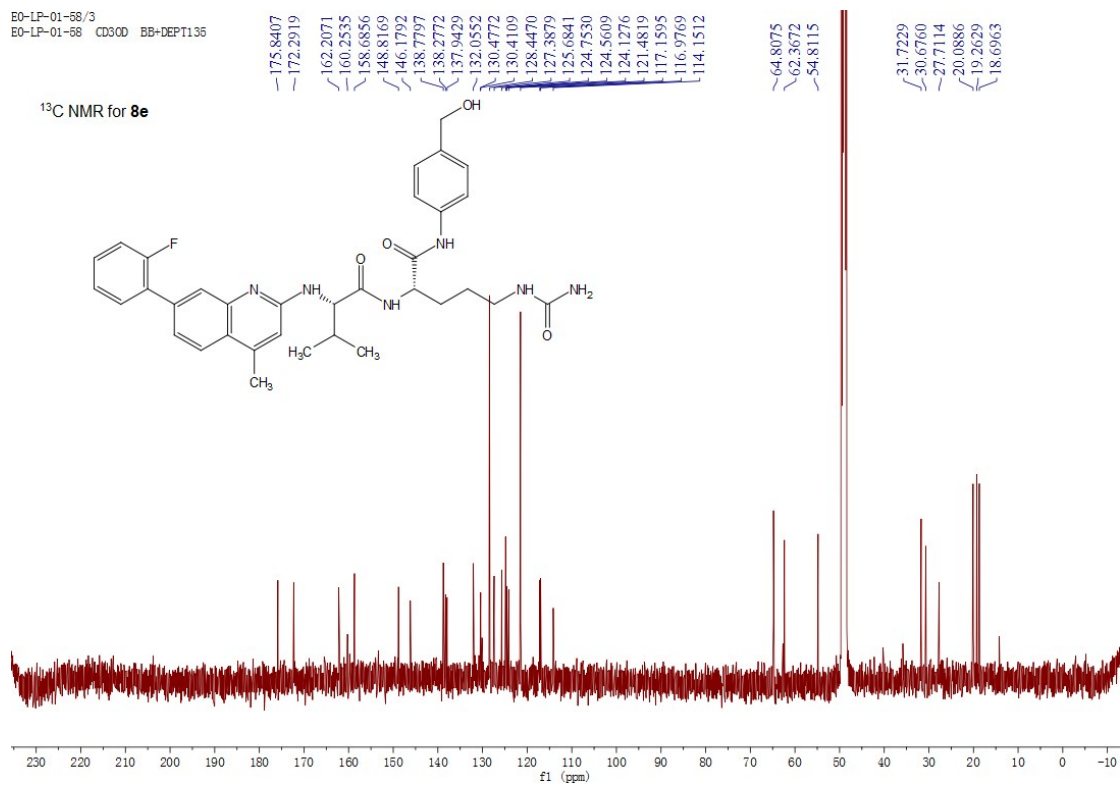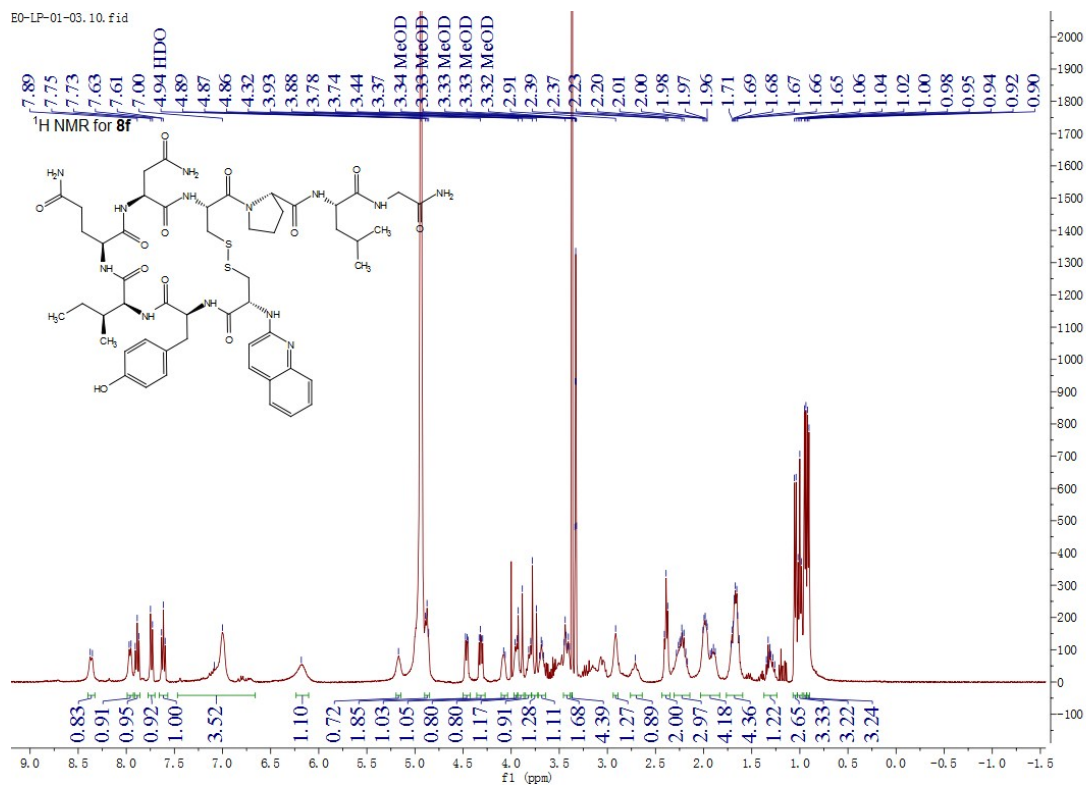

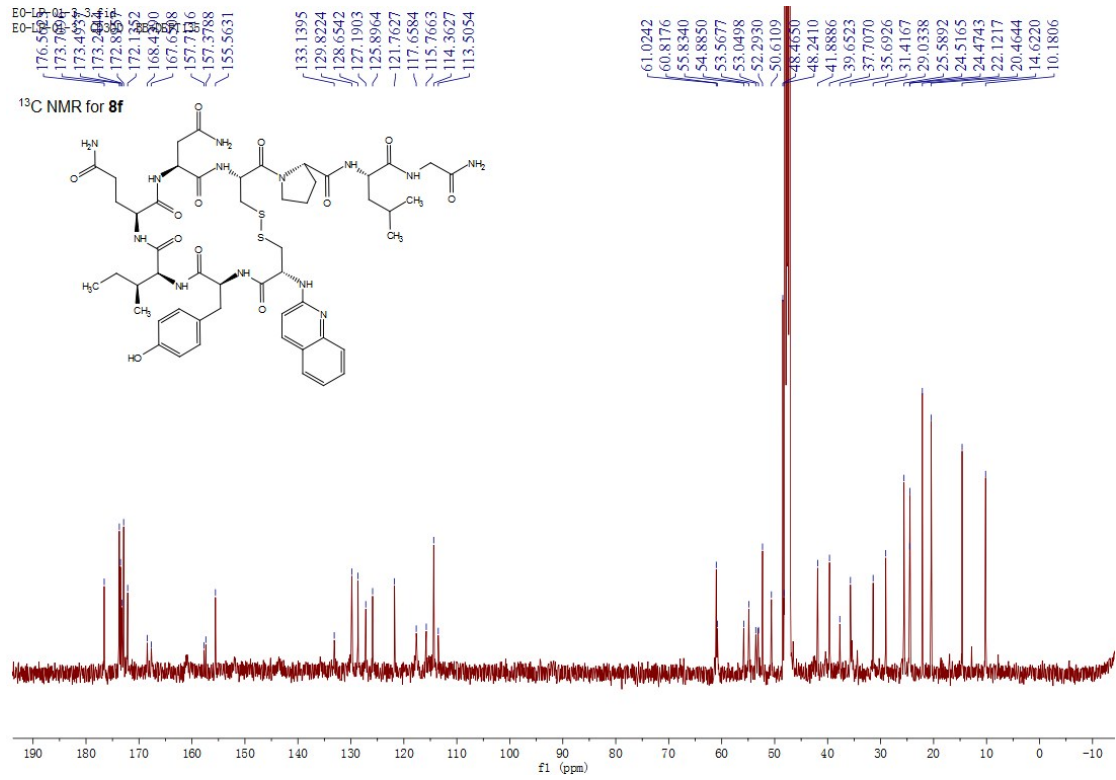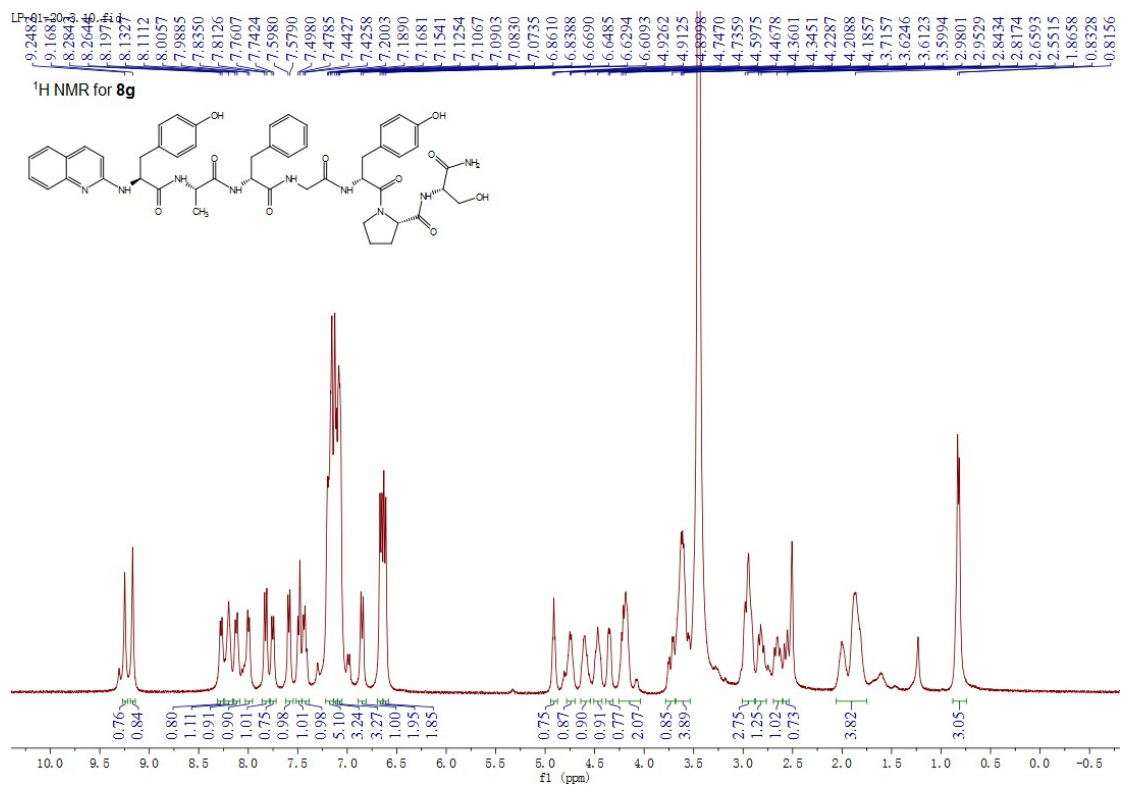

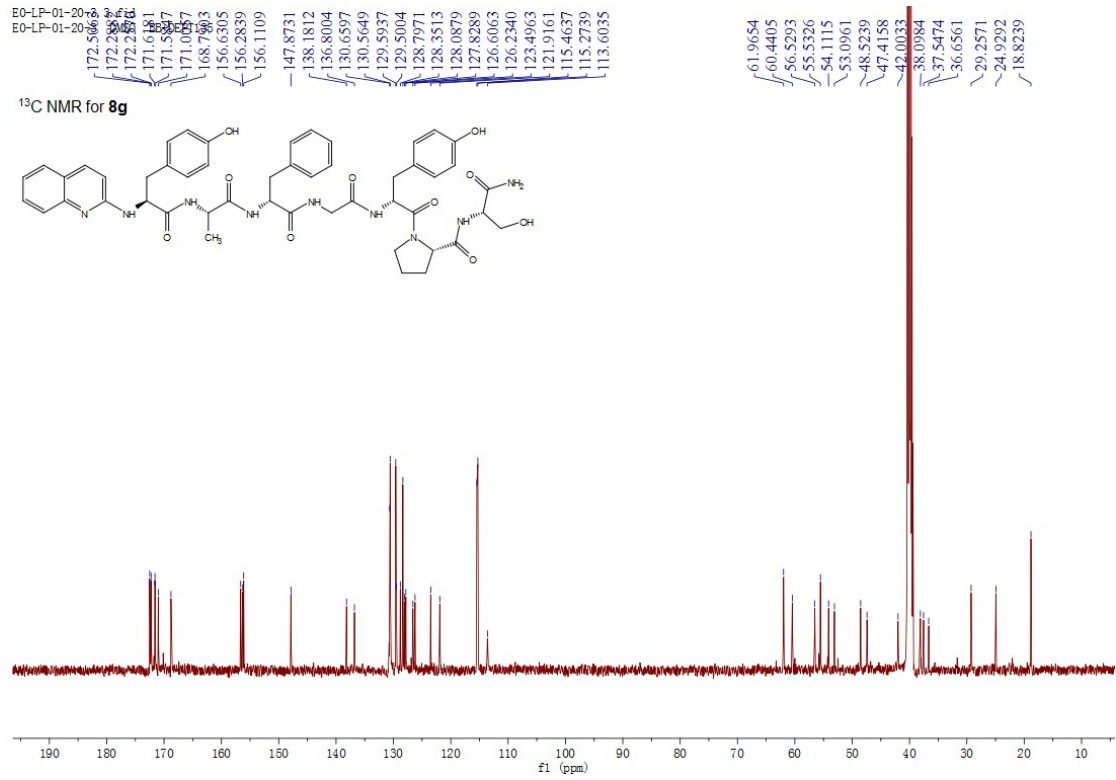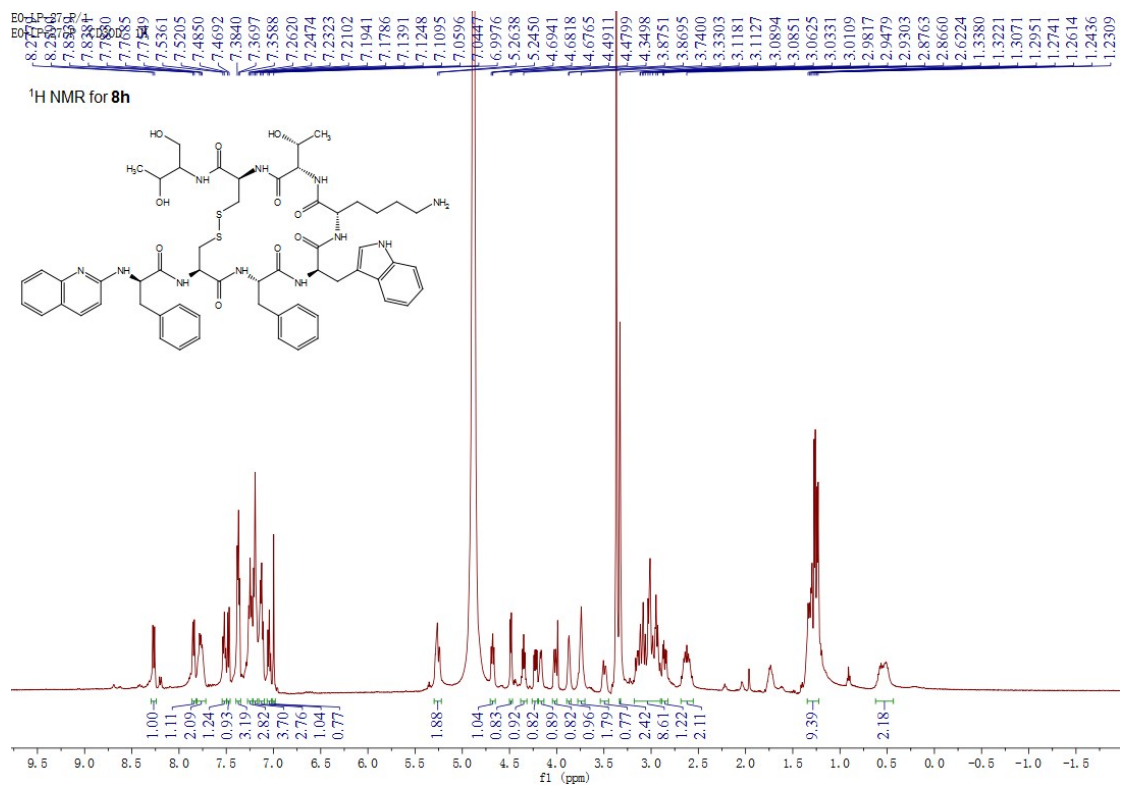

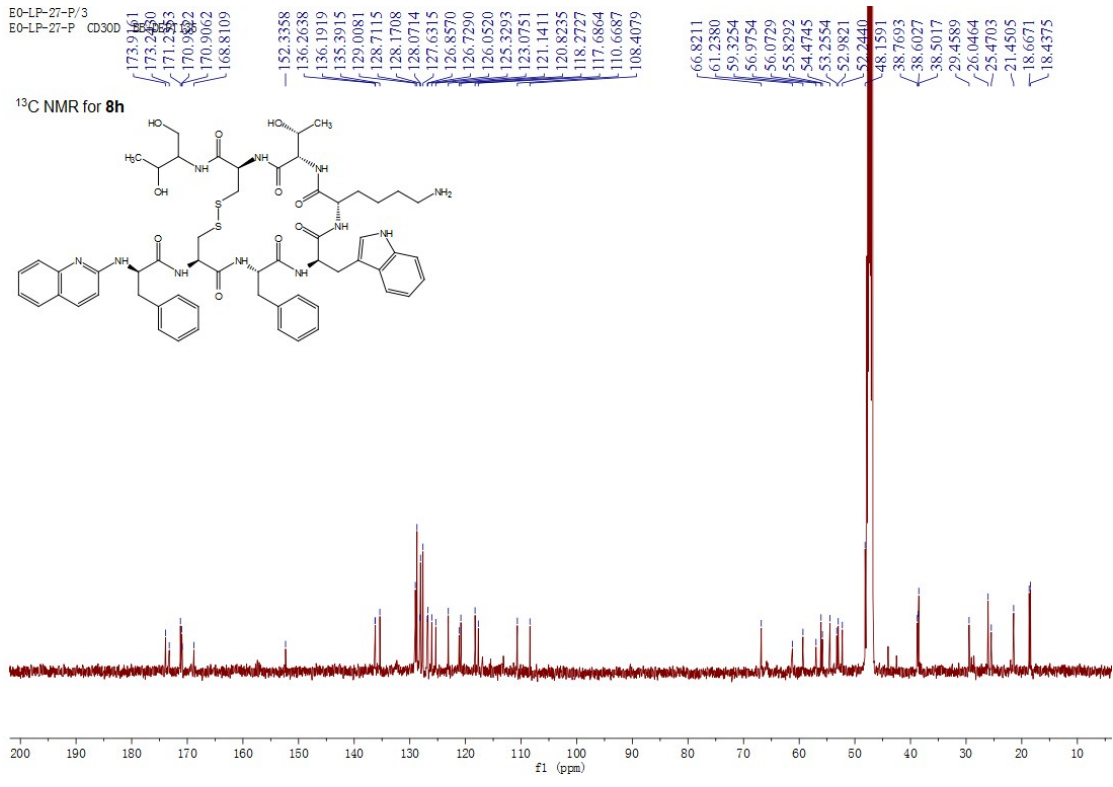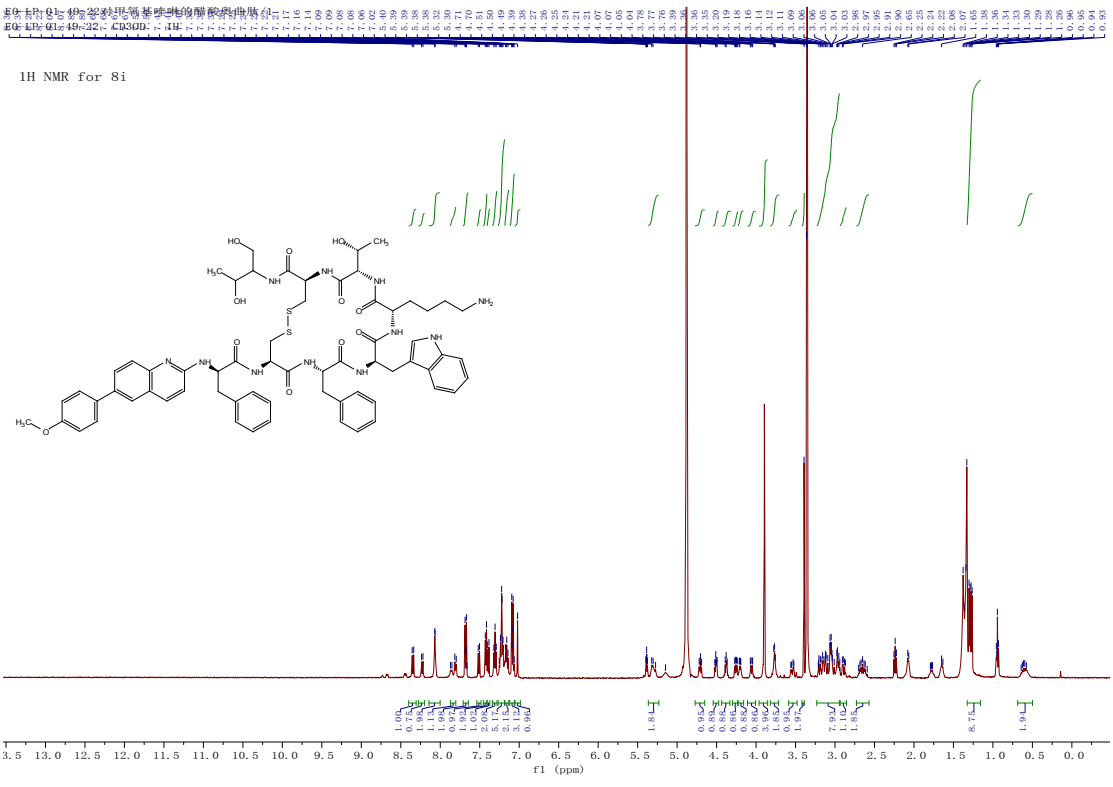



EO-LP-01-49-22/3  
EO-LP-01-49-22  
**<sup>13</sup>C NMR for 8i**

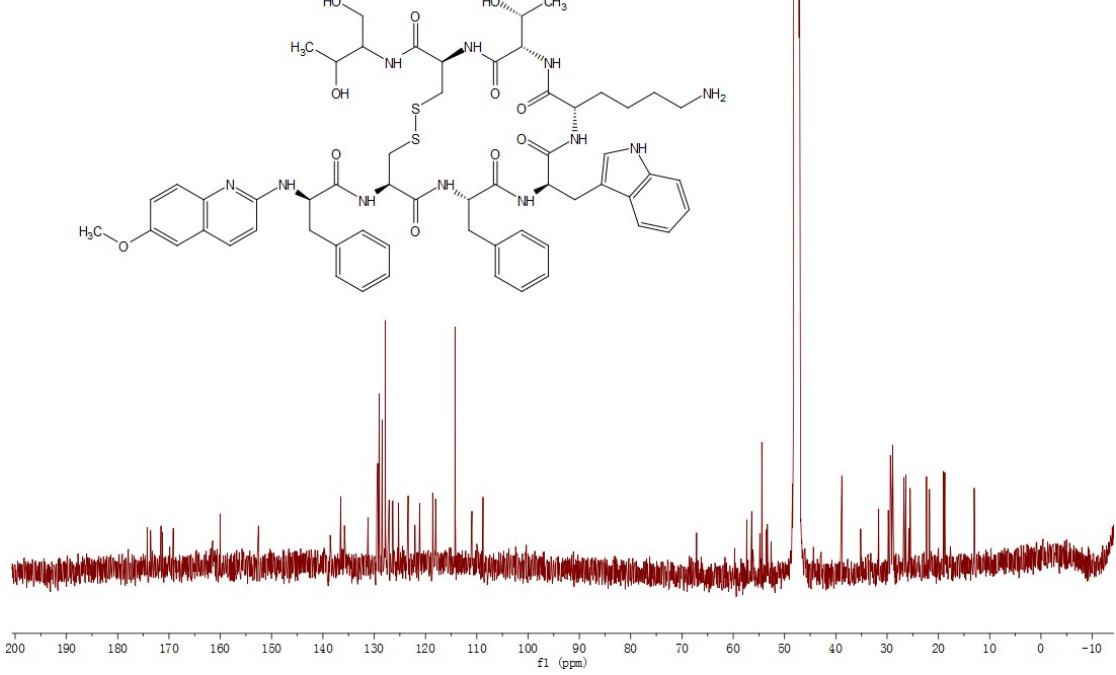

Supplement: c9gc01442j1.pdf [file c9gc01442j1.pdf]
